# Supplementary material for: Visible light mediated synthesis of 1,3-diarylated imidazo[1,5-a]pyridines via oxidative amination of C–H catalyzed by graphitic carbon nitride
Source: Royal Society of Chemistry journal article supplement (doi:10.1039/d3ob01636f), 2023-01-01
Supplement: d3ob01636f1.pdf [file d3ob01636f1.pdf]

### Supporting information

#### **Visible light mediated synthesis of 1,3-diarylated imidazo[1,5a] pyridines via oxidative amination of C-H catalyzed by graphitic carbon nitride**

*Nandishkumar Talpada<sup>a‡</sup>, Anuj S. Sharma<sup>a‡</sup>, Vinay S. Sharma<sup>\*a</sup>, Rajender S Varma<sup>b</sup>, Pranav S. Shrivastav<sup>\*a</sup>, Rahul Ahmed<sup>c</sup>, Achalkumar Ammathnadu Sudhakar<sup>\* cd</sup>*

<sup>a</sup>Department of Chemistry, School of Sciences, Gujarat University, Ahmedabad, Gujarat 380009, India.

<sup>b</sup> Centre of Excellence for Research in Sustainable Chemistry, Department of Chemistry, Federal University of São Carlos, 13565-905 São Carlos-SP, Brazil.

<sup>c</sup>Department of Chemistry, Indian Institute of Technology, Guwahati, 781039, Assam, India.

<sup>d</sup>Centre for Sustainable Polymers, Indian Institute of Technology, Guwahati, 781039, Assam, India.

*‡ Both are equally contributed*

#### **\*Corresponding Author**

Vinay S Sharma-Email: vinaysharma3836@gmail.com

Pranav S Shrivastav-Email: pranavs@gujaratuniversity.ac.in

Achalkumar Ammathnadu Sudhakar-Email: achalkumar@iitg.ac.in

| <b>Entry</b>   | <b>Table of Contents</b>                                                                                                    | <b>Page No.</b> |
|----------------|-----------------------------------------------------------------------------------------------------------------------------|-----------------|
|                | Chemicals, reagents and instrumentation                                                                                     | S3              |
|                | Preparation of g-C <sub>3</sub> N <sub>4</sub>                                                                              | S3              |
| Figure S1-S8   | SEM-EDX images of g-C <sub>3</sub> N <sub>4</sub>                                                                           | S4-S11          |
| Figure S9      | TGA of g-C <sub>3</sub> N <sub>4</sub>                                                                                      | S12             |
| Table S1       | Comparison table for the GCM (green chemistry metrics) for the synthesis of Compound 3a.                                    | S13             |
|                | Calculation of Green chemistry metrics (GCM) for compound 3a                                                                | S13             |
|                | Calculation of Green chemistry metrics (GCM) for compound 3a by reported ones                                               | S15             |
| Table S2       | Comparison table for the synthesis of 1,3-diarylated Imidazo[1,5a] pyridines compound (3a) by deploying reported catalysts. | S19             |
| Figure S10-S13 | SEM-EDX images of reused g-C <sub>3</sub> N <sub>4</sub>                                                                    | S20-23          |
|                | Synthesis and structural characterization of compounds (3a to 3v)                                                           | S24             |
|                | <i>Copies of LC-MS, <sup>1</sup>H NMR and <sup>13</sup>C NMR</i>                                                            | S35             |
|                | References                                                                                                                  | S102            |

## Chemicals, reagents and instrumentation

All reagents and the chemicals used for the preparation of catalyst were purchased from commercial sources (Merck and Spectrochem). The crystalline or amorphous nature of graphitic carbon nitride (g-C<sub>3</sub>N<sub>4</sub>) was analysed by using powder X-ray diffractometer (PXRD) (Shimadzu, Maxima 7000 S) using CuK $\alpha$  ( $\lambda=1.5418$  Å at 40 kV and 40 mA.  $2\theta$  range was from 5 to 80 °C (scanning speed= 5° min<sup>-1</sup>). Fourier-transform infrared spectroscopy (FTIR) studies were done for functional group analysis using Perkin Elmer, Frontier equipment. Morphology studies were analyzed using FESEM with OXFORD EDS, Zeiss, Sigma.. Thermogravimetric analysis was conducted from 25 °C to 700 °C (heating rate, 10°C/min) under nitrogen atmosphere using STAR system. <sup>1</sup>H NMR (600 MHz) and <sup>13</sup>C NMR (151MHz) were recorded on Bruker NMR spectrometer using TMS as internal standard in CDCl<sub>3</sub>.

## Preparation of g-C<sub>3</sub>N<sub>4</sub>

Synthesis of g-C<sub>3</sub>N<sub>4</sub> was accomplished according to the method reported in our earlier report <sup>1</sup>. The graphitic carbon nitride support (g-C<sub>3</sub>N<sub>4</sub>) was synthesized by calcinations of urea at 550 °C for 3h in Muffle furnace in an inert atmosphere.

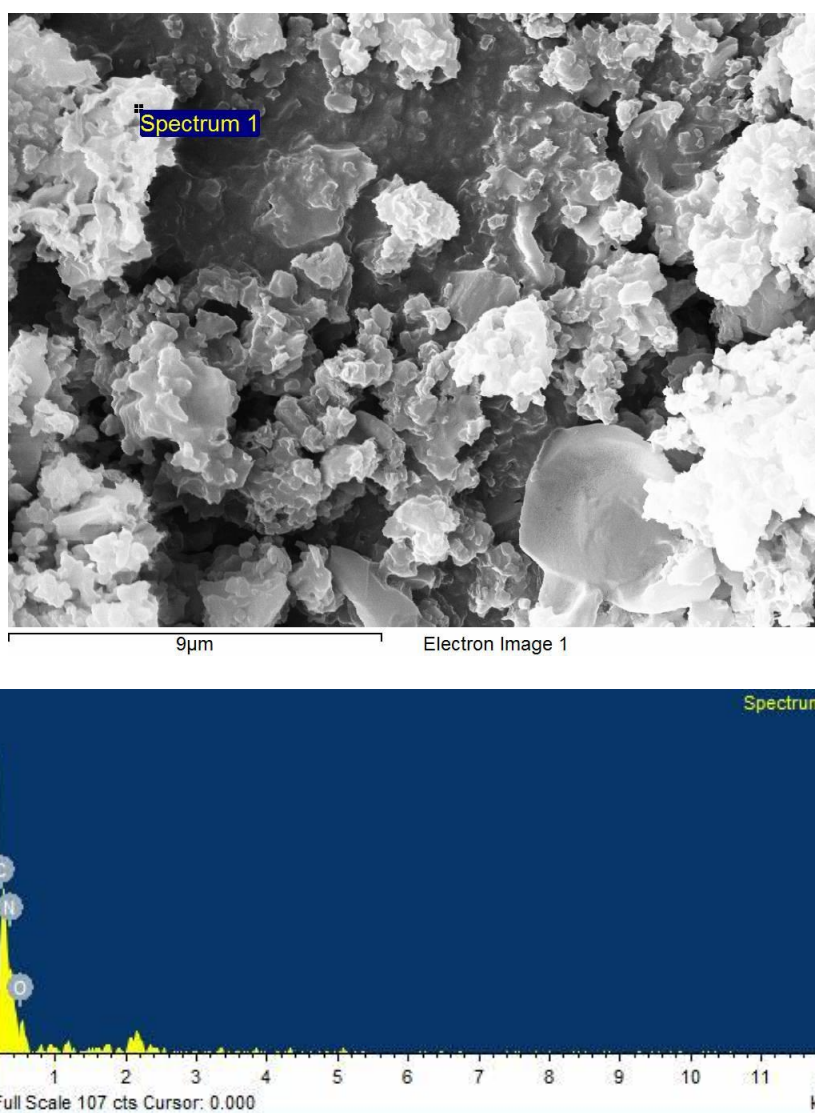

Figure S1. SEM-EDX images of g-C<sub>3</sub>N<sub>4</sub>(C = 28.24%, N = 53.14% and O = 18.62%).

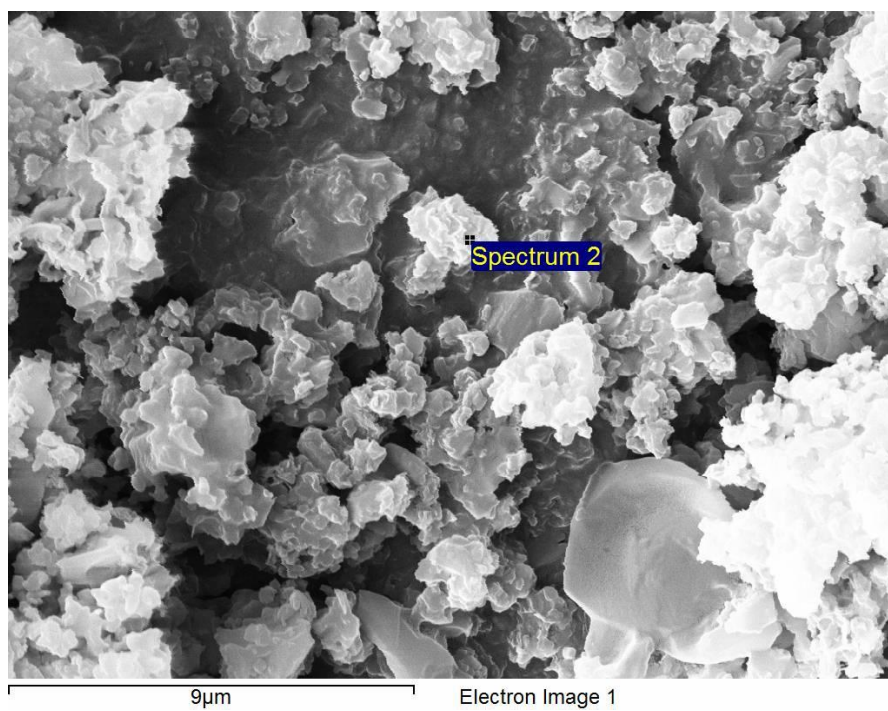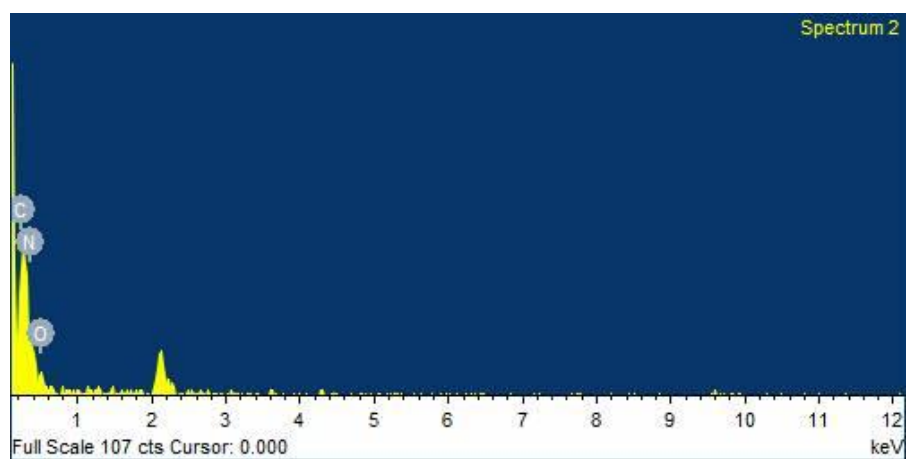

Figure S2. SEM-EDX images of g-C<sub>3</sub>N<sub>4</sub>(C = 31.97%, N = 53.44% and O = 14.59%).

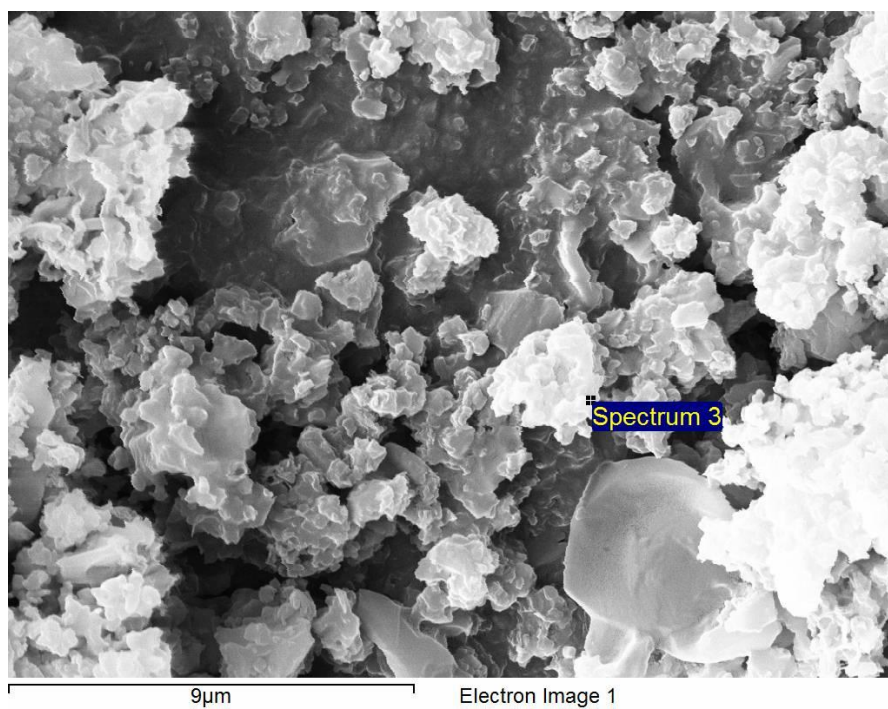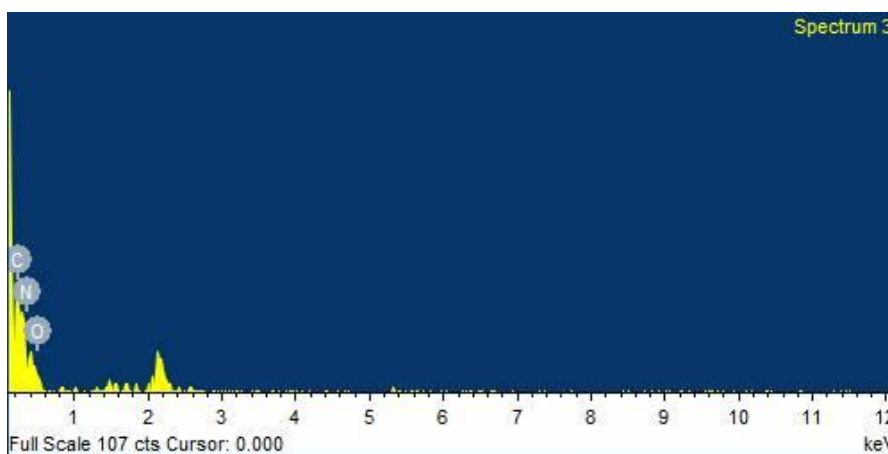

Figure S3. SEM-EDX images of g-C<sub>3</sub>N<sub>4</sub> (C = 34.57%, N = 47.17% and O = 18.26%).

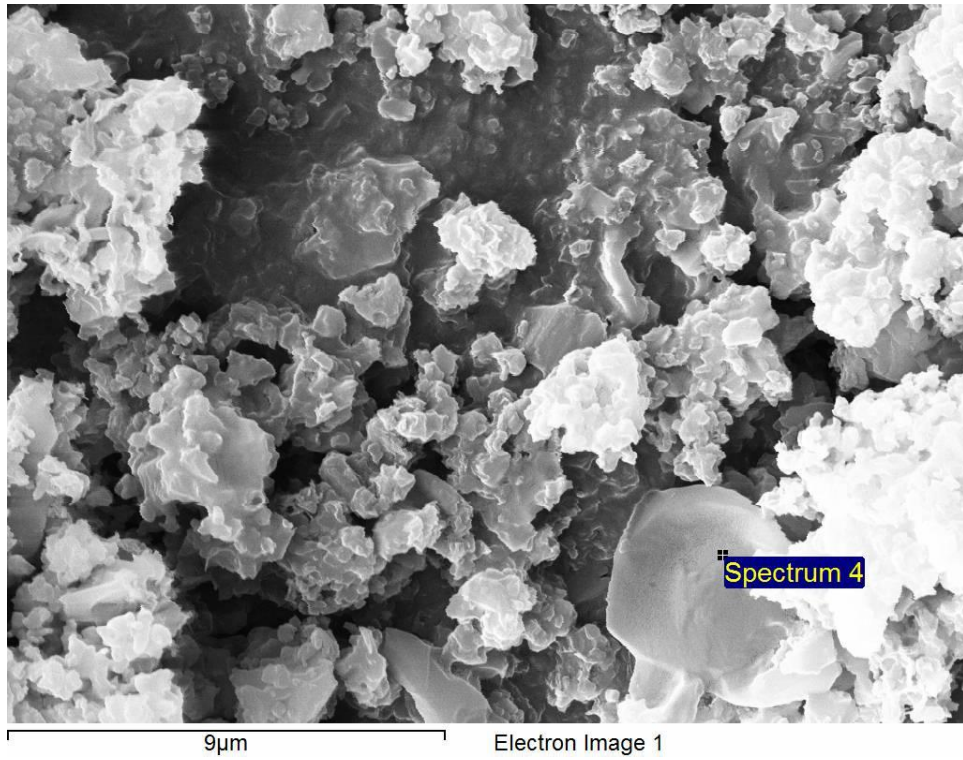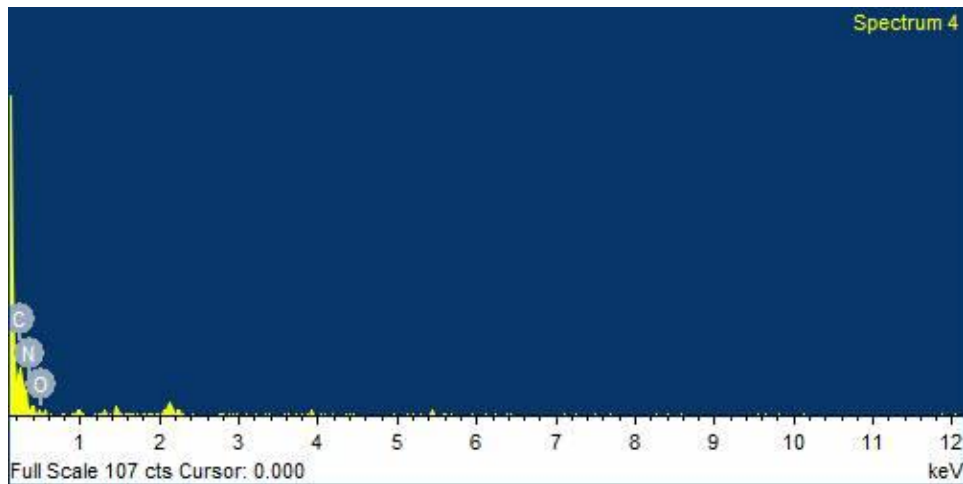

Figure S4. SEM-EDX images of g-C<sub>3</sub>N<sub>4</sub> (C = 34.27%, N = 47.43% and O = 18.30%).

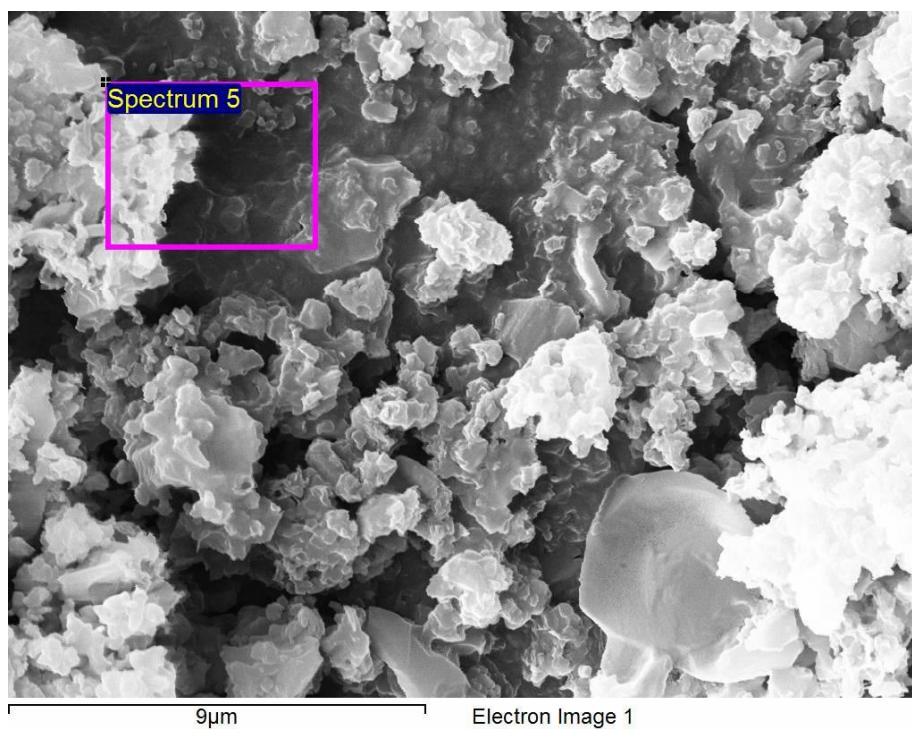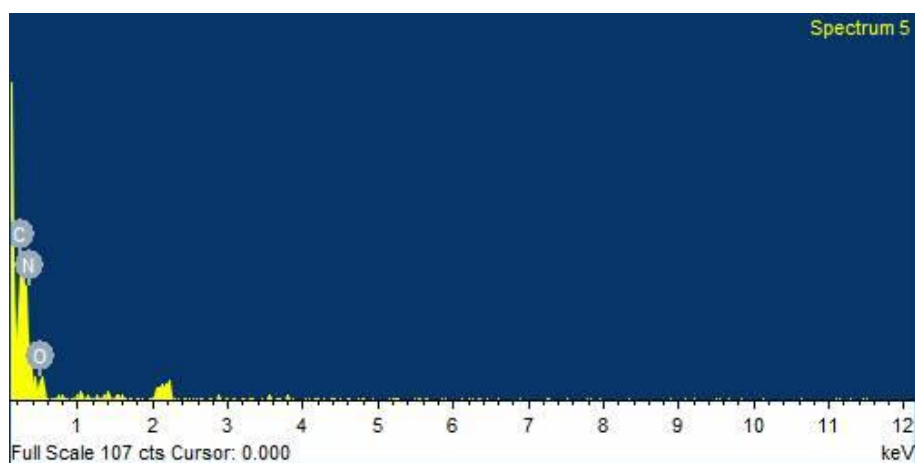

Figure S5. SEM-EDX images of g-C<sub>3</sub>N<sub>4</sub> (C = 30.27%, N = 48.43% and O = 21.30%).



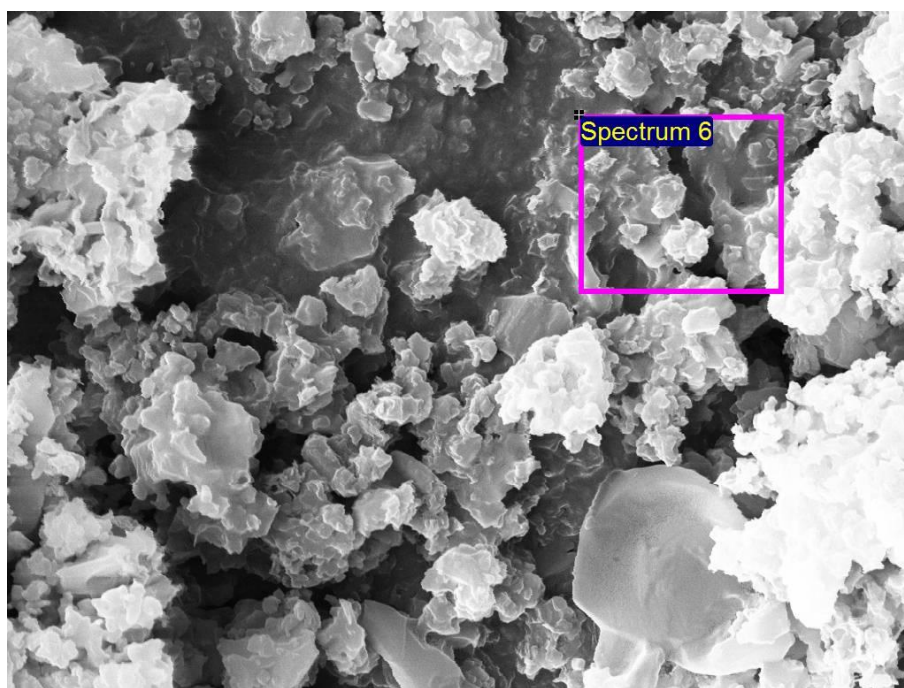

9µm

Electron Image 1

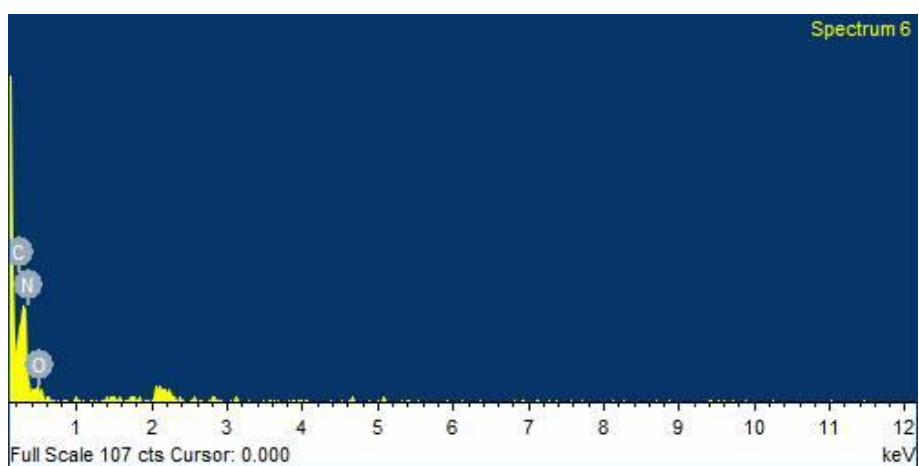

Figure S6. SEM-EDX images of g-C<sub>3</sub>N<sub>4</sub> (C = 32.44%, N = 47.16% and O = 20.41%).

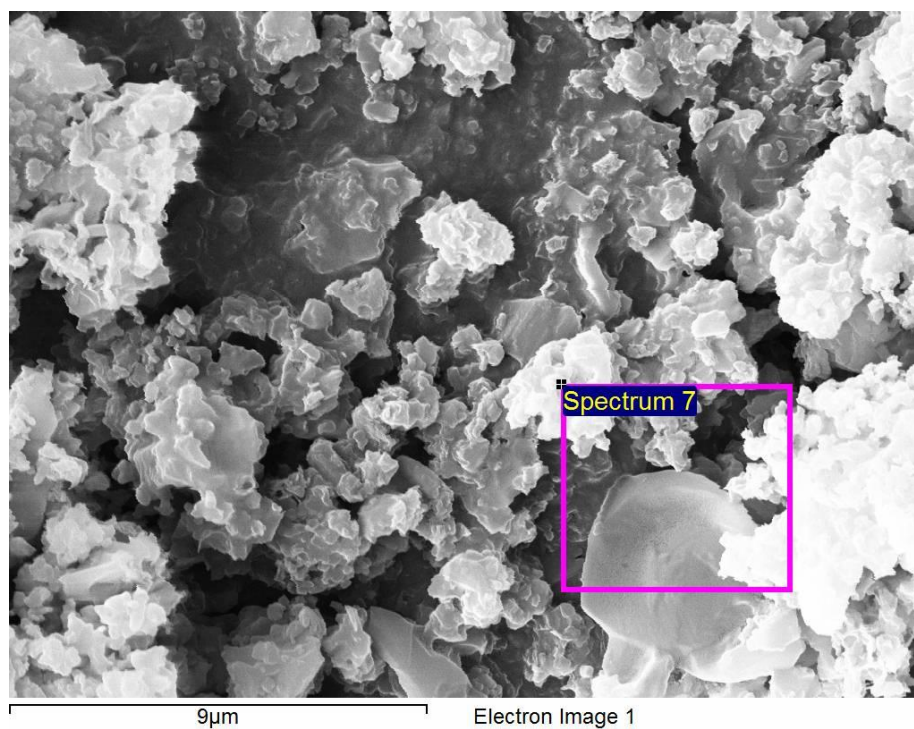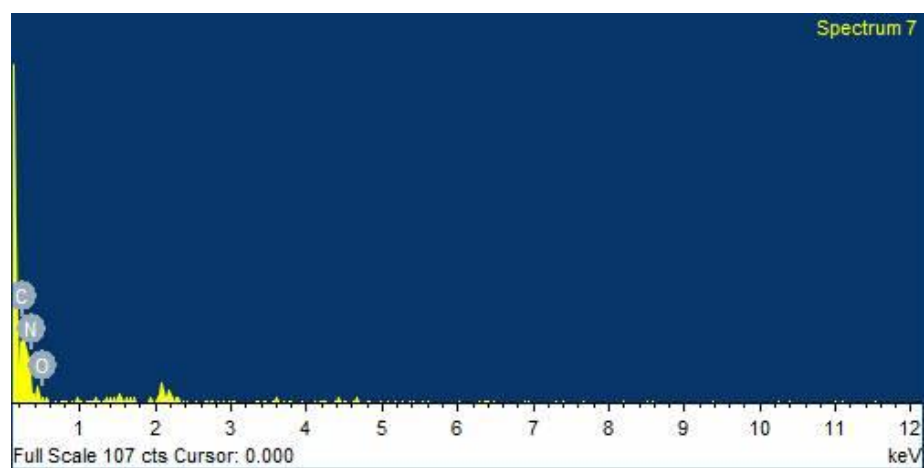

Figure S7. SEM-EDX images of g-C<sub>3</sub>N<sub>4</sub> (C = 68.45%, N = 15.74% and O = 15.82%).

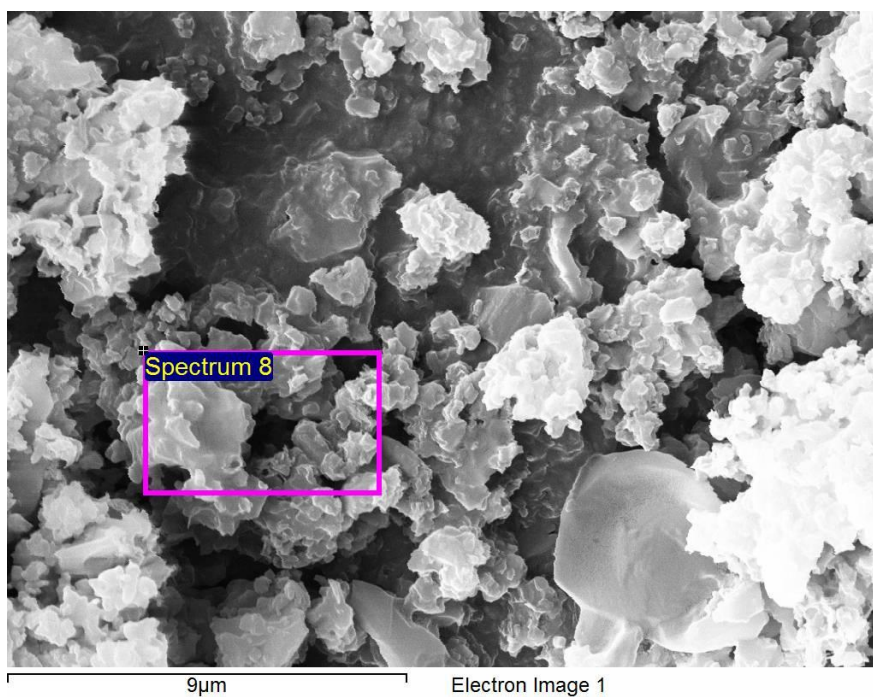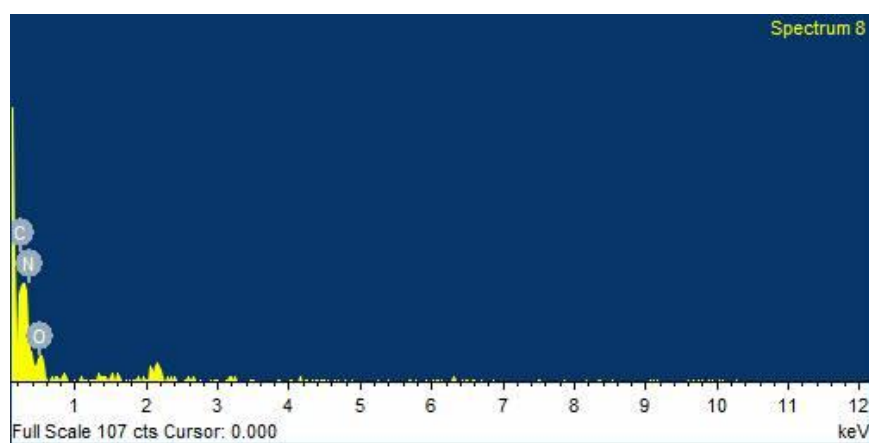

Figure S8. SEM-EDX images of g-C<sub>3</sub>N<sub>4</sub> (C = 29.62%, N = 44.81% and O = 25.57%).

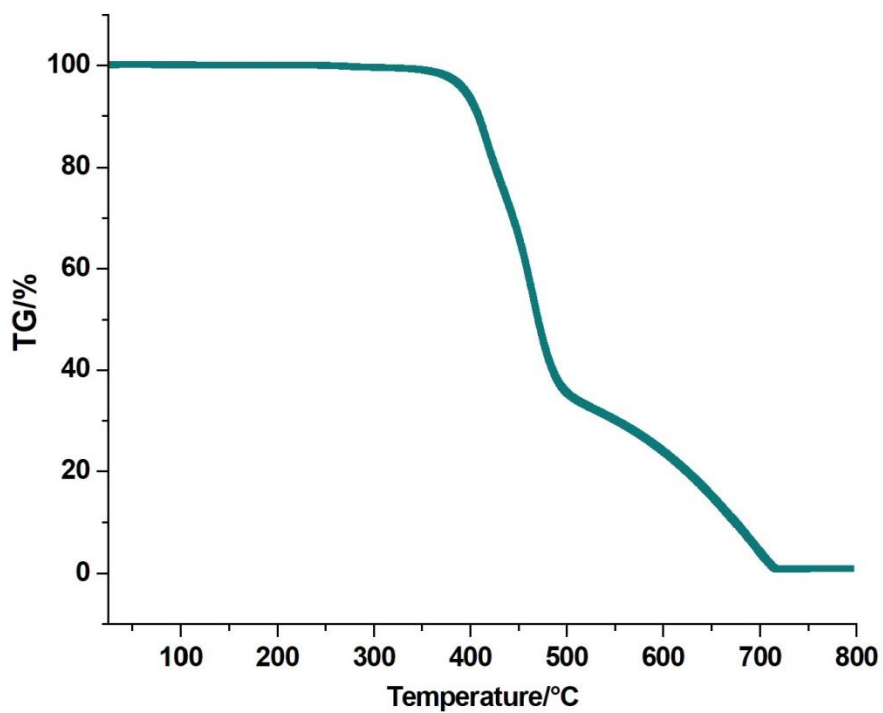

Figure S9. TGA of g-C<sub>3</sub>N<sub>4</sub>.

Table S1. Comparison table for the GCM (*green chemistry metrics*) for the synthesis of Compound 3a.

| Green Metrics                             | Catalyst                               |                |       |                                 |
|-------------------------------------------|----------------------------------------|----------------|-------|---------------------------------|
|                                           | Cu(OAc) <sub>2</sub> .H <sub>2</sub> O | I <sub>2</sub> | CuBr  | g-C <sub>3</sub> N <sub>4</sub> |
| Environmental impact factor ( <i>Ef</i> ) | 38.73                                  | 47.33          | 135   | 0.97                            |
| Process mass intensity ( <i>PMI</i> )     | 39.73                                  | 48.33          | 136   | 1.96                            |
| Reaction mass efficiency ( <i>RME</i> )   | 49.53                                  | 89.03          | 40.68 | 51.0                            |
| Atom economy ( <i>AE</i> )                | 48                                     | 52.36          | 59    | 93.10                           |
| Carbon efficiency ( <i>CE</i> )           | 53.23                                  | 95.48          | 43.6  | 54.46                           |
| Chemical yield ( <i>CY</i> )              | 92.48                                  | 99.15          | 43.72 | 95.0                            |
| Mass intensity ( <i>MI</i> )              | 2.13                                   | 1.69           | 2.67  | 1.96                            |
| Mass productivity ( <i>MP</i> )           | 45.0                                   | 59.17          | 37.45 | 51.02                           |
| Optimum efficiency ( <i>OE</i> )          | 103.18                                 | 170.03         | 69    | 55.0                            |
| References                                | 2                                      | 3              | 4     | This Work                       |

Calculation of Green chemistry metrics (GCM) for compound (3a)<sup>5-6</sup>.

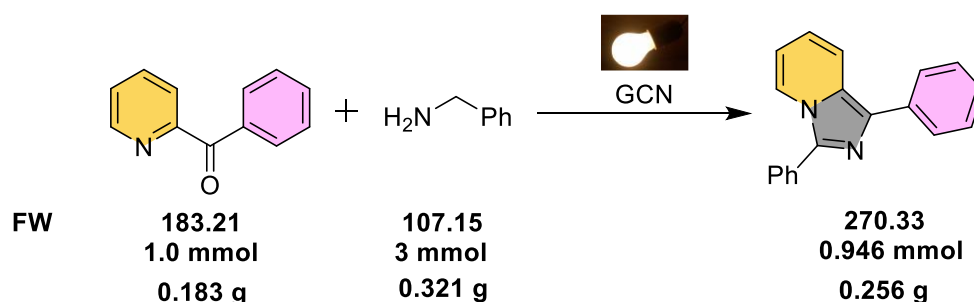

**Environmental impact factor (*Ef*):**

*E-factor* = [Total mass of raw materials minus the total mass of product] / Mass of product

$$E\text{-factor} = [0.183 \text{ g} + 0.321 \text{ g} - 0.256 \text{ g}] / [0.256 \text{ g}]$$

$$E\text{-Factor} = 0.97$$

**Process mass intensity (*PMI*):**

$$PMI = \sum(\text{Mass of stoichiometric reactants}) / [\text{Mass of product}]$$

$$PMI = \sum[(0.183 \text{ g} + 0.321 \text{ g}) / [0.256 \text{ g}]]$$

$$PMI = 1.96$$

**Reaction mass efficiency (*RME*):**

$$RME = \text{Mass of product} / \sum(\text{Mass of stoichiometric reactants}) \times 100$$

$$RME = [0.256] / \sum[0.183 \text{ g} + 0.321 \text{ g}] \times 100$$

$$\text{RME} = 51.0 \%$$

**Atom economy (AE):**

$$AE = [MW \text{ of product}] \% \sum (MW \text{ of stoichiometric reactants}) \times 100$$

$$AE = [270.33] \% \sum [183.21 + 107.15] \times 100$$

$$AE = 93.10\%$$

**Carbon efficiency (CE):**

$$CE = [\text{Amount of carbon in product}] / [\text{Total carbon present in reactants}] \times 100$$

$$CE = [\text{no. of moles of product} \times \text{no. of carbons in product}] \times 100 / [\text{no. of moles} \times \text{no. of carbon} + (\text{no. of moles} \times \text{no. of carbon atoms})]$$

$$CE = [0.946 \times 19] \times 100 / [1 \times 12 + 3 \times 7]$$

$$CE = 54.46\%$$

**Chemical yield (CY):**

$$CY = [\text{Weight of product} \times \text{MW of starting material}] \times 100 / [\text{Weight of Starting material} \times \text{MW of Product}]$$

$$CY = [0.256 \text{ g} \times 183.21] \times 100 / [0.183 \times 270.33]$$

$$CY = 95.0 \%$$

**Mass intensity (MI):**

$$MI = \sum \text{Weight (Total materials input)} / [\text{Weight of Product}]$$

$$MI = \sum [(0.183 \text{ g} + 0.321 \text{ g}) / [0.256 \text{ g}]]$$

$$MI = 1.96$$

**Mass productivity (MP):**

$$MP = 100/MI$$

$$MP = 51.02 \%$$

**Optimum efficiency (OE):**

$$OE = [\text{RME}] \times 100/AE$$

$$OE = 55.0 \%$$

**Note:- The Reaction was performed with g-C<sub>3</sub>N<sub>4</sub> catalyst that was recovered and recycled. Hence the mass of the catalyst is excluded.**

**Calculation of Green chemistry metrics (GCM) for compound (3a) by Cu(OAc)<sub>2</sub>.H<sub>2</sub>O (reported ones).**

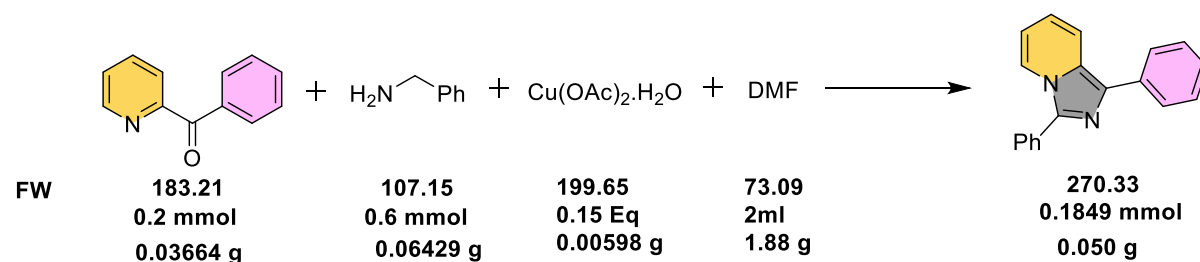

***E-factor*** = [Total mass of raw materials minus the total mass of product] / mass of product

***E-factor*** = [0.03664 g + 0.06429 g + 0.00598 g (Catalyst) + 1.88 g (DMF) - 0.050 g] / [0.050 g]

**E-Factor = 38.73**

***PMI*** =  $\sum$ (mass of stoichiometric reactants) / [Mass of product]

***PMI*** =  $\sum$ [(0.03664 g + 0.06429 g + 0.00598 g (Catalyst) + 1.88 g (DMF)] / [0.050 g]

**PMI = 39.73**

***RME*** = mass of product /  $\sum$ (mass of stoichiometric reactants)  $\times$  100

***RME*** = [0.050] /  $\sum$ [0.03664 g + 0.06429 g]  $\times$  100

**RME = 49.53%**

***AE*** = [MW of product] %  $\sum$ (MW of stoichiometric reactants)  $\times$  100

***AE*** = [270.33] %  $\sum$ [183.21 + 107.15 + 199.65(Catalyst) + 73.09 (DMF)]  $\times$  100

**AE = 48%**

***CE*** = [Amount of carbon in product] / [Total carbon present in reactants]  $\times$  100

***CE*** = [no. of moles of product  $\times$  no. of carbons in product]  $\times$  100 / [no. of moles  $\times$  no. of carbon + (no. of moles  $\times$  no. of carbon atoms + (no. of moles  $\times$  no. of carbon atoms)]

***CE*** = [0.1849  $\times$  19]  $\times$  100 / [0.2  $\times$  12 + 0.6  $\times$  7]

**CE = 53.23**

***CY*** = [Weight of product  $\times$  MW of starting material]  $\times$  100 / [Weight of Starting material  $\times$  MW of Product]

***CY*** = [0.050 g  $\times$  183.21]  $\times$  100 / [0.03664  $\times$  270.33]

**CY = 92.48%**

$$MI = \sum Weight \text{ (Total materials input)} / [\text{Weight of Product}]$$

$$MI = \sum [(0.03664 \text{ g} + 0.06429 \text{ g} + 0.00598 \text{ g}) / [0.050 \text{ g}]]$$

$$MI = 2.13$$

$$MP = 100/MI$$

$$MP = 45.0$$

$$OE = [RME] \times 100/AE$$

$$OE = 103.18$$

Calculation of Green chemistry metrics (GCM) for compound (3a) by I<sub>2</sub> (reported ones).

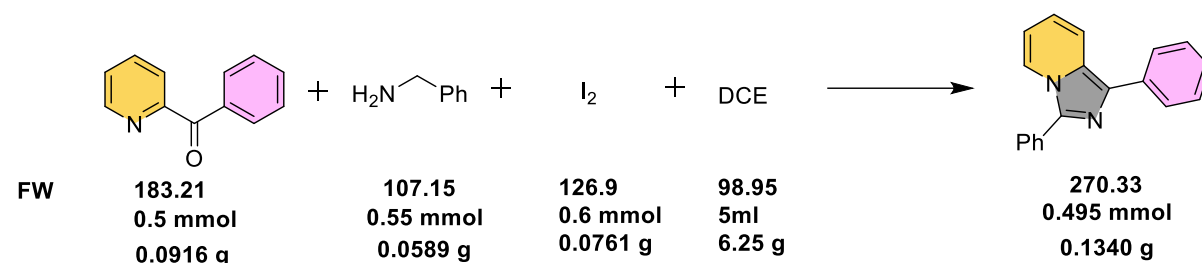

$$E\text{-factor} = [\text{Total mass of raw materials minus the total mass of product}] / \text{mass of product}$$

$$E\text{-factor} = [0.0916 \text{ g} + 0.0589 \text{ g} + 0.0761 \text{ g (I}_2\text{)} + 6.25 \text{ g (DCE)} - 0.1340 \text{ g}] / [0.1340 \text{ g}]$$

$$E\text{-Factor} = 47.33$$

$$PMI = \sum (\text{mass of stoichiometric reactants}) / [\text{Mass of product}]$$

$$PMI = \sum [(0.0916 \text{ g} + 0.0589 \text{ g} + 0.0761 \text{ g (I}_2\text{)} + 6.25 \text{ g (DCE)})] / [0.1340 \text{ g}]$$

$$PMI = 48.33$$

$$RME = \text{mass of product} / \sum (\text{mass of stoichiometric reactants}) \times 100$$

$$RME = [0.1340] / \sum [0.0916 \text{ g} + 0.0589 \text{ g}] \times 100$$

$$RME = 89.03 \%$$

$$AE = [MW \text{ of product}] \% \sum (MW \text{ of stoichiometric reactants}) \times 100$$

$$AE = [270.33] \% \sum [183.21 + 107.15 + 126.9(\text{I}_2) + 98.95 (\text{DCE})] \times 100$$

$$AE = 52.36 \%$$

$$CE = [\text{Amount of carbon in product}] / [\text{Total carbon present in reactants}] \times 100$$



$CE = [\text{no. of moles of product} \times \text{no. of carbons in product}] \times 100 / [\text{no. of moles} \times \text{no. of carbon} + (\text{no. of moles} \times \text{no. of carbon atoms})]$

$$CE = [0.495 \times 19] \times 100 / [0.5 \times 12 + 0.55 \times 7]$$

**CE = 95.48 %**

**Chemical yield (CY):**

$CY = [\text{Weight of product} \times \text{MW of starting material}] \times 100 / [\text{Weight of Starting material} \times \text{MW of Product}]$

$$CY = [0.1340 \text{ g} \times 183.21] \times 100 / [0.0916 \times 270.33]$$

**CY = 99.15 %**

**Mass intensity (MI):**

$MI = \sum \text{Weight (Total materials input)} / [\text{Weight of Product}]$

$$MI = \sum [(0.0916 \text{ g} + 0.0589 \text{ g} + 0.0761 \text{ g}) / [0.1340 \text{ g}]]$$

**MI = 1.69**

**Mass productivity (MP):**

$MP = 100 / MI$

**MP = 59.17**

**Optimum efficiency (OE):**

$OE = [\text{RME}] \times 100 / \text{AE}$

**OE = 170.03 %**

**Calculation of Green chemistry metrics (GCM) for compound (3a) by CuBr (reported ones).**

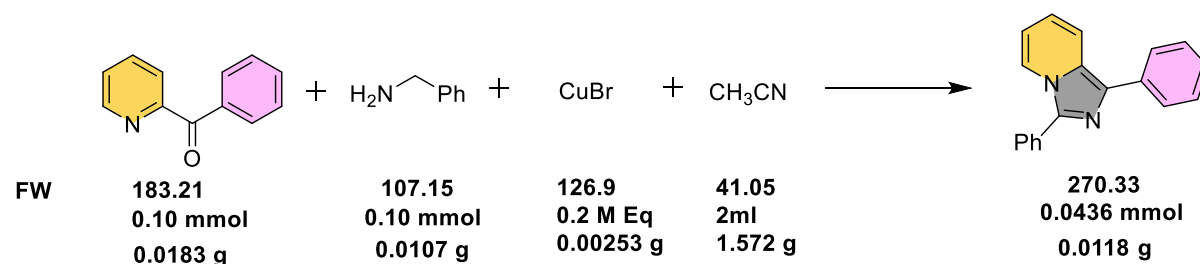

$E\text{-factor} = [\text{Total mass of raw materials minus the total mass of product}] / \text{mass of product}$

$$E\text{-factor} = [0.0183 \text{ g} + 0.0107 \text{ g} + 0.00253 \text{ g (CuBr)} + 1.572 \text{ g (CH}_3\text{CN)} - 0.0118 \text{ g}] / [0.0118 \text{ g}]$$

**E-Factor = 135**

$$PMI = \sum(\text{mass of stoichiometric reactants}) / [\text{Mass of product}]$$

$$PMI = \sum[(0.0183 \text{ g} + 0.0107 \text{ g} + 0.00253 \text{ g (CuBr)} + 1.572 \text{ g (CH}_3\text{CN)}] / [0.0118 \text{ g}]$$

**PMI = 136**

$$RME = \text{mass of product} / \sum(\text{mass of stoichiometric reactants}) \times 100$$

$$RME = [0.0118 \text{ g}] / \sum[0.0183 \text{ g} + 0.0107 \text{ g}] \times 100$$

**RME = 40.68 %**

$$AE = [\text{MW of product}] \% \sum(\text{MW of stoichiometric reactants}) \times 100$$

$$AE = [270.33 \text{ g/mol}] \% \sum[183.21 \text{ g/mol} + 107.15 \text{ g/mol} + 126.9 \text{ g/mol (CuBr)} + 41.05 \text{ g/mol (CH}_3\text{CN)}] \times 100$$

**AE = 59 %**

$$CE = [\text{Amount of carbon in product}] / [\text{Total carbon present in reactants}] \times 100$$

$$CE = [\text{no. of moles of product} \times \text{no. of carbons in product}] \times 100 / [\text{no. of moles} \times \text{no. of carbon} + (\text{no. of moles} \times \text{no. of carbon atoms})]$$

$$CE = [0.0436 \times 19] \times 100 / [0.1 \times 12 + 0.10 \times 7]$$

**CE = 43.6 %**

$$CY = [\text{Weight of product} \times \text{MW of starting material}] \times 100 / [\text{Weight of Starting material} \times \text{MW of Product}]$$

$$CY = [0.0118 \text{ g} \times 183.21 \text{ g/mol}] \times 100 / [0.0183 \text{ g} \times 270.33 \text{ g/mol}]$$

**CY = 43.72 %**

$$MI = \sum \text{Weight (Total materials input)} / [\text{Weight of Product}]$$

$$MI = \sum[(0.0183 \text{ g} + 0.0107 \text{ g} + 0.00253 \text{ g} + 1.572 \text{ g})] / [0.0118 \text{ g}]$$

**MI = 2.67**

$$MP = 100 / MI$$

**MP = 37.45 %**

$$OE = [RME] \times 100 / AE$$

**OE = 69 %**

Table S2. Comparison table for the synthesis of 1,3-diarylated Imidazo[1,5a] pyridines *compound 3a* by deploying other reported catalysts.

| Catalyst                               | T (°C) | Solvent            | Time | Catalyst Quantity                       | Base                 | Yield | Ref.         |
|----------------------------------------|--------|--------------------|------|-----------------------------------------|----------------------|-------|--------------|
| Cu(OAc) <sub>2</sub> .H <sub>2</sub> O | 110    | DMF                | 8 h  | 0.15 Eq                                 | -                    | 93    | 2            |
| I <sub>2</sub>                         | Reflux | DCE                | 6 h  | 0.0006 Eq                               | NaOAc<br>(0.0015 Eq) | 99    | 3            |
| CuBr                                   | 80     | CH <sub>3</sub> CN | 24 h | 20 mol %                                | -                    | 42    | 4            |
| g-C <sub>3</sub> N <sub>4</sub>        | RT     | -                  | 10 h | g-C <sub>3</sub> N <sub>4</sub> (50 mg) | -                    | 95    | Present work |

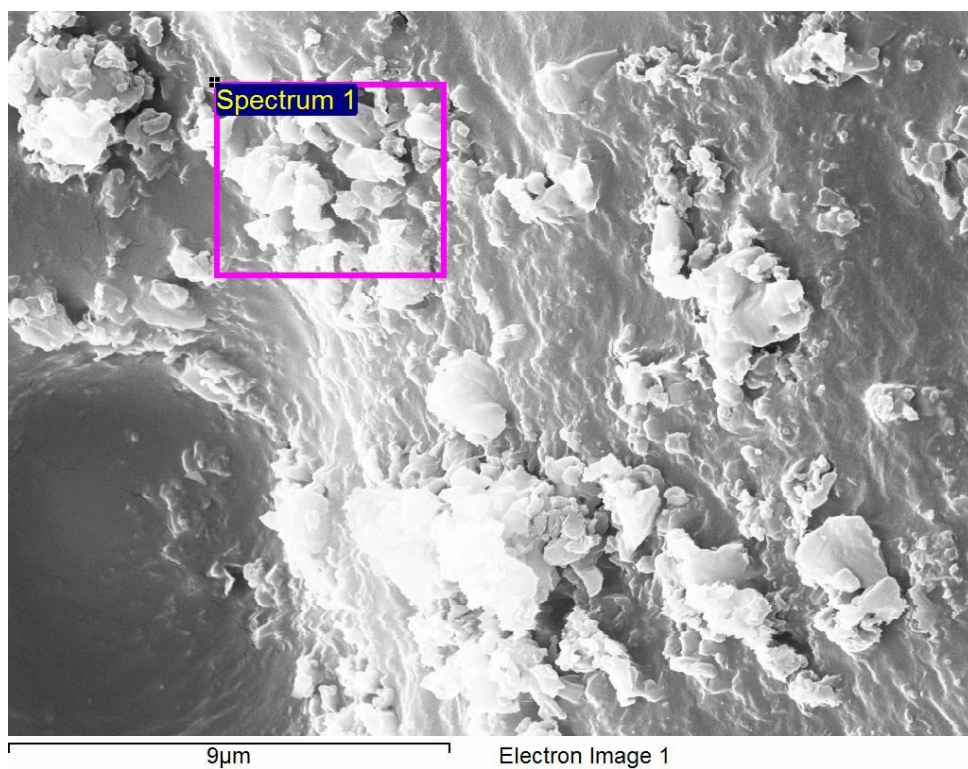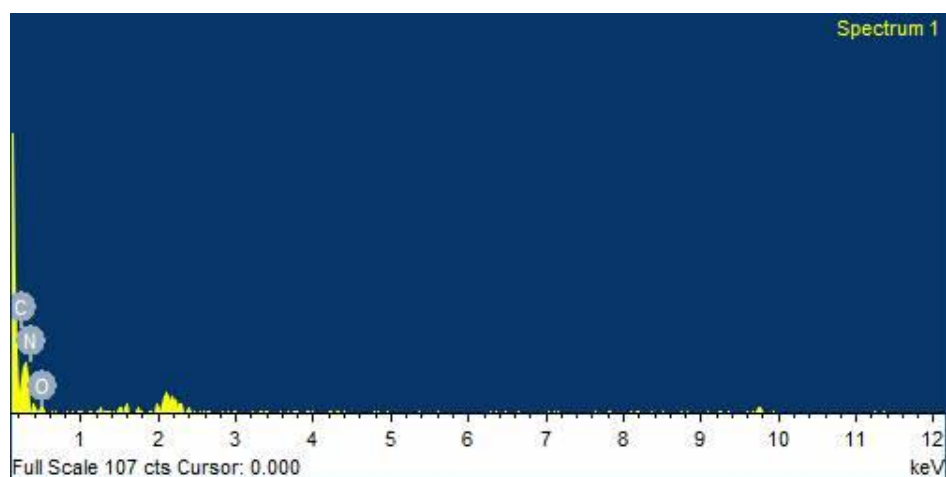

Figure S10. SEM-EDX spectrum of reused  $g\text{-C}_3\text{N}_4$  (C = 31.72 %, N = 48.06 %, O = 20.22 %).

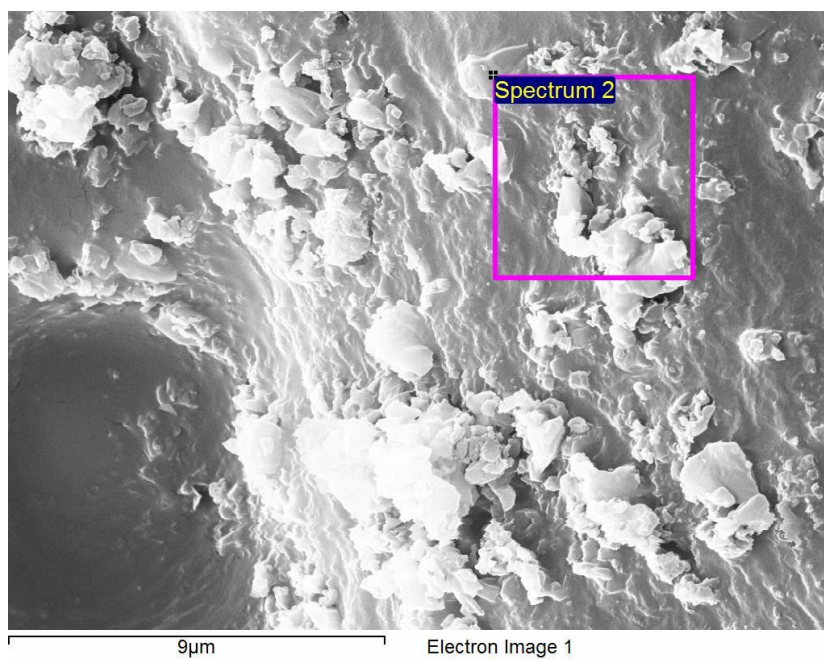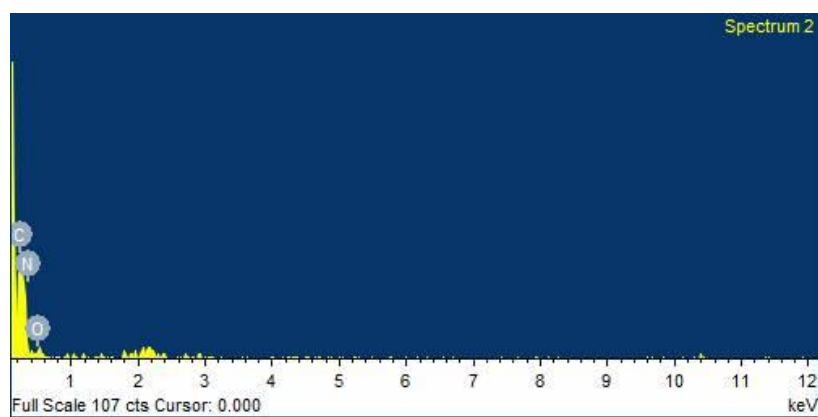

Figure S11. SEM-EDX spectrum of reused g-C<sub>3</sub>N<sub>4</sub> (C = 56.16 %, N = 28.45 %, O = 15.39 %).

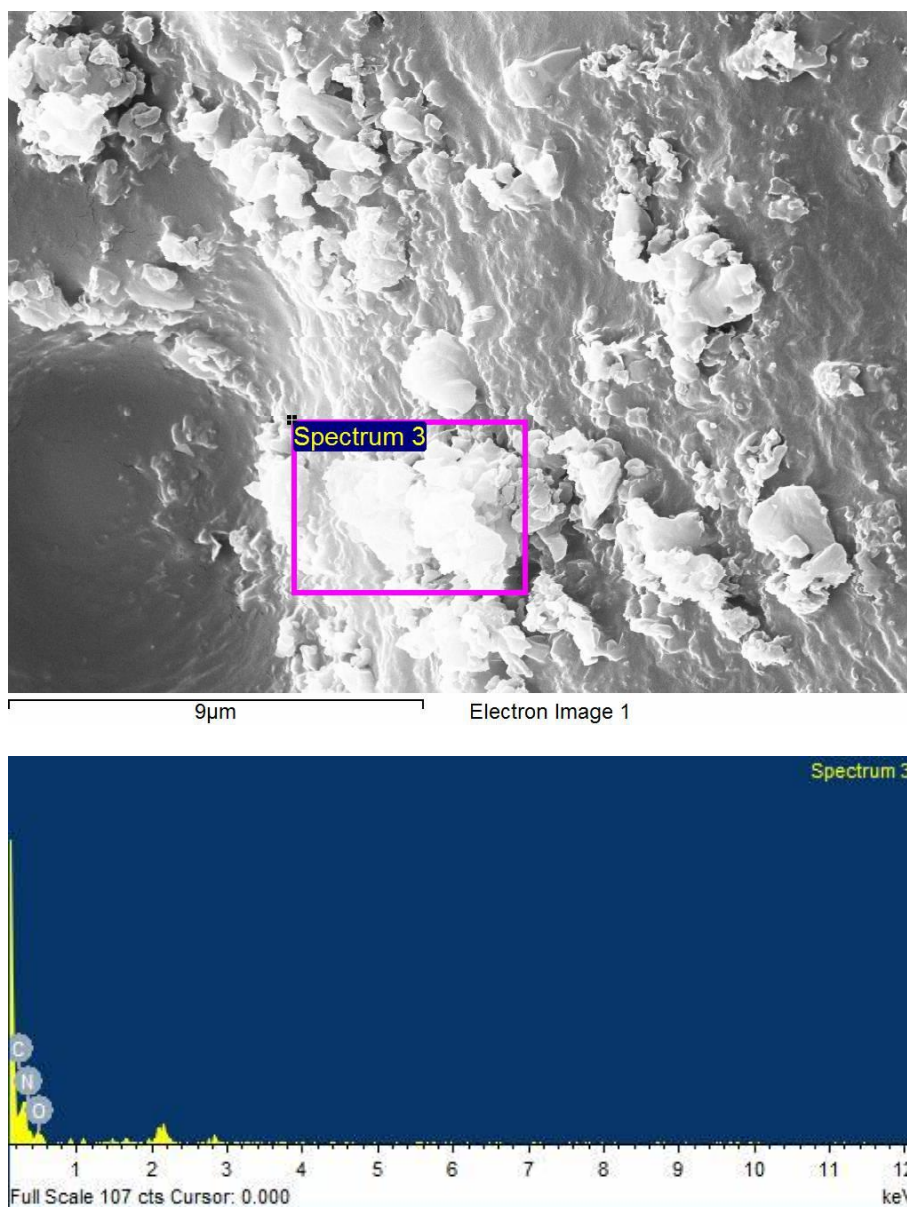

Figure S12. SEM-EDX spectrum of reused g-C<sub>3</sub>N<sub>4</sub> (C = 27.04 %, N = 44.68 %, O = 28.28 %).

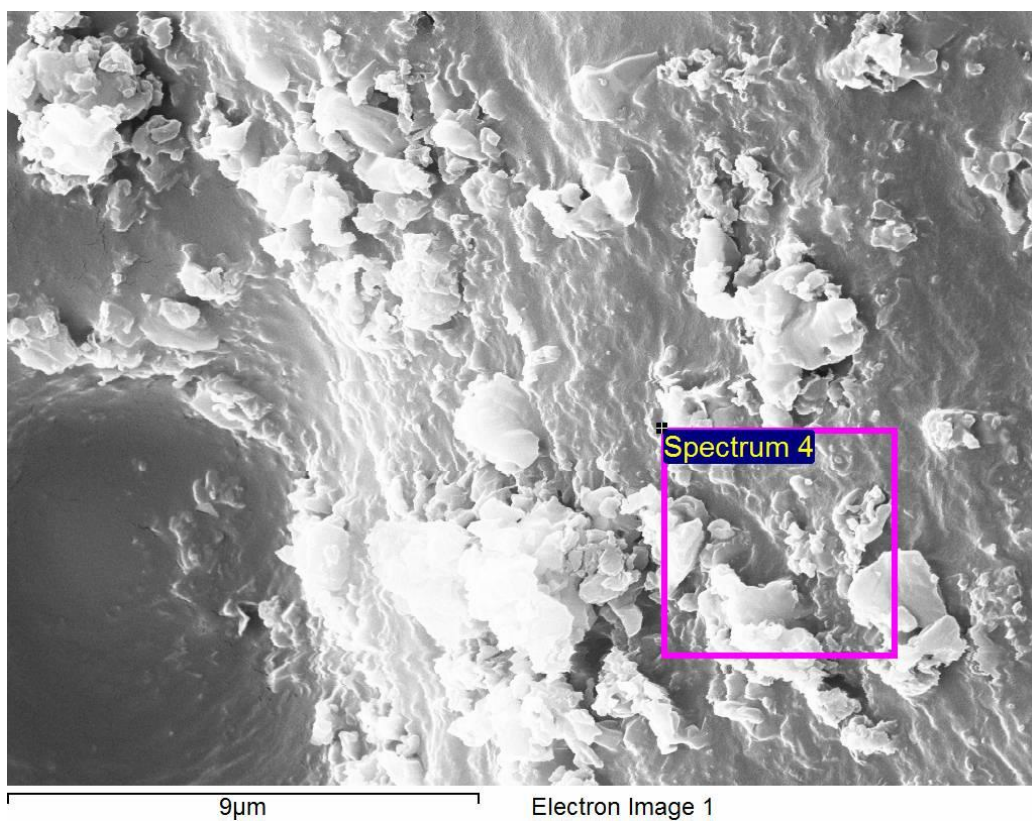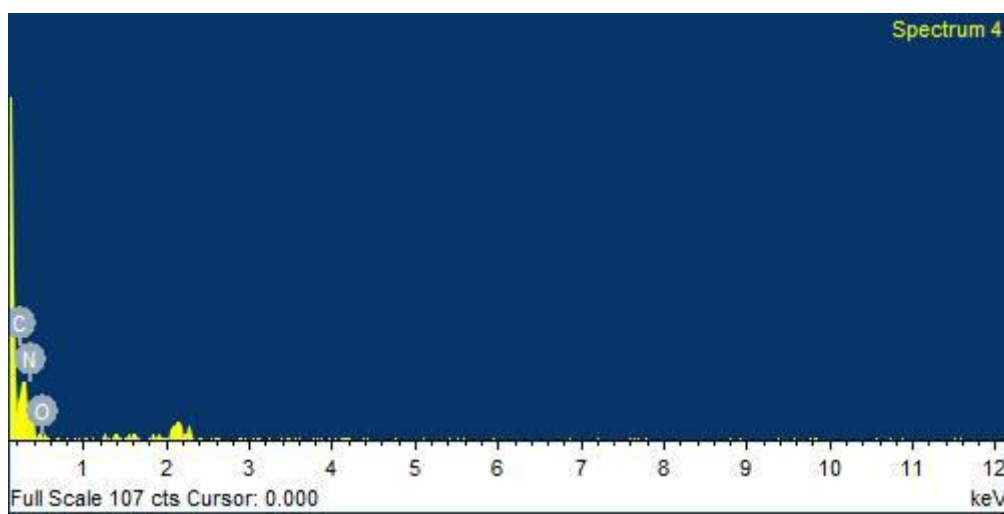

Figure S13. SEM-EDX spectrum of reused g-C<sub>3</sub>N<sub>4</sub> (C = 30.13 %, N = 51.71 %, O = 18.15 %).

### Synthesis and Structural characterization of Compounds 3a to Compound 3v

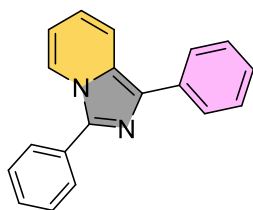

In a 20 mL glass vial, *phenyl(pyridin-2-yl)methanone* (0.183 g, 1 mmol), *benzyl amine* (0.321, 3 mmol), *g-C<sub>3</sub>N<sub>4</sub>* (50 mg) were added at room temperature (RT). The reaction mixture (RM) was stirred under visible light irradiation (60 W) for 10 h. After the reaction completion, the resulting reaction mass was extracted with EtOAc (3 × 10 mL) and dried with sodium sulphate. The obtained filtrate was concentrated under reduced pressure. The obtained crude material was further purified by column chromatography (90-10% hexane:ethyl acetate) to afford the desired product (*Yellow solid*). (**Compound 3a**).

**1,3-Diphenylimidazo[1,5-a]pyridine (Compound 3a)<sup>2</sup>**: LCMS 97.98%(254 nm) (ES<sup>+</sup>) calcd for C<sub>19</sub>H<sub>14</sub>N<sub>2</sub><sup>+</sup>, 270.11; found, 271.2 (MH<sup>+</sup>). <sup>1</sup>H NMR (600 MHz, CDCl<sub>3</sub>) δ 8.21 (d, *J* = 7.2 Hz, 1H), 7.94 (d, *J* = 7.8 Hz, 2H), 7.87 (d, *J* = 9.6 Hz, 1H), 7.81 (d, *J* = 8.4 Hz, 2H), 7.53 (d, *J* = 8.4 Hz, 2H), 7.49 (t, *J* = 7.2 Hz, 2H), 7.33 (t, *J* = 7.2 Hz, 1H), 6.82-6.84 (m, 1H), 6.63 (t, *J* = 6.6 Hz, 1H). <sup>13</sup>C NMR (151 MHz, CDCl<sub>3</sub>) δ 138.14, 134.97, 132.02, 130.18, 129.03, 128.83, 128.73, 128.34, 126.85, 126.55, 121.78, 119.71, 119.18, 113.24.

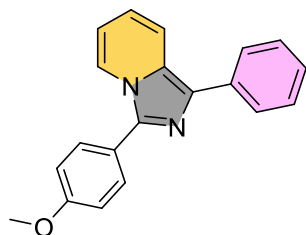

In a 20 mL glass vial, *phenyl(pyridin-2-yl)methanone* (0.183 g, 1 mmol), *4-methoxy benzyl amine* (0.411 g, 3 mmol), *g-C<sub>3</sub>N<sub>4</sub>* (50 mg) were added at room temperature (RT). The reaction mixture (RM) was stirred under visible light irradiation (60 W) for 10 h. After the reaction completion, the resulting reaction mass was extracted with EtOAc (3 × 10 mL) and dried with sodium sulphate. The obtained filtrate was concentrated under reduced pressure. The obtained crude material was further purified by column chromatography (90-10% hexane:ethyl acetate) to afford the desired product (*Yellow solid*). (**Compound 3b**).

**3-(4-Methoxyphenyl)-1-phenylimidazo[1,5-a]pyridine (Compound 3b)<sup>2</sup>**: LCMS 93.66%(220 nm) (ES<sup>+</sup>) calcd for C<sub>20</sub>H<sub>16</sub>N<sub>2</sub>O<sup>+</sup>, 300.12; found, 301.2 (MH<sup>+</sup>). <sup>1</sup>H NMR (600 MHz, CDCl<sub>3</sub>) δ 8.18 (d, *J* = 7.2 Hz, 1H), 7.95 (d, *J* = 7.2 Hz, 2H), 7.84 (d, *J* = 9 Hz, 1H), 7.77 (d, *J* = 9.0 Hz, 2H), 7.48 (t, *J* = 7.8 Hz, 2H), 7.31 (t, *J* = 7.2 Hz, 1H), 7.08 (d, *J* = 8.4 Hz, 2H), 6.79-6.77 (m, 1H), 6.57 (t, *J* = 6.6 Hz, 1H), 3.90 (s, 3H). <sup>13</sup>C NMR(151MHz,CDCl<sub>3</sub>)δ160.05,138.15,135.05,131.65,129.81,128.71,127.36,126.77,126.45,122.62,121.76,119.44,119.13,114.47,113 03, 55.43.



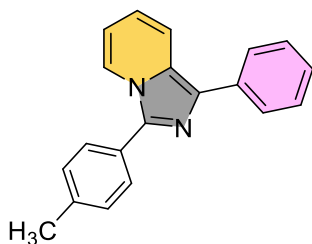

In a 30 mL glass vial, *phenyl(pyridin-2-yl)methanone* (0.183 g, 1 mmol), *4-methylbenzyl amine* (0.363 g, 3 mmol), *g-C<sub>3</sub>N<sub>4</sub>* (50 mg) were added at room temperature (RT). The reaction mixture (RM) was stirred under visible light irradiation (60 W) for 10 h. After the reaction completion, the resulting reaction mass was extracted with EtOAc (3×10 mL) and dried with sodium sulphate. The obtained filtrate was concentrated under reduced pressure. The obtained crude material was further purified by column chromatography (90-10% hexane:ethyl acetate) to afford the desired product (*Yellow solid*). (**Compound 3c**).

**1-Phenyl-3-p-tolylimidazo[1,5-a]pyridine (Compound 3c)<sup>2</sup>**. LCMS 97.14%(254 nm) (ES+) calcd for C<sub>20</sub>H<sub>16</sub>N<sub>2</sub><sup>+</sup>, 284.13; found, 285.2 (MH<sup>+</sup>). <sup>1</sup>H NMR (600 MHz, CDCl<sub>3</sub>) δ 8.22 (*d*, *J* = 7.2 Hz, 1H), 7.96 (*d*, *J* = 7.8 Hz, 2H), 7.85 (*d*, *J* = 9 Hz, 1H), 7.75 (*d*, *J* = 7.8 Hz, 2H), 7.49 (*t*, *J* = 7.8 Hz, 2H), 7.36 (*d*, *J* = 7.8 Hz, 2H), 7.32 (*t*, *J* = 7.2 Hz, 1H), 6.77-6.80 (*m*, 1H), 6.57 (*t*, *J* = 6.6 Hz, 1H), 2.46 (*s*, 3H). <sup>13</sup>C NMR (151 MHz, CDCl<sub>3</sub>) δ 138.84, 138.32, 135.05, 131.82, 129.70, 128.72, 128.25, 127.55, 127.28, 126.81, 126.48, 121.85, 119.56, 119.12, 113.09, 21.46.

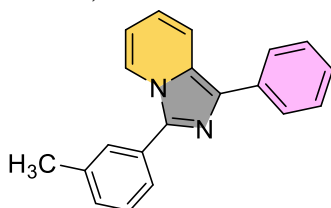

In a 30 mL glass vial, *phenyl(pyridin-2-yl)methanone* (0.183 g, 1 mmol), *3-methylbenzyl amine* (0.363 g, 3 mmol), *g-C<sub>3</sub>N<sub>4</sub>* (50 mg) were added at room temperature (RT). The reaction mixture (RM) was stirred under visible light irradiation (60 W) for 10 h. After the reaction completion, the resulting reaction mass was extracted with EtOAc (3×10 mL) and dried with sodium sulphate. The obtained filtrate was concentrated under reduced pressure. The obtained crude material was further purified by column chromatography (90-10% hexane:ethyl acetate) to afford the desired product (*Yellow solid*). (**Compound 3d**).

**1-Phenyl-3-m-tolylimidazo[1,5-a]pyridine (Compound 3d)<sup>2</sup>**. Mass LCMS 100%(210 nm) (ES+) calcd for C<sub>20</sub>H<sub>16</sub>N<sub>2</sub><sup>+</sup>, 284.13; found, 285.2 (MH<sup>+</sup>). <sup>1</sup>H NMR (600 MHz, CDCl<sub>3</sub>) δ 8.25 (*d*, *J* = 7.2 Hz, 1H), 7.97 (*d*, *J* = 7.8 Hz, 2H), 7.85 (*d*, *J* = 9 Hz, 1H), 7.70(*s*, 1H), 7.64 (*d*, *J* = 7.2 Hz, 1H), 7.49 (*t*, *J* = 7.2 Hz, 2H), 7.44 (*t*, *J* = 7.8 Hz, 1H), 7.33 (*t*, *J* = 7.2 Hz, 1H), 7.28-7.30 (*m*, 1H), 6.78-6.80 (*m*, 1H), 6.58 (*t*, *J* = 6.6 Hz, 1H), 2.48 (*s*, 3H). <sup>13</sup>C NMR (151 MHz, CDCl<sub>3</sub>) δ 138.92, 138.32, 135.02, 131.92, 130.05, 129.65, 129.24, 128.8, 127.62, 126.83, 126.51, 125.11, 121.89, 119.64, 119.12, 113.14, 21.52.

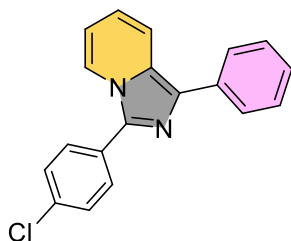

In a 30 mL glass vial, *phenyl(pyridin-2-yl)methanone* (0.183g, 1 mmol), *4-chloro benzyl amine* (0.424g, 3 mmol), *g-C<sub>3</sub>N<sub>4</sub>* (50 mg) were added at room temperature (RT). The reaction mixture (RM) was stirred under visible light irradiation (60 W) for 10 h. After the reaction completion, the resulting reaction mass was extracted with EtOAc (3×10 mL) and dried with sodium sulphate. The obtained filtrate was concentrated under reduced pressure. The obtained crude material was further purified by column chromatography (90-10% hexane:ethyl acetate) to afford the desired product (*Yellow solid*). (**Compound 3e**).

**3-(4-Chlorophenyl)-1-phenylimidazo[1,5-a]pyridine (Compound 3e)**<sup>2</sup>. LCMS 100% (210 nm) (ES<sup>+</sup>) calcd for C<sub>19</sub>H<sub>13</sub>ClN<sub>2</sub><sup>+</sup>, 304.07; found, 305.2 (MH<sup>+</sup>). <sup>1</sup>H NMR (600 MHz, CDCl<sub>3</sub>) δ 8.21 (*d*, *J* = 7.2 Hz, 1H), 7.94 (*d*, *J* = 7.8 Hz, 2H), 7.87 (*d*, *J* = 9.6 Hz, 1H), 7.81 (*d*, *J* = 8.4 Hz, 2H), 7.53 (*d*, *J* = 8.4 Hz, 2H), 7.49 (*t*, *J* = 7.2 Hz, 2H), 7.33 (*t*, *J* = 7.2 Hz, 1H), 6.82-6.84 (*m*, 1H), 6.63 (*t*, *J* = 6.6 Hz, 1H). <sup>13</sup>C NMR (151 MHz, CDCl<sub>3</sub>) δ 136.93, 134.76, 132.33, 129.4, 129.18, 128.72, 128.47, 127.90, 126.80, 121.45, 119.81, 119.28, 113.61.

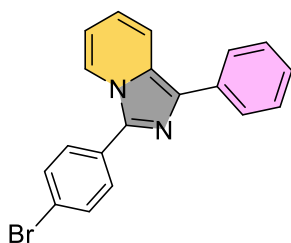

In a 30 mL glass vial, *phenyl(pyridin-2-yl)methanone* (0.183 g, 1 mmol), *4-bromo benzyl amine* (0.558 g, 3 mmol), *g-C<sub>3</sub>N<sub>4</sub>* (50 mg) were added at room temperature (RT). The reaction mixture (RM) was stirred under visible light irradiation (60 W) for 10 h. After the reaction completion, the resulting reaction mass was extracted with EtOAc (3×10 mL) and dried with sodium sulphate. The obtained filtrate was concentrated under reduced pressure. The obtained crude material was further purified by column chromatography (90-10% hexane:ethyl acetate) to afford the desired product (*Yellow solid*). (**Compound 3f**).

**3-(4-Bromophenyl)-1-phenylimidazo[1,5-a]pyridine (Compound 3f)**<sup>7</sup>. <sup>1</sup>H NMR (600 MHz, CDCl<sub>3</sub>) δ 8.21 (*d*, *J* = 7.2 Hz, 1H), 7.94 (*d*, *J* = 7.8 Hz, 2H), 7.87 (*d*, *J* = 9 Hz, 1H), 7.75 (*d*, *J* = 8.4 Hz, 2H), 7.69 (*d*, *J* = 9.0 Hz, 2H), 7.49 (*t*, *J* = 7.8 Hz, 2H), 7.33 (*t*, *J* = 7.2 Hz, 1H), 6.82-6.84 (*m*, 1H), 6.63 (*t*, *J* = 7.2 Hz, 1H). <sup>13</sup>C NMR (151 MHz, CDCl<sub>3</sub>) δ 136.93, 134.74, 132.38, 132.23, 129.69, 129.38, 129.11, 128.78, 128.39, 127.9, 126.8, 122.83, 121.53, 119.89, 119.29, 113.65.

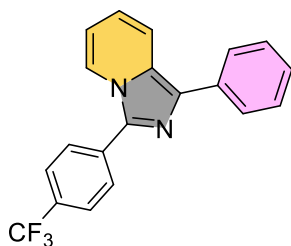

In a 30 mL glass vial, *phenyl(pyridin-2-yl)methanone* (0.183g, 1 mmol), *4-trifluoromethyl* (0.525 g, 3 mmol), *g-C<sub>3</sub>N<sub>4</sub>* (50 mg) were added at room temperature (RT). The reaction mixture (RM) was stirred under visible light irradiation (60 W) for 10 h. After the reaction completion, the resulting reaction mass was extracted with EtOAc (3×10 mL) and dried with sodium sulphate. The obtained filtrate was concentrated under reduced pressure. The obtained crude material was further purified by column chromatography (90-10% hexane:ethyl acetate) to afford the desired product (*Yellow solid*). (**Compound 3g**).

**1-Phenyl-3-(4-(trifluoromethyl)phenyl)imidazo[1,5-a]pyridine (Compound 3g)<sup>2</sup>.** <sup>1</sup>H NMR (600 MHz, CDCl<sub>3</sub>) δ 8.28 (d, J = 7.8 Hz, 1H), 8.02 (d, J = 8.4 Hz, 2H), 7.95 (d, J = 7.2 Hz, 2H), 7.90 (d, J = 9 Hz, 1H), 7.81 (d, J = 7.8 Hz, 2H), 7.50 (t, J = 7.8 Hz, 2H), 7.35 (t, J = 7.8 Hz, 1H), 6.86 (dd, J = 9.6, 6.6 Hz, 1H), 6.67 (t, J = 7.8 Hz, 1H). <sup>13</sup>C NMR (151 MHz, CDCl<sub>3</sub>) δ 136.48, 134.64, 133.71, 132.86, 130.37 (q, J = 32.6 Hz), 128.82, 128.32, 128.25, 126.87, 126.00 (q, J = 3.7 Hz), 124.02 (d, J = 272.1 Hz), 121.49, 120.21, 119.37, 122.15, 119.65, 113.95.

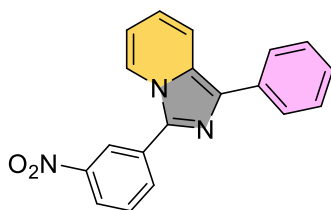

In a 30 mL glass vial, *phenyl(pyridin-2-yl)methanone* (0.183 g, 1 mmol), *3-nitrobenzyl amine* (0.456 g, 3 mmol), *g-C<sub>3</sub>N<sub>4</sub>* (50 mg) were added at room temperature (RT). The reaction mixture (RM) was stirred under visible light irradiation (60 W) for 10 h. After the reaction completion, the resulting reaction mass was extracted with EtOAc (3×10 mL) and dried with sodium sulphate. The obtained filtrate was concentrated under reduced pressure. The obtained crude material was further purified by column chromatography (90-10% hexane:ethyl acetate) to afford the desired product (*Yellow orange solid*). (**Compound 3h**)<sup>7</sup>.

**3-(3-nitrophenyl)-1-phenylimidazo[1,5-a]pyridine (Compound 3h).** <sup>1</sup>H NMR (600 MHz, CDCl<sub>3</sub>) δ 8.75 (s, 1H), 8.26-8.31 (m, 3H), 7.91-7.95 (m, 3H), 7.74 (t, J = 7.8 Hz, 1H), 7.51 (t, J = 6.6 Hz, 2H), 7.36 (t, J = 6.6 Hz, 1H), 6.91 (t, J = 7.2 Hz, 1H), 6.74 (s, 1H). <sup>13</sup>C NMR (151 MHz, CDCl<sub>3</sub>) δ 148.66, 133.96, 131.93, 130.21, 128.87, 127.03, 126.87, 123.17, 122.39, 121.25, 120.51, 119.51, 114.47.

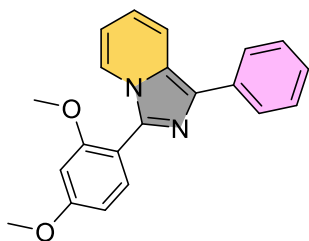

In a 30 mL glass vial, *phenyl(pyridin-2-yl)methanone* (0.183 g, 1 mmol), 2, 4 dimethoxy benzyl amine (0.501 g, 3 mmol), *g-C<sub>3</sub>N<sub>4</sub>* (50 mg) were added at room temperature (RT). The reaction mixture (RM) was stirred under visible light irradiation (60 W) for 10 h. After the reaction completion, the resulting reaction mass was extracted with EtOAc (3×10 mL) and dried with sodium sulphate. The obtained filtrate was concentrated under reduced pressure. The obtained crude material was further purified by column chromatography (90-10% hexane:ethyl acetate) to afford the desired product (*Pale yellow solid*). (**Compound 3i**).

**3-(3-nitrophenyl)-1-phenylimidazo[1,5-a]pyridine (Compound 3i).** <sup>1</sup>H NMR (600 MHz, CDCl<sub>3</sub>) δ 7.97 (d, J = 8.4 Hz, 2H), 7.86 (d, J = 9 Hz, 1H), 7.60 (t, J = 7.2 Hz, 2H), 7.47 (t, J = 7.8 Hz, 2H), 7.29 (t, J = 7.2 Hz, 1H), 6.79-6.83 (m, 1H), 6.68 (dd, J = 1.8 Hz, 1H), 6.62 (d, J = 2.4 Hz, 1H), 6.53 (t, J = 7.2 Hz, 1H), 3.90 (s, 1H), 3.81 (s, 1H). <sup>13</sup>C NMR (151 MHz, CDCl<sub>3</sub>) δ 162.18, 158.64, 136.19, 135.27, 133.57, 131.16, 128.63, 127.24, 126.72, 126.19, 123.46, 119.41, 118.61, 111.8, 105.30, 98.79, 55.58.

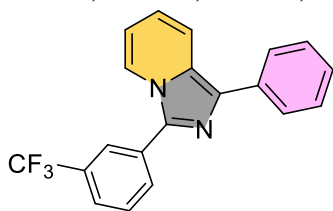

In a 30 mL glass vial, *phenyl(pyridin-2-yl)methanone* (0.183 g, 1 mmol), 3-trifluoromethyl benzyl amine (0.525, 3 mmol), *g-C<sub>3</sub>N<sub>4</sub>* (50 mg) were added at room temperature (RT). The reaction mixture (RM) was stirred under visible light irradiation (60 W) for 10 h. After the reaction completion, the resulting reaction mass was extracted with EtOAc (3×10 mL) and dried with sodium sulphate. The obtained filtrate was concentrated under reduced pressure. The obtained crude material was further purified by column chromatography (90-10% hexane:ethyl acetate) to afford the desired product (*Yellow solid*). (**Compound 3j**).

**1-Phenyl-3-(3-(trifluoromethyl)phenyl)imidazo[1,5-a]pyridine (Compound 3j)**<sup>3</sup>. <sup>1</sup>H NMR (600 MHz, CDCl<sub>3</sub>) δ 8.24 (d, J = 7.2 Hz, 1H), 8.16 (s, 1H), 8.06 (d, J = 7.2 Hz, 1H), 7.95 (d, J = 7.8 Hz, 2H), 7.89 (d, J = 9 Hz, 1H), 7.72 (d, J = 7.8 Hz, 1H), 7.68 (t, J = 7.8 Hz, 1H), 7.51 (t, J = 7.8 Hz, 2H), 7.35 (t, J = 7.8 Hz, 1H), 6.85-6.87 (m, 1H), 6.67 (t, J = 6.6 Hz, 1H). <sup>13</sup>C NMR (151 MHz, CDCl<sub>3</sub>) δ 136.45, 134.64, 132.66, 131.68 (t, J = 32.7 Hz), 131.24, 131.07, 129.59, 128.83, 128.14, 126.87, 126.84, 125.32 (q, J = 3.9 Hz), 125.07 (q, J = 3.7 Hz), 123.93 (d, J = 272.8 Hz), 121.33, 121.23, 120.15, 119.36, 113.97.

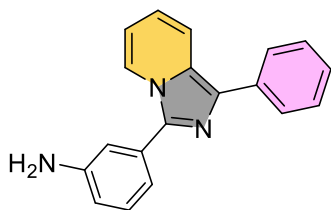

In a 30 mL glass vial, *phenyl(pyridin-2-yl)methanone* (0.183 g, 1 mmol), *3-amino benzyl amine* (0.366 g, 3 mmol), *g-C<sub>3</sub>N<sub>4</sub>* (50 mg) were added at room temperature (RT). The reaction mixture (RM) was stirred under visible light irradiation (60 W) for 10 h. After the reaction completion, the resulting reaction mass was extracted with EtOAc (3×10 mL) and dried with sodium sulphate. The obtained filtrate was concentrated under reduced pressure. The obtained crude material was further purified by column chromatography (90-10% hexane:ethyl acetate) to afford the desired product (*Yellow solid*). (**Compound 3k**).

**3-(1-phenylimidazo[1,5-a]pyridin-3-yl)aniline (Compound 3k)**. <sup>1</sup>H NMR (600 MHz, CDCl<sub>3</sub>) δ 8.27 (d, J = 7.2 Hz, 1H), 7.95 (d, J = 7.2 Hz, 2H), 7.84 (d, J = 9.6 Hz, 1H), 7.48 (t, J = 7.8 Hz, 2H), 7.31 (t, J = 7.8 Hz, 2H), 7.18 (t, J = 7.2 Hz, 2H), 6.76-6.80 (m, 2H), 6.56 (t, J = 6.6 Hz, 1H), 3.85 (s, 2H). <sup>13</sup>C NMR (151 MHz, CDCl<sub>3</sub>) δ 147.20, 138.36, 135.00, 131.75, 131.01, 129.81, 128.72, 127.61, 126.82, 126.49, 122.16, 119.65, 119.05, 117.98, 115.62, 115.13, 113.04.

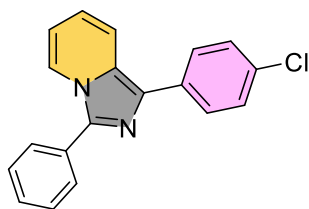

In a 30 mL glass vial, *(4-chlorophenyl)(pyridin-2-yl)methanone* (0.217 g, 1 mmol), *benzyl amine* (0.321 g, 3 mmol), *g-C<sub>3</sub>N<sub>4</sub>* (50 mg) were added at room temperature (RT). The reaction mixture (RM) was stirred under visible light irradiation (60 W) for 10 h. After the reaction completion, the resulting reaction mass was extracted with EtOAc (3×10 mL) and dried with sodium sulphate. The obtained filtrate was concentrated under reduced pressure. The obtained crude material was further purified by column chromatography (90-10% hexane:ethyl acetate) to afford the desired product (*Yellow solid*). (**Compound 3l**).

**1-(4-Chlorophenyl)-3-phenylimidazo[1,5-a]pyridine (Compound 3l)**<sup>3</sup>. LCMS 98.26% (254 nm) (ES<sup>+</sup>) calcd for C<sub>19</sub>H<sub>13</sub>ClN<sub>2</sub><sup>+</sup>, 304.07; found, 305.2 (MH<sup>+</sup>). <sup>1</sup>H NMR (600 MHz, CDCl<sub>3</sub>) δ 8.26 (s, 1H), 7.89 (d, J = 5.4 Hz, 2H), 7.82-7.84 (m, 3H), 7.56 (s, 2H), 7.45-7.48 (m, 3H), 6.83 (s, 1H), 6.61 (s, 1H). <sup>13</sup>C NMR (151 MHz, CDCl<sub>3</sub>) δ 138.32, 133.52, 132.10, 130.77, 129.99, 129.07, 128.97, 128.86, 128.33, 127.86, 127.75, 121.91, 120.14, 118.87, 113.31.

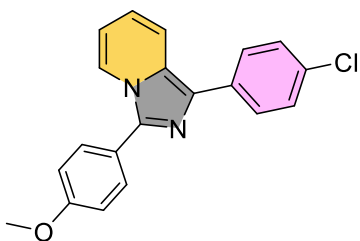

In a 30 mL glass vial, (4-chlorophenyl)(pyridin-2-yl)methanone (0.217 g, 1 mmol), 4-methoxy benzylamine (0.411 g, 3 mmol),  $g\text{-C}_3\text{N}_4$  (50 mg) were added at room temperature (RT). The reaction mixture (RM) was stirred under visible light irradiation (60 W) for 10 h. After the reaction completion, the resulting reaction mass was extracted with EtOAc ( $3 \times 10$  mL) and dried with sodium sulphate. The obtained filtrate was concentrated under reduced pressure. The obtained crude material was further purified by column chromatography (90-10% hexane:ethyl acetate) to afford the desired product (*Yellow solid*). (**Compound 3m**).

**1-(4-chlorophenyl)-3-(4-methoxyphenyl)imidazo[1,5-a]pyridine (Compound 3m)**. LCMS 97.25% (210 nm) ( $\text{ES}^+$ ) calcd for  $\text{C}_{20}\text{H}_{15}\text{ClN}_2\text{O}^+$ , 334.08; found, 335.2 ( $\text{MH}^+$ ).  $^1\text{H NMR}$  (600 MHz,  $\text{CDCl}_3$ )  $\delta$  8.18 (*d*,  $J = 7.2$  Hz, 1H), 7.89 (*d*,  $J = 8.4$  Hz, 2H), 7.75-7.79 (*m*, 3H), 7.44 (*d*,  $J = 8.4$  Hz, 2H), 7.08 (*d*,  $J = 8.4$  Hz, 2H), 6.79-6.82 (*m*, 1H), 6.58 (*t*,  $J = 7.2$  Hz, 1H), 3.90 (*s*, 3H).  $^{13}\text{C NMR}$  (151 MHz,  $\text{CDCl}_3$ )  $\delta$  160.17, 138.35, 133.63, 131.99, 130.42, 129.81, 128.84, 127.82, 127.46, 122.44, 121.90, 119.88, 118.84, 114.53, 113.10, 55.43.

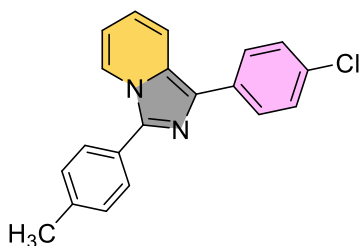

In a 30 mL glass vial, (4-chlorophenyl)(pyridin-2-yl)methanone (0.217 g, 1 mmol), 4-methyl benzylamine (0.363 g, 3 mmol),  $g\text{-C}_3\text{N}_4$  (50 mg) were added at room temperature (RT). The reaction mixture (RM) was stirred under visible light irradiation (60 W) for 10 h. After the reaction completion, the resulting reaction mass was extracted with EtOAc ( $3 \times 10$  mL) and dried with sodium sulphate. The obtained filtrate was concentrated under reduced pressure. The obtained crude material was further purified by column chromatography (90-10% hexane:ethyl acetate) to afford the desired product (*Yellow solid*). (**Compound 3n**).

**1-(4-chlorophenyl)-3-(p-tolyl)imidazo[1,5-a]pyridine (Compound 3n)**. LCMS 100% (210 nm) ( $\text{ES}^+$ ) calcd for  $\text{C}_{20}\text{H}_{15}\text{ClN}_2^+$ , 318.09; found, 319.2 ( $\text{MH}^+$ ).  $^1\text{H NMR}$  (600 MHz,  $\text{CDCl}_3$ )  $\delta$  8.22 (*d*,  $J = 7.2$  Hz, 1H), 7.89 (*d*,  $J = 8.4$  Hz, 2H), 7.78 (*d*,  $J = 9$  Hz, 1H), 7.72 (*d*,  $J = 7.8$  Hz, 2H), 7.44 (*d*,  $J = 8.4$  Hz, 2H), 7.36 (*d*,  $J = 7.8$  Hz, 2H), 6.79-6.82 (*m*, 1H), 6.58 (*t*,  $J = 7.2$  Hz, 1H), 2.46 (*s*, 3H).  $^{13}\text{C NMR}$  (151 MHz,  $\text{CDCl}_3$ )  $\delta$  139.01, 138.50, 133.61, 132.01, 130.57, 129.74, 128.84, 128.24, 127.85, 127.62, 127.10, 121.99, 119.99, 118.83, 113.15, 21.44.

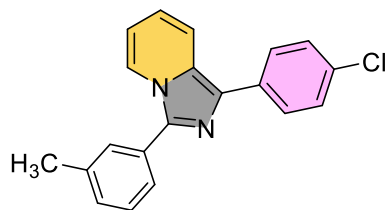

In a 30 mL glass vial, (4-chlorophenyl)(pyridin-2-yl)methanone (0.217 g, 1 mmol), 3-methyl benzyl amine (0.363 g, 3 mmol),  $g\text{-C}_3\text{N}_4$  (50 mg) were added at room temperature (RT). The reaction mixture (RM) was stirred under visible light irradiation (60 W) for 10 h. After the reaction completion, the resulting reaction mass was extracted with EtOAc ( $3 \times 10$  mL) and dried with sodium sulphate. The obtained filtrate was concentrated under reduced pressure. The obtained crude material was further purified by column chromatography (90-10% hexane:ethyl acetate) to afford the desired product (*Yellow solid*). (**Compound 3o**).

**1-(4-chlorophenyl)-3-(m-tolyl)imidazo[1,5-a]pyridine (Compound 3o)**. LCMS 100% (210 nm) (ES+) calcd for  $\text{C}_{20}\text{H}_{15}\text{ClN}_2^+$ , 318.09; found, 319.2 (MH<sup>+</sup>).  $^1\text{H NMR}$  (600 MHz,  $\text{CDCl}_3$ )  $\delta$  8.25 (d,  $J = 6.6$  Hz, 1H), 7.89 (d,  $J = 8.4$  Hz, 2H), 7.79 (d,  $J = 9.0$  Hz, 1H), 7.67 (s, 1H), 7.62 (d,  $J = 7.2$  Hz, 1H), 7.43-7.45 (m, 3H), 7.29 (t,  $J = 7.2$  Hz, 1H), 6.81-6.84 (m, 1H), 6.60 (t,  $J = 6.6$  Hz, 1H), 2.47 (s, 3H).  $^{13}\text{C NMR}$  (151 MHz,  $\text{CDCl}_3$ )  $\delta$  138.98, 138.51, 133.55, 132.49, 132.06, 130.66, 129.86, 129.21, 128.84, 127.87, 127.68, 125.12, 122.03, 120.07, 118.83, 113.20, 21.50.

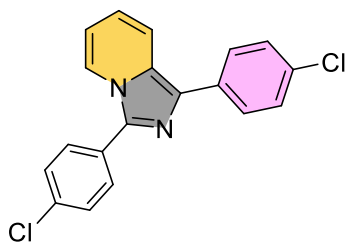

In a 30 mL glass vial, (4-chlorophenyl)(pyridin-2-yl)methanone (0.217 g, 1 mmol), 4-chloro benzyl amine (0.424 g, 3 mmol),  $g\text{-C}_3\text{N}_4$  (50 mg) were added at room temperature (RT). The reaction mixture (RM) was stirred under visible light irradiation (60 W) for 10 h. After the reaction completion, the resulting reaction mass was extracted with EtOAc ( $3 \times 10$  mL) and dried with sodium sulphate. The obtained filtrate was concentrated under reduced pressure. The obtained crude material was further purified by column chromatography (90-10% hexane:ethyl acetate) to afford the desired product (*Yellow solid*). (**Compound 3p**).

**1,3-bis(4-chlorophenyl)imidazo[1,5-a]pyridine (Compound 3p)**. LCMS 197.90% (254 nm) (ES+) calcd for  $\text{C}_{19}\text{H}_{12}\text{Cl}_2\text{N}_2^+$ , 338.03; found, 339.2 (MH<sup>+</sup>).  $^1\text{H NMR}$  (600 MHz,  $\text{CDCl}_3$ )  $\delta$  8.21 (d,  $J = 7.2$  Hz, 1H), 7.87 (d,  $J = 9.0$  Hz, 2H), 7.79-7.82 (m, 3H), 7.53 (d,  $J = 8.4$  Hz, 2H), 7.45 (d,  $J = 8.4$  Hz, 2H), 6.85-6.87 (m, 1H), 6.65 (t,  $J = 7.2$  Hz, 1H).  $^{13}\text{C NMR}$  (151 MHz,  $\text{CDCl}_3$ )  $\delta$  137.12, 134.85, 133.31, 132.31, 131.09, 129.49, 129.35, 128.92, 128.49, 127.97, 127.88, 121.69, 120.30, 119.00, 113.68.

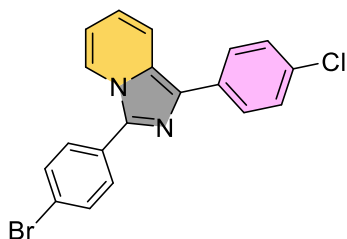

In a 30 mL glass vial, (4-chlorophenyl)(pyridin-2-yl)methanone (0.217 g, 1 mmol), 4-bromo benzyl amine (0.558 g, 3 mmol) and  $g\text{-C}_3\text{N}_4$  (50 mg) were added at room temperature (RT). The reaction mixture (RM) was stirred under visible light irradiation (60 W) for 10 h. After the reaction completion, the resulting reaction mass was extracted with EtOAc ( $3 \times 10$  mL) and dried with sodium sulphate. The obtained filtrate was concentrated under reduced pressure. The obtained crude material was further purified by column chromatography (90-10% hexane:ethyl acetate) to afford the desired product (*Yellow solid*). (**Compound 3q**).

**3-(4-bromophenyl)-1-(4-chlorophenyl)imidazo[1,5-a]pyridine (Compound 3q).**  $^1\text{H NMR}$  (600 MHz,  $\text{CDCl}_3$ )  $\delta$  8.21 (d,  $J = 7.2$  Hz, 1H), 7.87 (d,  $J = 8.4$  Hz, 2H), 7.81 (d,  $J = 9.6$  Hz, 1H), 7.73 (d,  $J = 8.4$  Hz, 2H), 7.69 (d,  $J = 7.8$  Hz, 2H), 7.45 (d,  $J = 7.8$  Hz, 2H), 6.86 (t,  $J = 7.2$  Hz, 1H), 6.64 (t,  $J = 6.6$  Hz, 1H).  $^{13}\text{C NMR}$  (151 MHz,  $\text{CDCl}_3$ )  $\delta$  137.14, 133.29, 132.29, 131.14, 129.69, 128.92, 128.02, 127.88, 123.02, 121.68, 120.33, 119.01, 113.73.

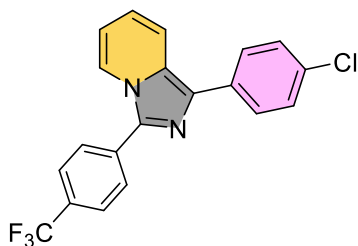

In a 30 mL glass vial, (4-chlorophenyl)(pyridin-2-yl)methanone (0.217 g, 1 mmol), 4-trifluoromethyl benzylamine (0.525 g, 3 mmol) and  $g\text{-C}_3\text{N}_4$  (50 mg) were added at room temperature (RT). The reaction mixture (RM) was stirred under visible light irradiation (60 W) for 10 h. After the reaction completion, the resulting reaction mass was extracted with EtOAc ( $3 \times 10$  mL) and dried with sodium sulphate. The obtained filtrate was concentrated under reduced pressure. The obtained crude material was further purified by column chromatography (90-10% hexane:ethyl acetate) to afford the desired product (*Yellow solid*). (**Compound 3r**).

**1-(4-chlorophenyl)-3-(4-(trifluoromethyl)phenyl)imidazo[1,5-a]pyridine (Compound 3r).**  $^1\text{H NMR}$  (600 MHz,  $\text{CDCl}_3$ )  $\delta$  8.28 (d,  $J = 7.2$  Hz, 1H), 8.00 (d,  $J = 7.8$  Hz, 2H), 7.88 (d,  $J = 8.4$  Hz, 2H), 7.81-7.85 (m, 3H), 7.46 (d,  $J = 7.8$  Hz, 2H), 6.89 (t,  $J = 6.6$  Hz, 1H), 6.69 (t,  $J = 6.6$  Hz, 1H).  $^{13}\text{C NMR}$  (151 MHz,  $\text{CDCl}_3$ )  $\delta$  136.65, 133.51, 133.16, 132.47, 131.57, 130.55 (q,  $J = 33.2$  Hz), 128.95, 128.36, 128.28, 127.92, 126.05 (q,  $J = 3.9$  Hz), 123.97 (d,  $J = 272.1$  Hz), 121.62, 120.64, 119.08, 114.03.



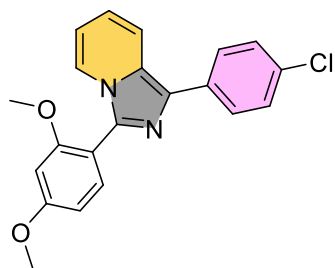

In a 30 mL glass vial, (4-chlorophenyl)(pyridin-2-yl)methanone (0.217 g, 1 mmol), 2,4-dimethoxy benzylamine (0.501 g, 3 mmol) and  $g\text{-C}_3\text{N}_4$  (50 mg) were added at room temperature (RT). The reaction mixture (RM) was stirred under visible light irradiation (60 W) for 10 h. After the reaction completion, the resulting reaction mass was extracted with EtOAc ( $3 \times 10$  mL) and dried with sodium sulphate. The obtained filtrate was concentrated under reduced pressure. The obtained crude material was further purified by column chromatography (90-10% hexane:ethyl acetate) to afford the desired product (*Yellow solid*) (**Compound 3s**).

**1-(4-chlorophenyl)-3-(2,4-dimethoxyphenyl)imidazo[1,5-a]pyridine (Compound 3s).**  $^1\text{H}$  NMR (600 MHz,  $\text{CDCl}_3$ )  $\delta$  7.90 (d,  $J = 5.4$  Hz, 2H), 7.80 (d,  $J = 7.8$  Hz, 1H), 7.59 (s, 2H), 7.43 (s, 2H), 6.83 (s, 1H), 6.68 (d,  $J = 5.4$  Hz, 1H), 6.62 (s, 1H), 6.55 (s, 1H), 3.90 (s, 3H), 3.81 (s, 3H).  $^{13}\text{C}$  NMR (151 MHz,  $\text{CDCl}_3$ )  $\delta$  162.28, 158.65, 136.42, 133.87, 133.48, 131.68, 129.97, 128.75, 127.75, 127.35, 123.58, 119.83, 118.30, 111.97, 105.36, 98.82, 55.58.

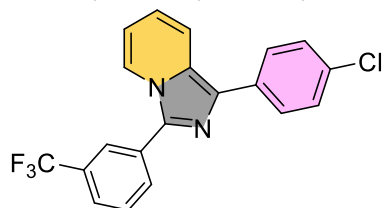

In a 30 mL glass vial, (4-chlorophenyl)(pyridin-2-yl)methanone (0.217 g, 1 mmol), 3-trifluoromethyl benzyl amine (0.525 g, 3 mmol) and  $g\text{-C}_3\text{N}_4$  (50 mg) were added at room temperature (RT). The reaction mixture (RM) was stirred under visible light irradiation (60 W) for 10 h. After the reaction completion, the resulting reaction mass was extracted with EtOAc ( $3 \times 10$  mL) and dried with sodium sulphate. The obtained filtrate was concentrated under reduced pressure. The obtained crude material was further purified by column chromatography (90-10% hexane:ethyl acetate) to afford the desired product (*Yellow solid*) (**Compound 3t**).

**1-(4-chlorophenyl)-3-(3-(trifluoromethyl)phenyl)imidazo[1,5-a]pyridine (Compound 3t).**  $^1\text{H}$  NMR (600 MHz,  $\text{CDCl}_3$ )  $\delta$  8.24 (d,  $J = 7.2$  Hz, 1H), 8.14 (s, 1H), 8.05 (d,  $J = 7.2$  Hz, 1H), 7.89 (d,  $J = 8.4$  Hz, 2H), 7.84 (d,  $J = 9$  Hz, 1H), 7.73 (d,  $J = 7.8$  Hz, 1H), 7.69 (t,  $J = 7.2$  Hz, 1H), 7.46 (d,  $J = 8.4$  Hz, 2H), 6.88-6.90 (m, 1H), 6.69 (t,  $J = 7.2$  Hz, 1H).  $^{13}\text{C}$  NMR (151 MHz,  $\text{CDCl}_3$ )  $\delta$  136.63, 133.19, 132.44, 131.54 (t,  $J = 32.6$  Hz), 131.24, 130.90, 129.63, 128.95, 128.20, 127.91, 126.60, 125.46 (q,  $J = 3.9$  Hz), 125.07 (q,  $J = 3.7$  Hz), 123.89 (d,  $J = 272.7$  Hz), 121.47, 121.18, 120.55, 119.07, 114.02.

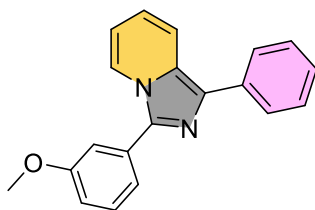

In a 30 mL glass vial, *phenyl(pyridin-2-yl)methanone* (0.183 g, 1 mmol), *3-methoxybenzylamine* (0.411 g, 3 mmol) and *g-C<sub>3</sub>N<sub>4</sub>* (50 mg) were added at room temperature (RT). The reaction mixture (RM) was stirred under visible light irradiation (60 W) for 10 h. After the reaction completion, the resulting reaction mass was extracted with EtOAc (3×10 mL) and dried with sodium sulphate. The obtained filtrate was concentrated under reduced pressure. The obtained crude material was further purified by column chromatography (90-10% hexane:ethyl acetate) to afford the desired product (*Yellow solid*). (**Compound 3u**).

**3-(2-methoxyphenyl)-1-phenylimidazo[1,5-a]pyridine (Compound 3u)**<sup>7</sup>. LCMS 96.47% (254 nm) (ES<sup>+</sup>) calcd for C<sub>20</sub>H<sub>16</sub>N<sub>2</sub>O<sup>+</sup>, 300.12; found, 301.2 (MH<sup>+</sup>). <sup>1</sup>H NMR (400 MHz, DMSO-*d*<sub>6</sub>) δ 8.49 (*d*, *J* = 7.2 Hz, 1H), 8.01 (*d*, *J* = 9.6 Hz, 1H), 7.95 (*d*, *J* = 7.6 Hz, 2H), 7.51-7.44 (*m*, 4H), 7.39 (*s*, 1H), 7.30 (*t*, *J* = 7.6 Hz, 1H), 7.09 (*d*, *J* = 7.2 Hz, 1H), 6.98 (*t*, *J* = 6.0 Hz, 1H), 6.79 (*d*, *J* = 6.8 Hz, 1H), 3.86 (*s*, 3H). <sup>13</sup>C NMR (100 MHz, CDCl<sub>3</sub>) δ 160.14, 137.96, 134.88, 131.93, 131.33, 130.04, 128.76, 127.76, 126.87, 126.62, 121.97, 120.42, 119.81, 119.18, 114.98, 113.78, 113.32, 55.51.

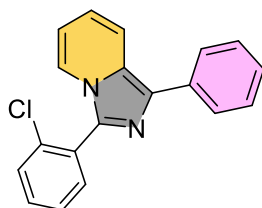

In a 30 mL glass vial, *phenyl(pyridin-2-yl)methanone* (0.183 g, 1 mmol), *2-chlorobenzylamine* (0.424 g, 3 mmol) and *g-C<sub>3</sub>N<sub>4</sub>* (50 mg) were added at room temperature (RT). The reaction mixture (RM) was stirred under visible light irradiation (60 W) for 10 h. After the reaction completion, the resulting reaction mass was extracted with EtOAc (3×10 mL) and dried with sodium sulphate. The obtained filtrate was concentrated under reduced pressure. The obtained crude material was further purified by column chromatography (90-10% hexane:ethyl acetate) to afford the desired product (*Yellow solid*). (**Compound 3v**).

**3-(2-chlorophenyl)-1-phenylimidazo[1,5-a]pyridine (Compound 3v)**<sup>7</sup>. <sup>1</sup>H NMR (600 MHz, CDCl<sub>3</sub>) δ 7.98 (*d*, *J* = 5.2 Hz, 2H), 7.91 (*d*, *J* = 9 Hz, 1H), 7.70 (*d*, *J* = 6.6 Hz, 1H), 7.62 (*d*, *J* = 7.2 Hz, 1H), 7.58 (*d*, *J* = 7.2 Hz, 1H), 7.44-7.50 (*m*, 4H), 7.32 (*t*, *J* = 7.2 Hz, 1H), 6.87 (*t*, *J* = 7.2 Hz, 1H), 6.63 (*t*, *J* = 6.6 Hz, 1H). <sup>13</sup>C NMR (151 MHz, CDCl<sub>3</sub>) δ 135.71, 134.92, 134.40, 133.40, 132.93, 131.65, 130.98, 130.86, 129.96, 129.35, 128.72, 128.17, 127.29, 127.27, 126.76, 126.53, 124.63, 122.62, 119.94, 118.89, 112.86.

**Copies of LC-MS, <sup>1</sup>H NMR and <sup>13</sup>C NMR**

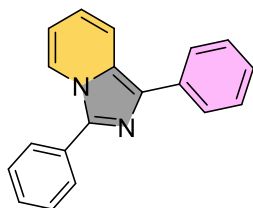

Compound (3a)

**LC-MS of Compound 3a**

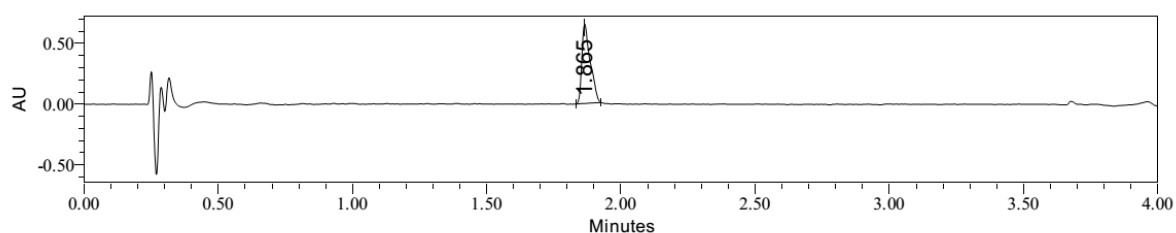

Channel Name 210.0nm; Channel PDA Spectrum

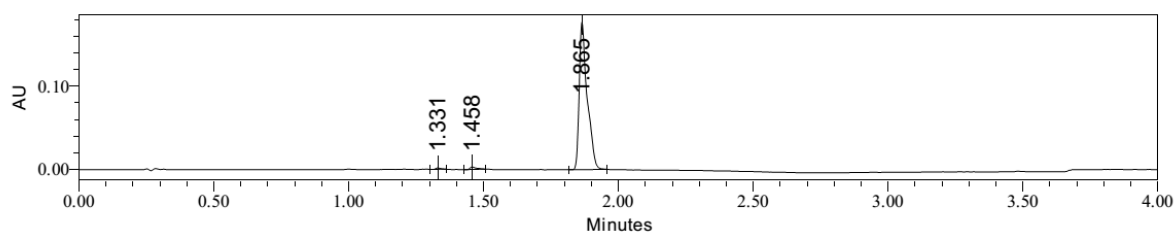

Channel Name 254.0nm; Channel PDA Spectrum

**Peak Results  
Channel: PDA Spectrum**

|   | RT    | Base Peak (m/z) | Height | Area    | % Area | Channel      | Channel Name |
|---|-------|-----------------|--------|---------|--------|--------------|--------------|
| 1 | 1.331 |                 | 1624   | 2266    | 0.61   | PDA Spectrum | 254.0nm      |
| 2 | 1.458 |                 | 3019   | 5248    | 1.41   | PDA Spectrum | 254.0nm      |
| 3 | 1.865 |                 | 653321 | 1419185 | 100.00 | PDA Spectrum | 210.0nm      |
| 4 | 1.865 |                 | 176653 | 363634  | 97.98  | PDA Spectrum | 254.0nm      |

**Match Plot**

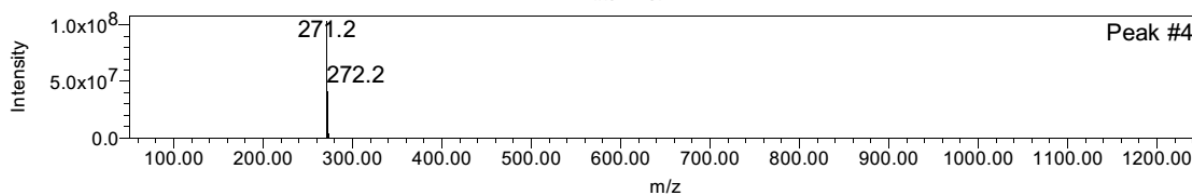

Base Peak 271.19 Channel Description 1: QDa Positive(+) Scan (60.00-1250.00)Da, Centroid, CV=10 - AVG (1.6:1.7;2.2:3.8;0.2:1.2) x 20.000 Th: 0.010 Retention Time 1.889

<sup>1</sup>H NMR of Compound 3a

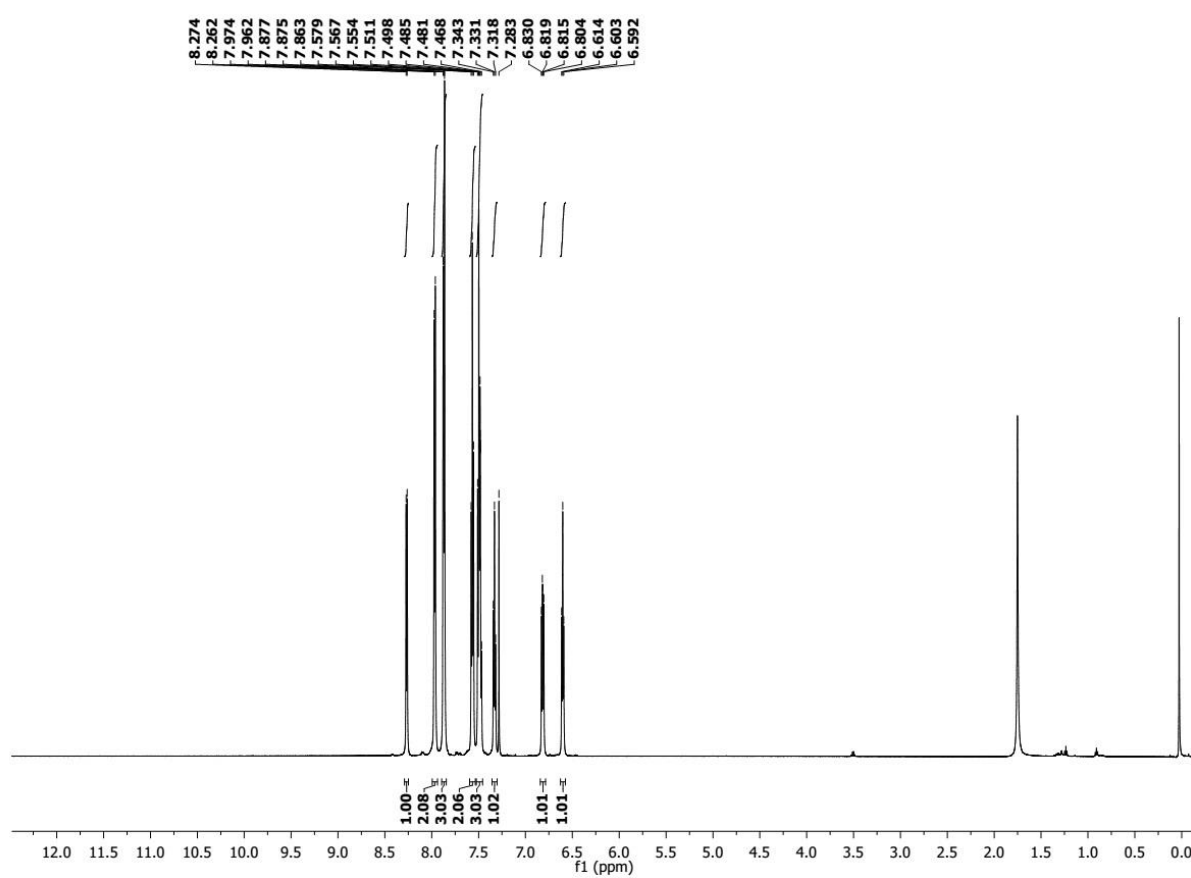

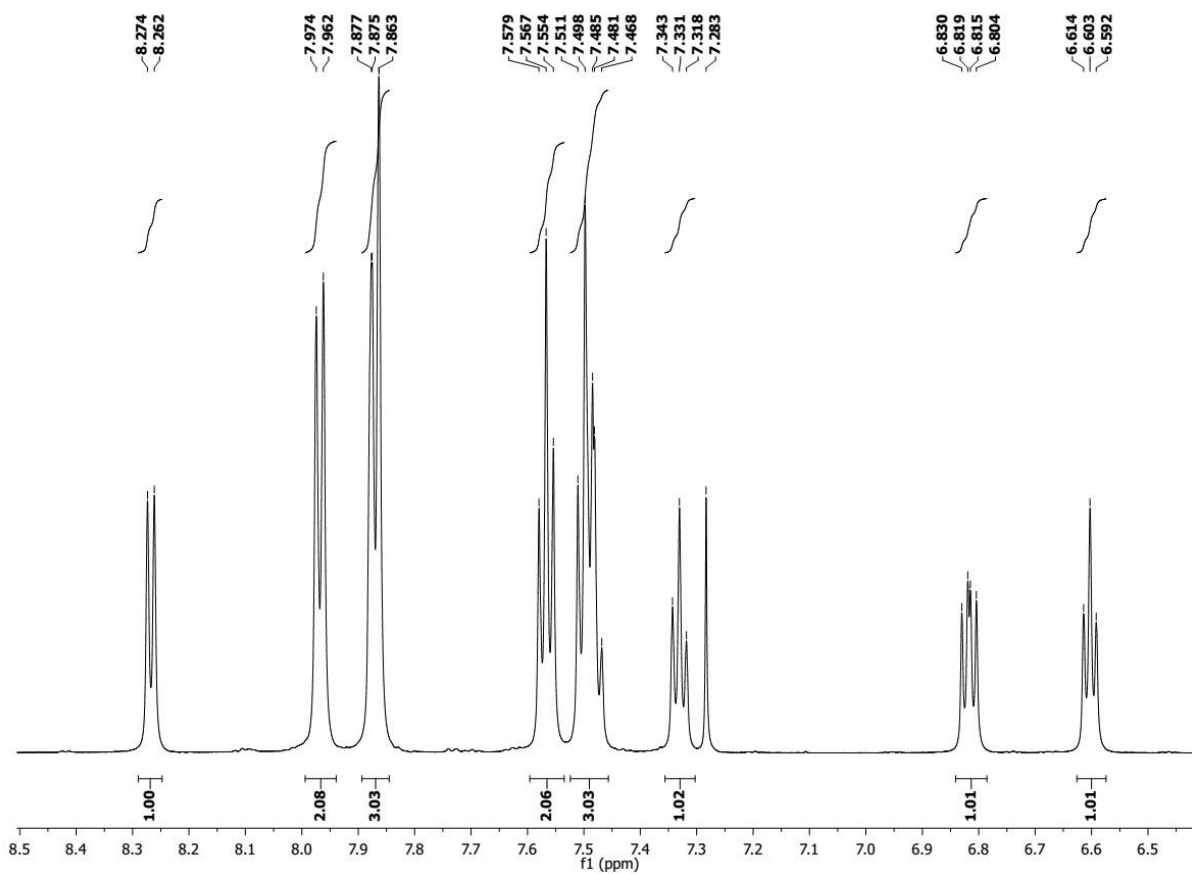

$^{13}\text{C}$  NMR of Compound 3a

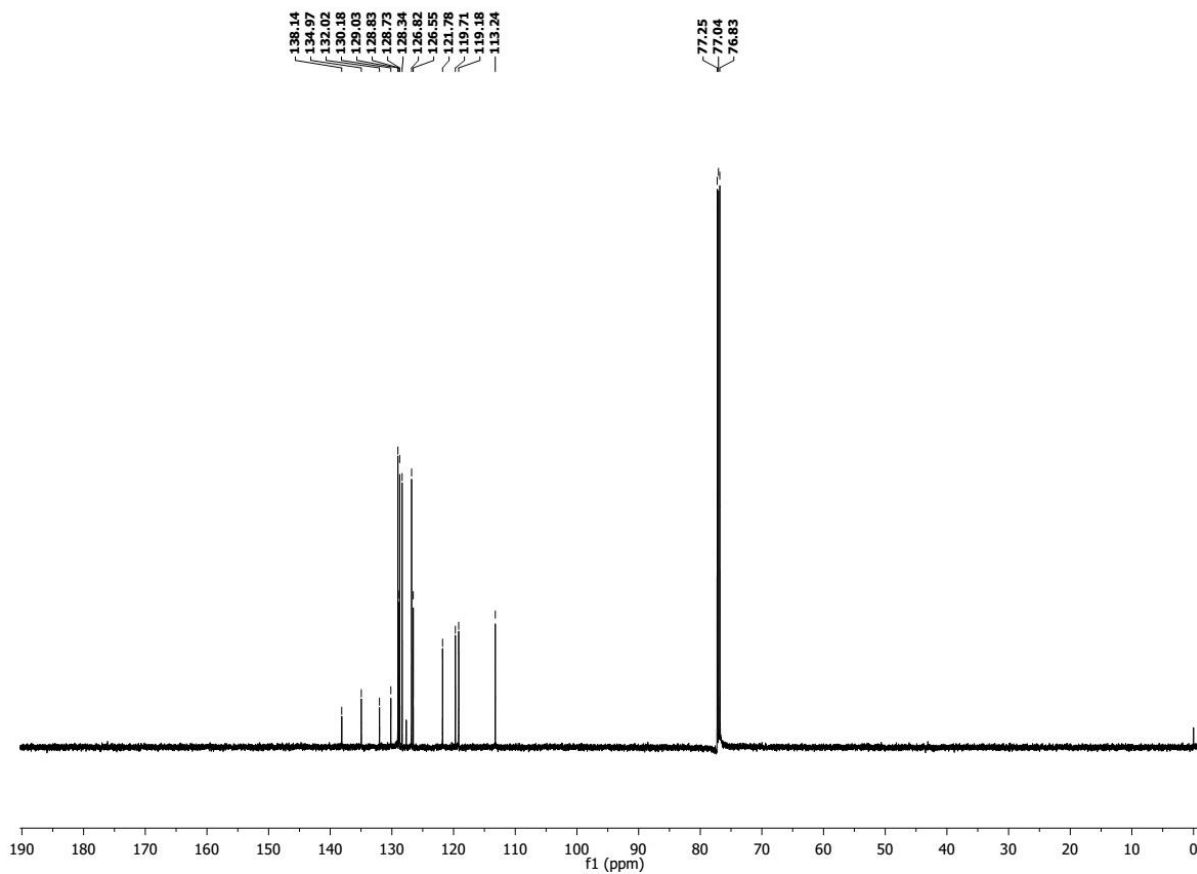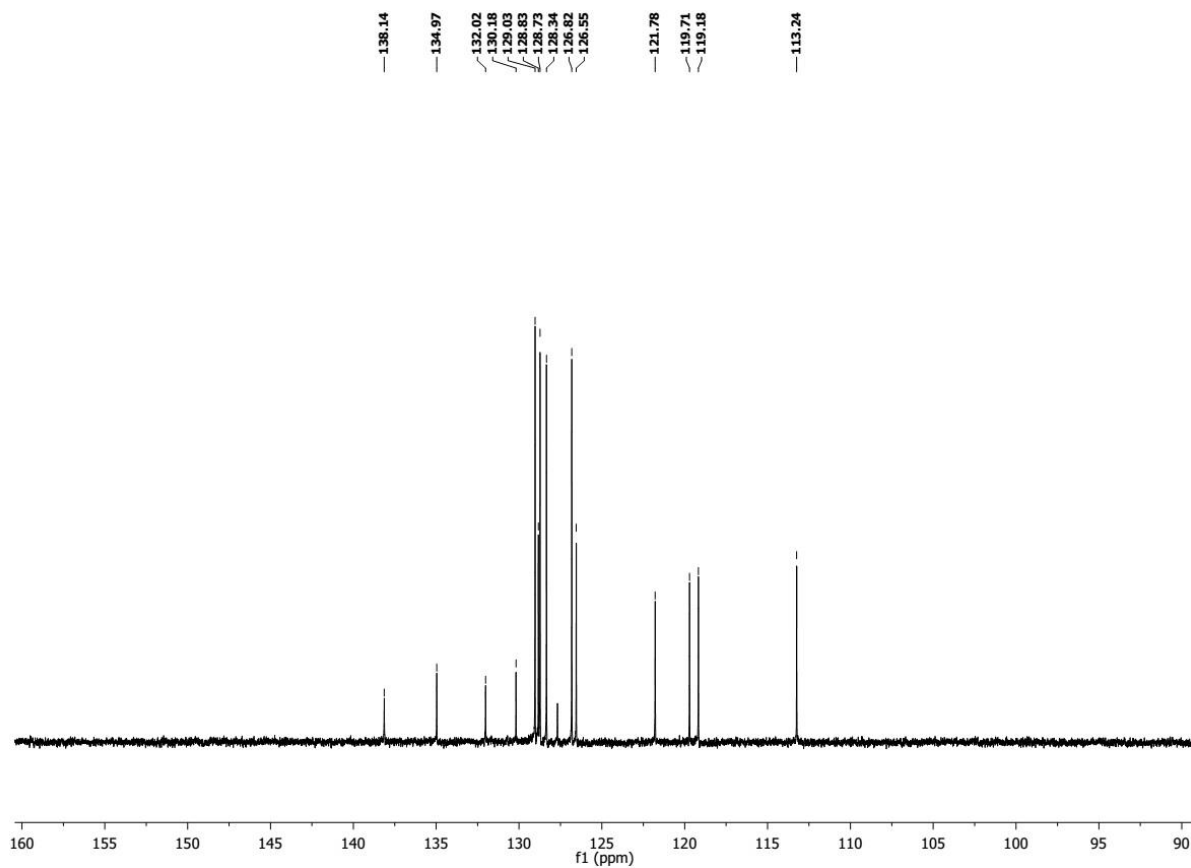

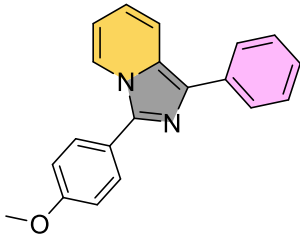

Compound (3b)

LC-MS analysis of Compound 3b

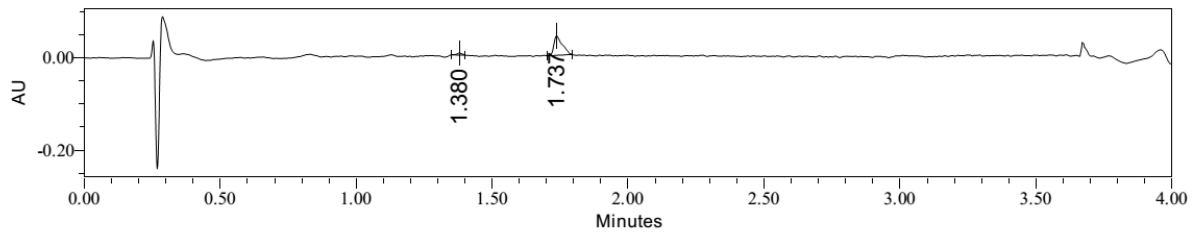

**Peak Results**  
Channel: PDA Spectrum

|   | RT    | Base Peak (m/z) | Height | Area  | % Area | Channel      | Channel Name |
|---|-------|-----------------|--------|-------|--------|--------------|--------------|
| 1 | 1.380 |                 | 4384   | 6113  | 6.34   | PDA Spectrum | 220.0nm      |
| 2 | 1.737 |                 | 42212  | 90240 | 93.66  | PDA Spectrum | 220.0nm      |

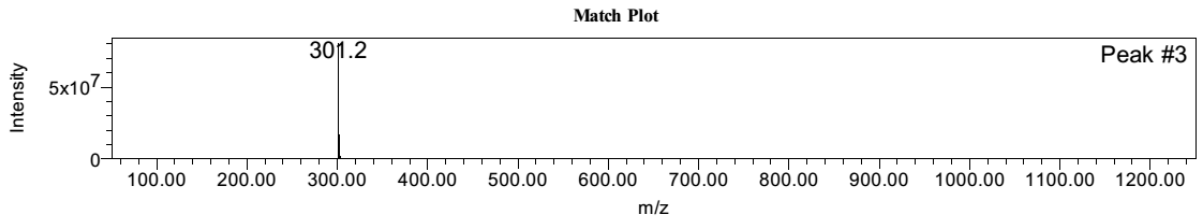

Base Peak 301.18 Channel Description 1: QDa Positive(+) Scan (60.00-1250.00)Da, Centroid, CV=10 - AVG (0.1:1.5;1.9:3.8) x 20.000 Th: 0.010 Retention Time 1.766

<sup>1</sup>H NMR of Compound 3b

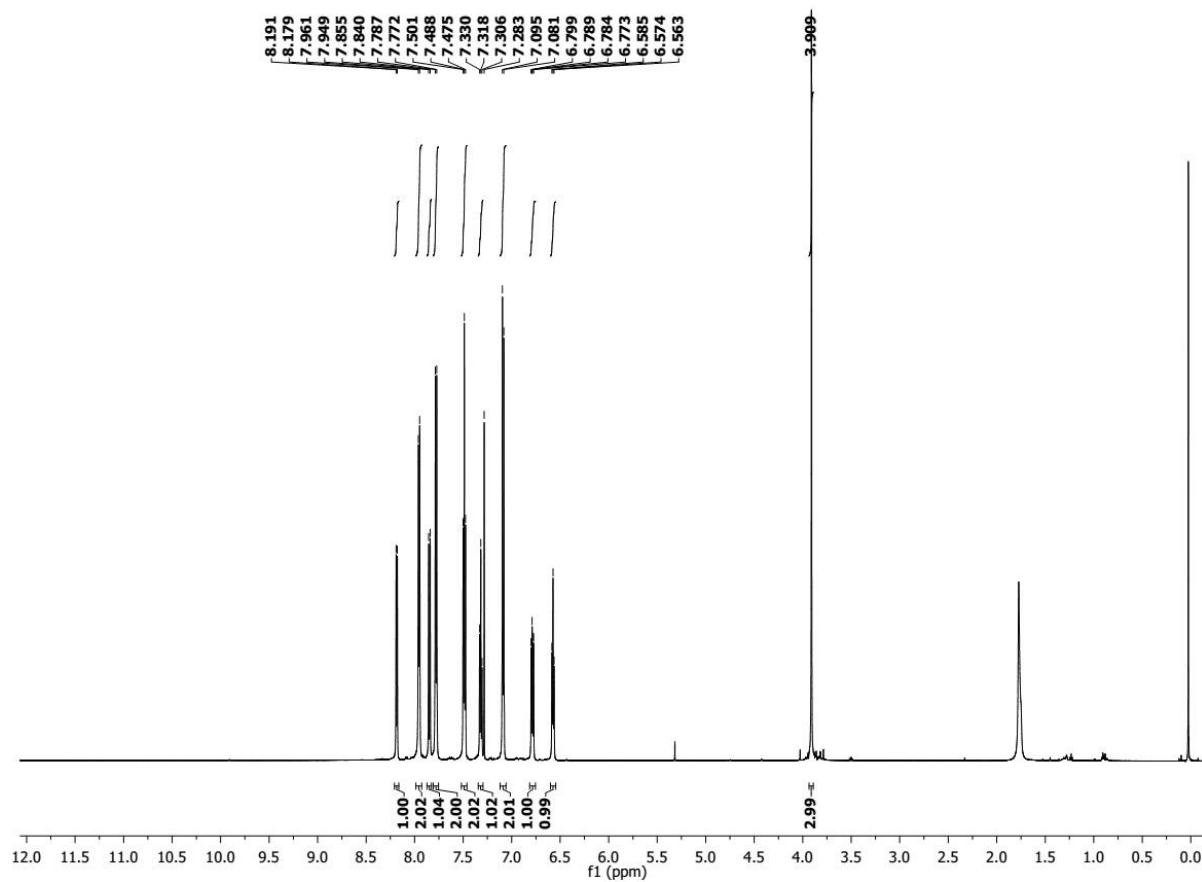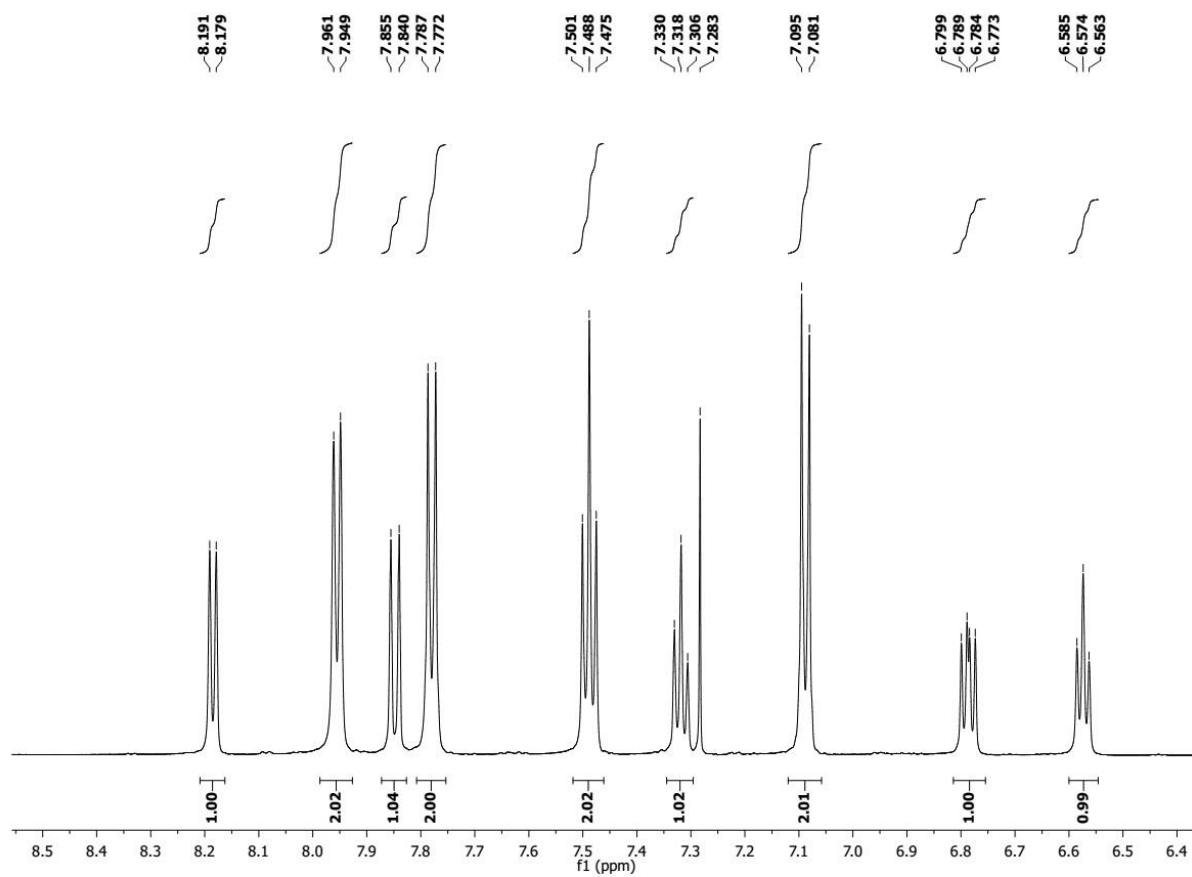



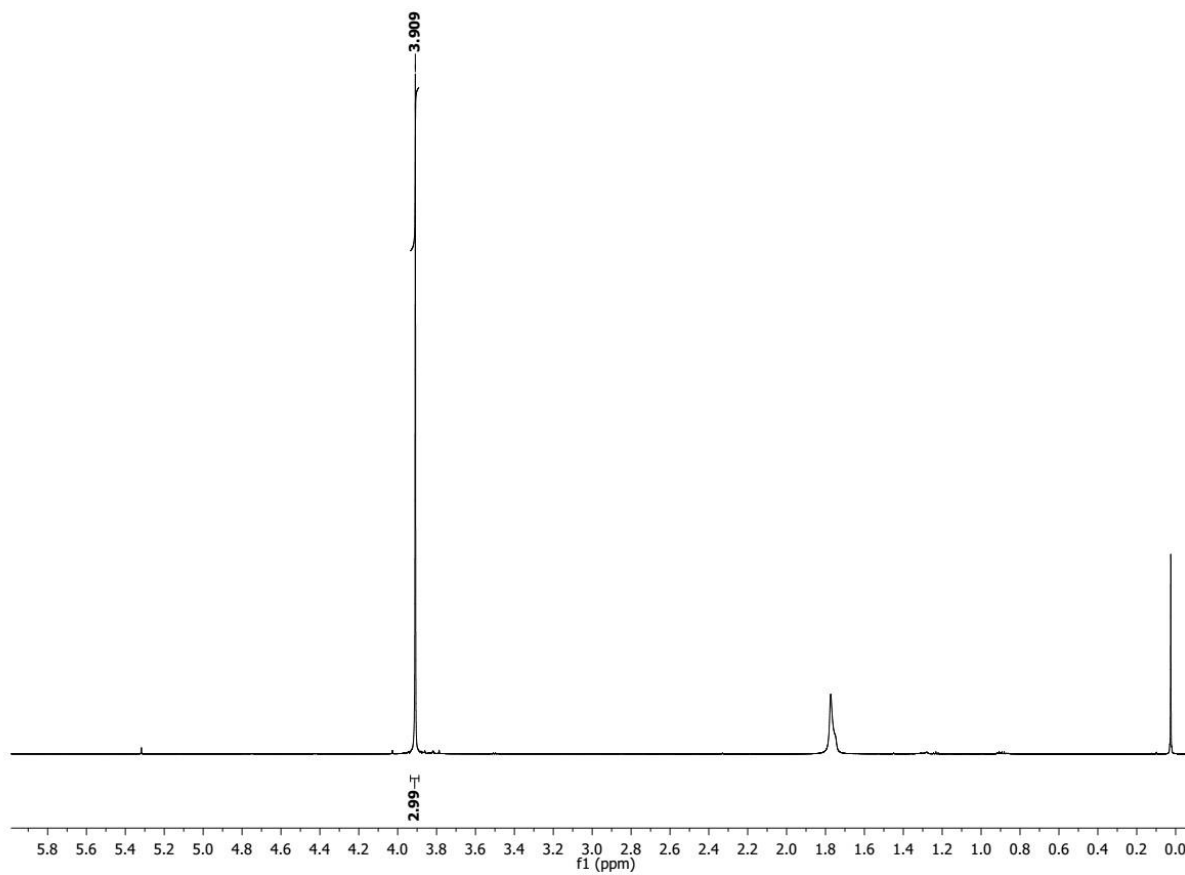

<sup>13</sup>C NMR of Compound 3b

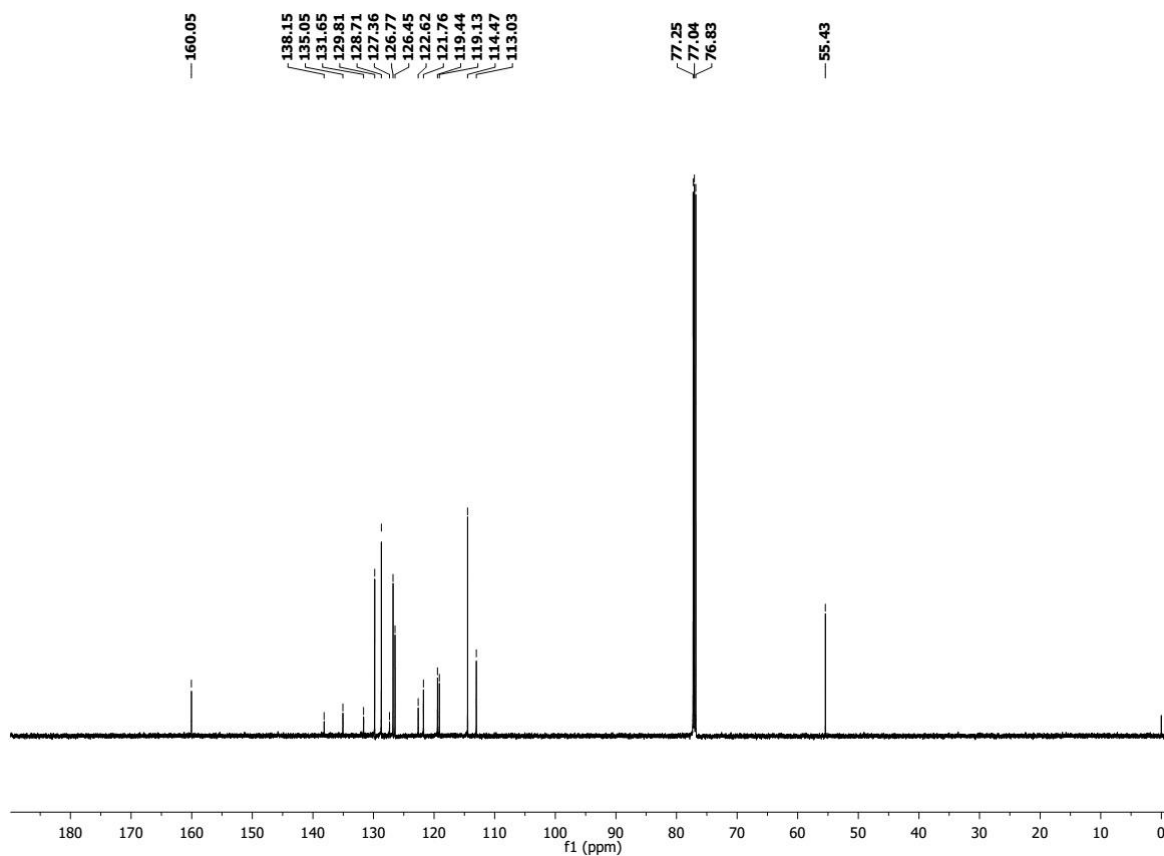

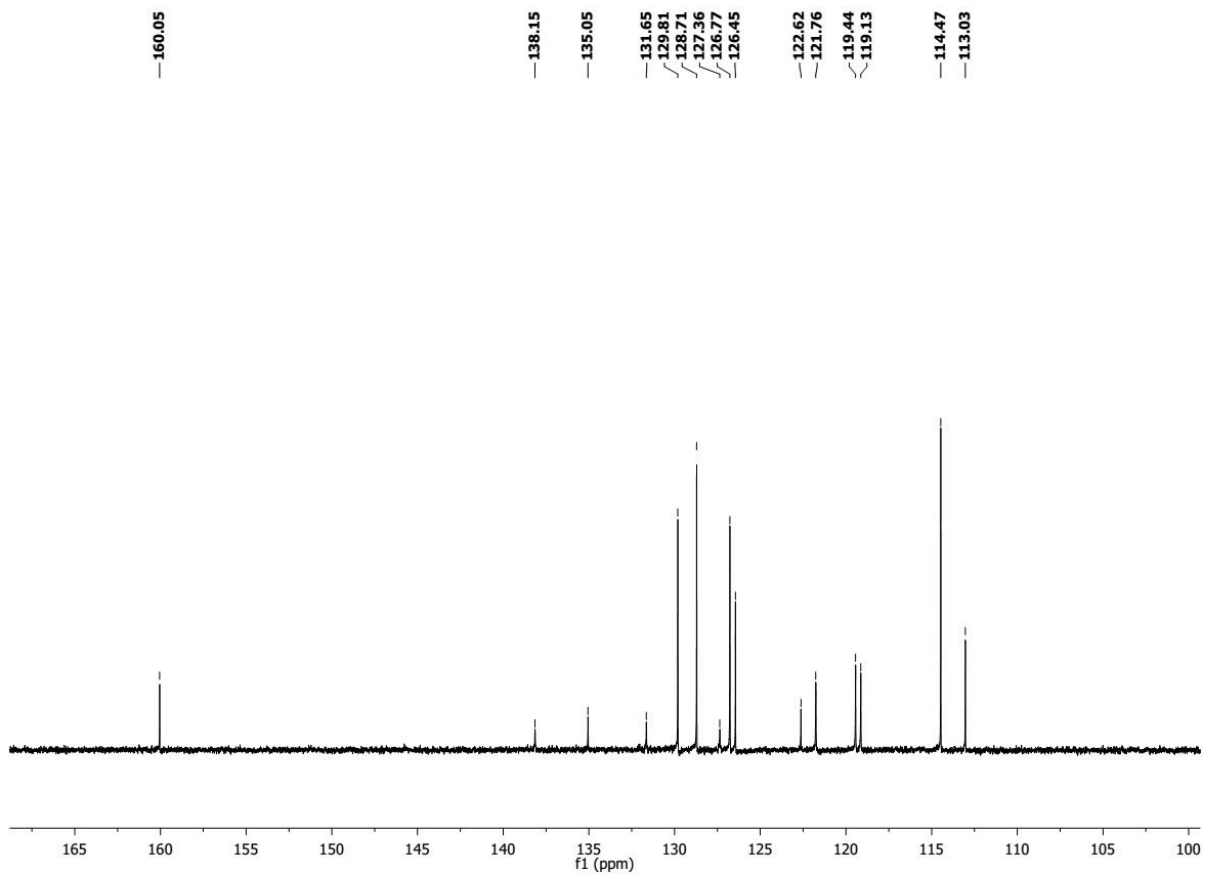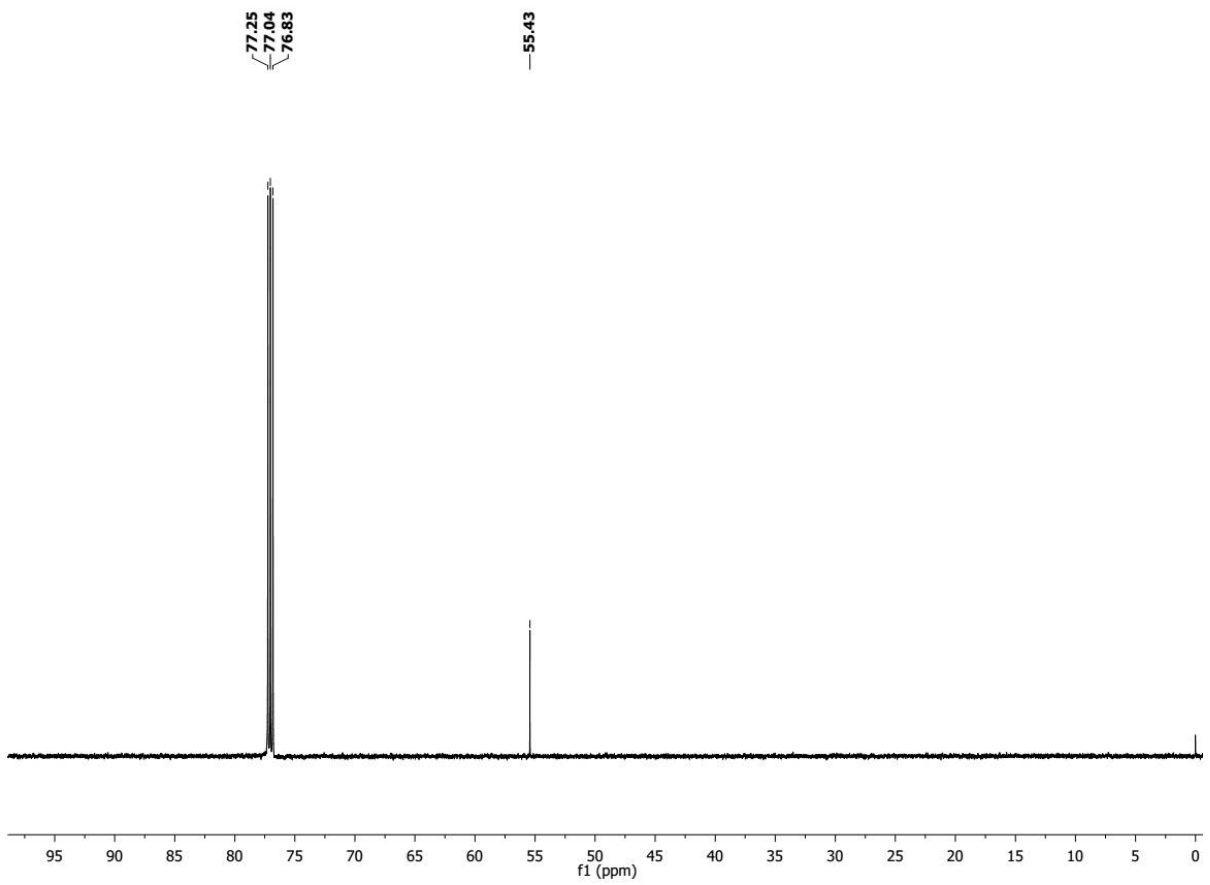

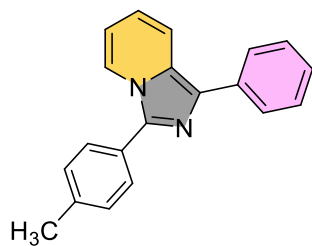

Compound (3c)

LC-MS analysis of Compound 3c

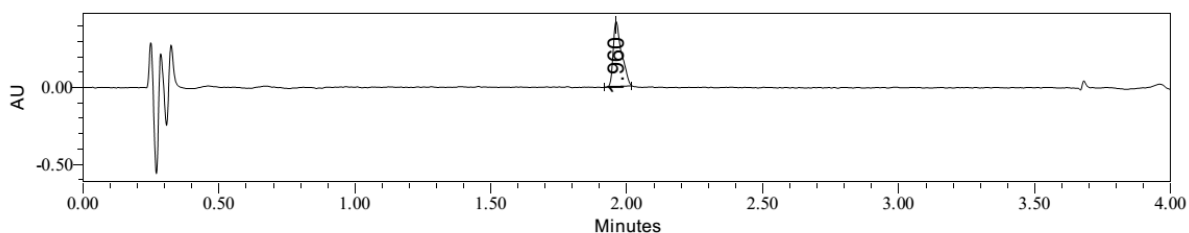

Channel Name 210.0nm; Channel PDA Spectrum

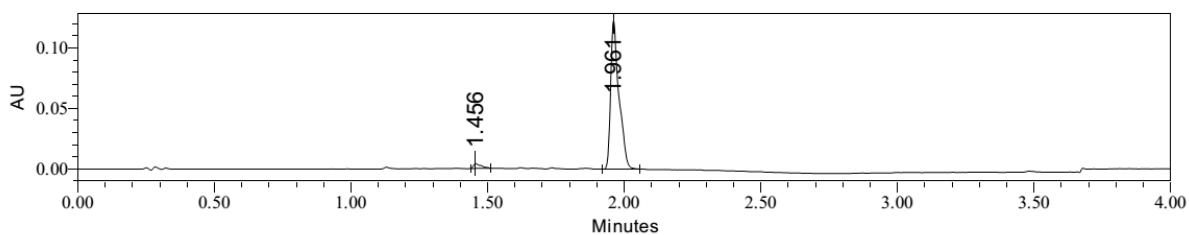

Channel Name 254.0nm; Channel PDA Spectrum

**Peak Results**  
**Channel: PDA Spectrum**

|   | RT    | Base Peak (m/z) | Height | Area   | % Area | Channel      | Channel Name |
|---|-------|-----------------|--------|--------|--------|--------------|--------------|
| 1 | 1.456 |                 | 3931   | 7630   | 2.86   | PDA Spectrum | 254.0nm      |
| 2 | 1.960 |                 | 424520 | 902743 | 100.00 | PDA Spectrum | 210.0nm      |
| 3 | 1.961 |                 | 122448 | 259546 | 97.14  | PDA Spectrum | 254.0nm      |

**Match Plot**

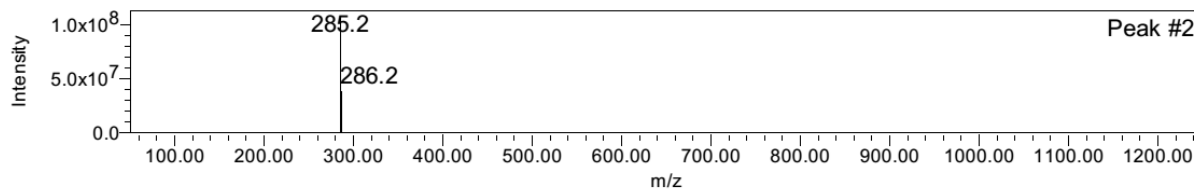

Base Peak 285.21 Channel Description 1: QDa Positive(+) Scan (60.00-1250.00)Da, Centroid, CV=10 - AVG (1.6:1.8;0.5:1.3;2.2:3.8) x 20.000 Th: 0.010 Retention Time 1.990

<sup>1</sup>H NMR of Compound 3c

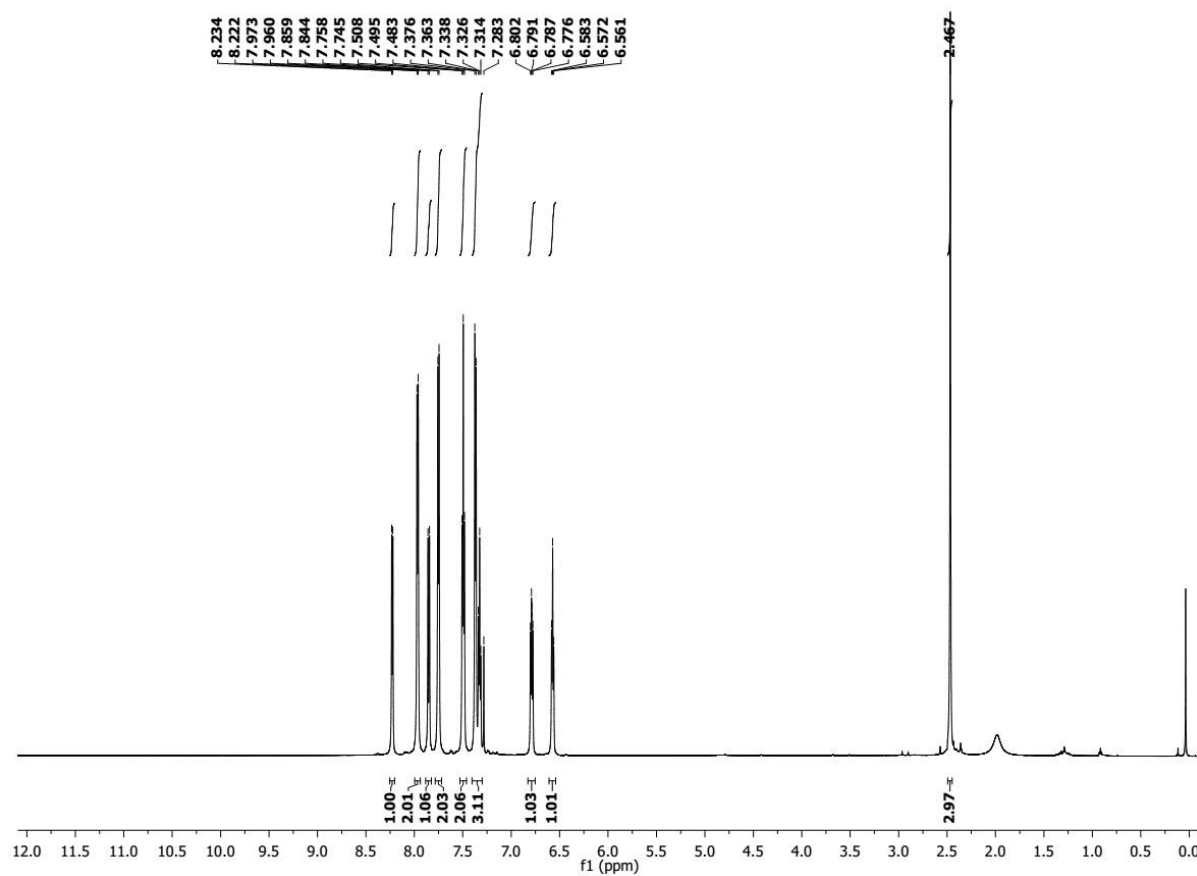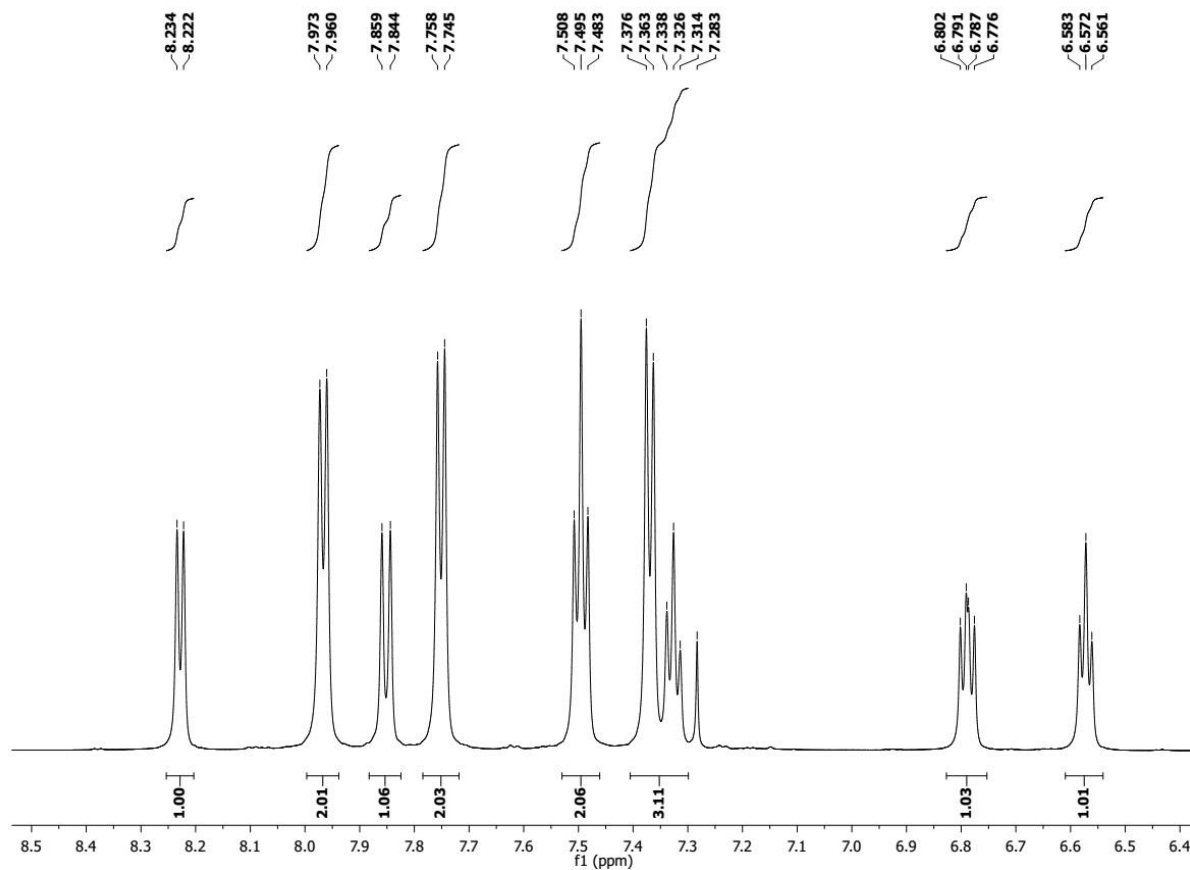

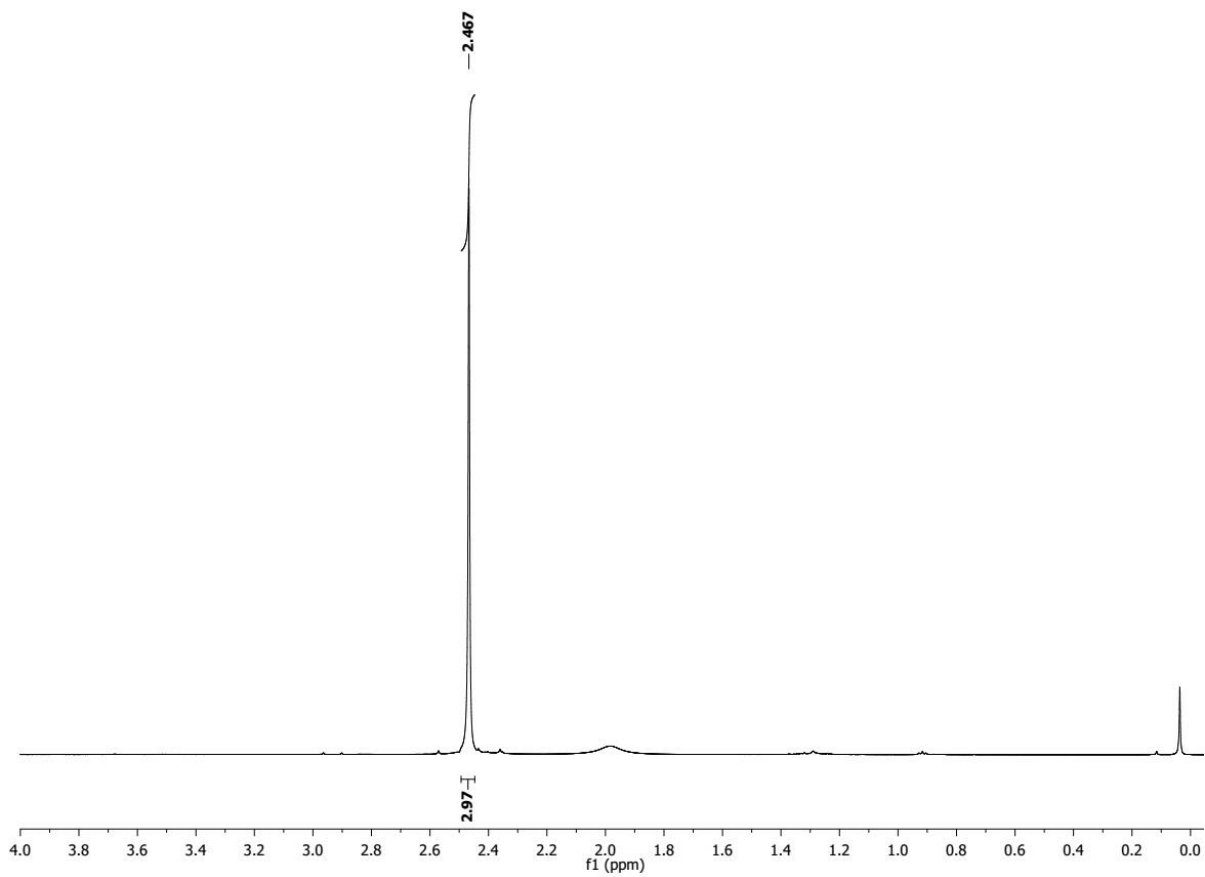

$^{13}\text{C}$  NMR of Compound 3c

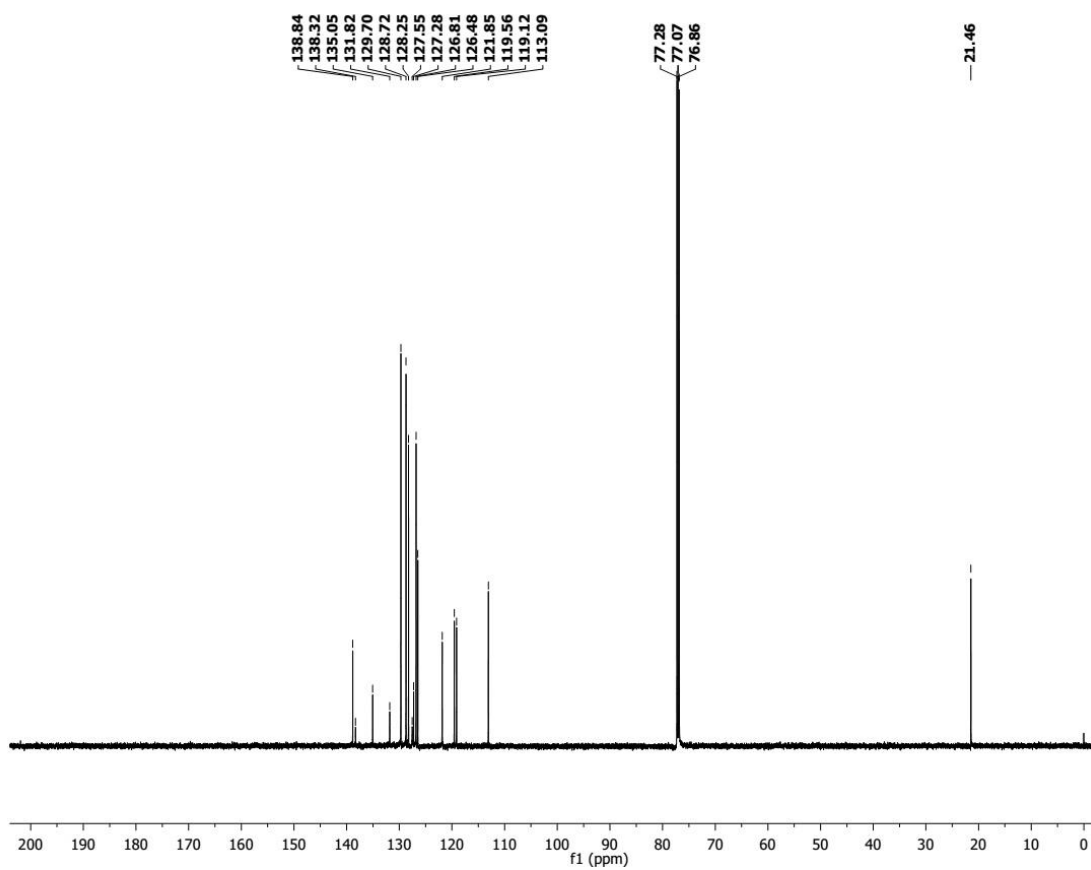

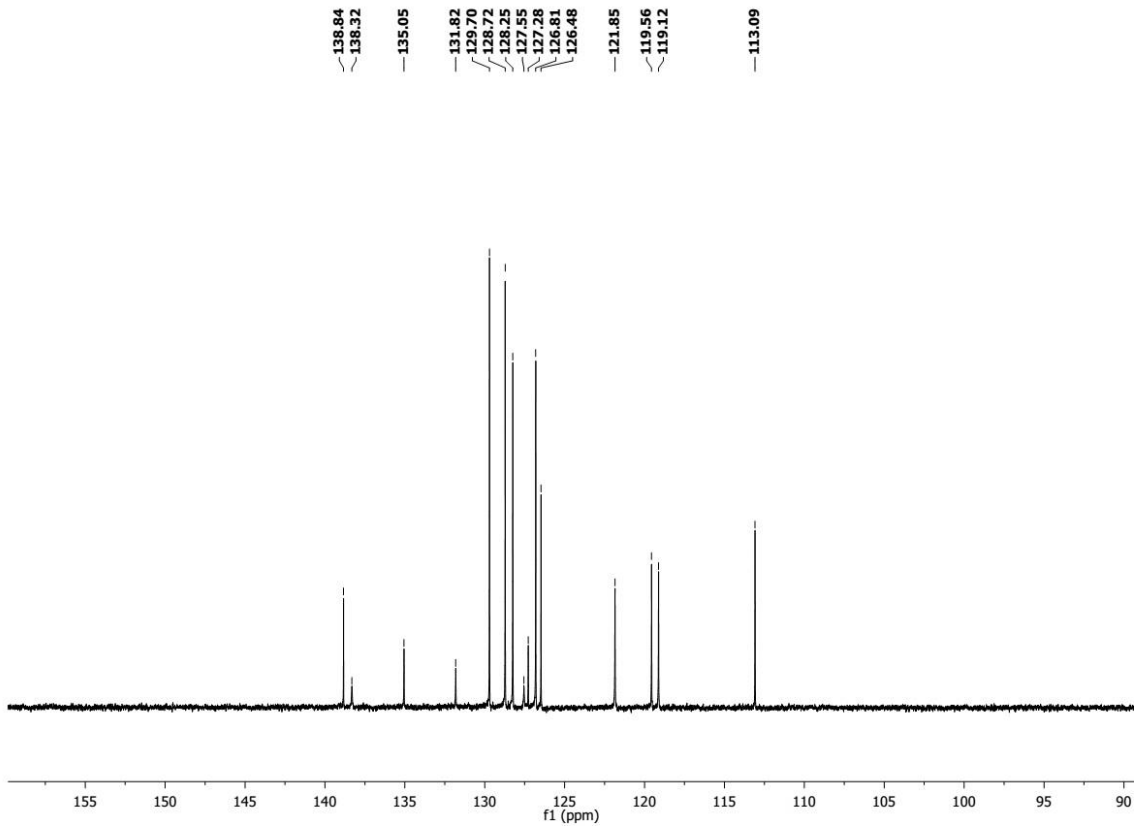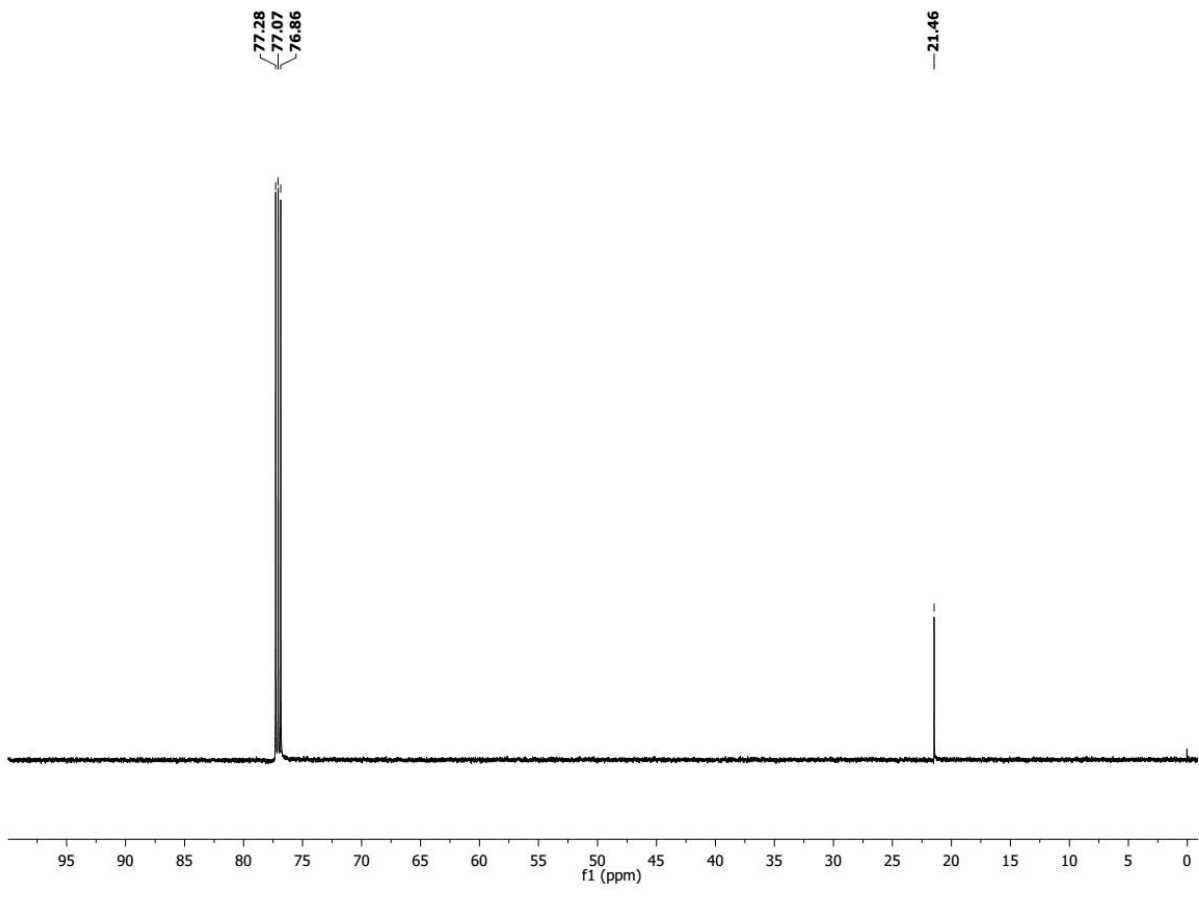

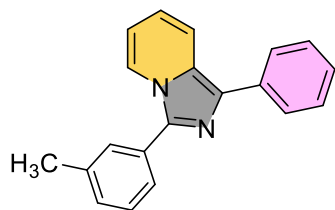

Compound (3d)

LC-MS analysis of Compound 3d

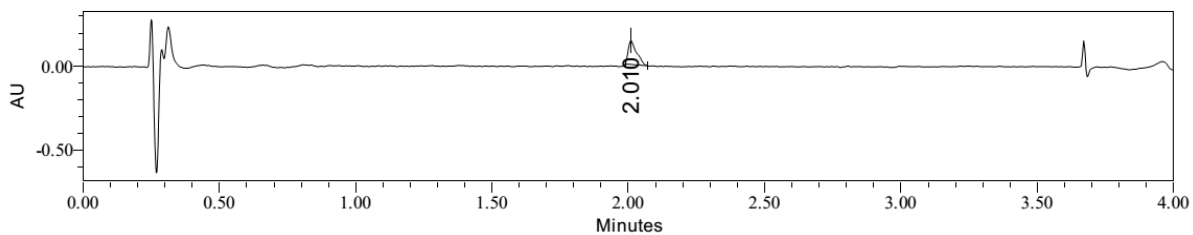

Channel Name 210.0nm; Channel PDA Spectrum

**Peak Results**  
Channel: PDA Spectrum

|   | RT    | Base Peak (m/z) | Height | Area   | % Area | Channel      | Channel Name |
|---|-------|-----------------|--------|--------|--------|--------------|--------------|
| 1 | 2.010 |                 | 141643 | 302143 | 100.00 | PDA Spectrum | 210.0nm      |

**Match Plot**

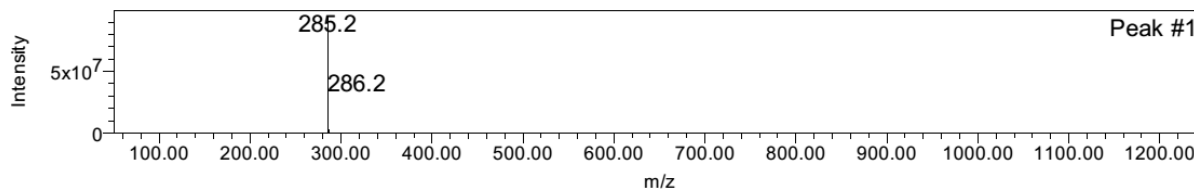

Base Peak 285.18 Channel Description 1: QDa Positive(+) Scan (60.00-1250.00)Da, Centroid, CV=10 - AVG (0.0:1.9;2.2:3.8) x 20.000 Th: 0.010 Retention Time 2.039

# <sup>1</sup>H NMR of Compound 3d

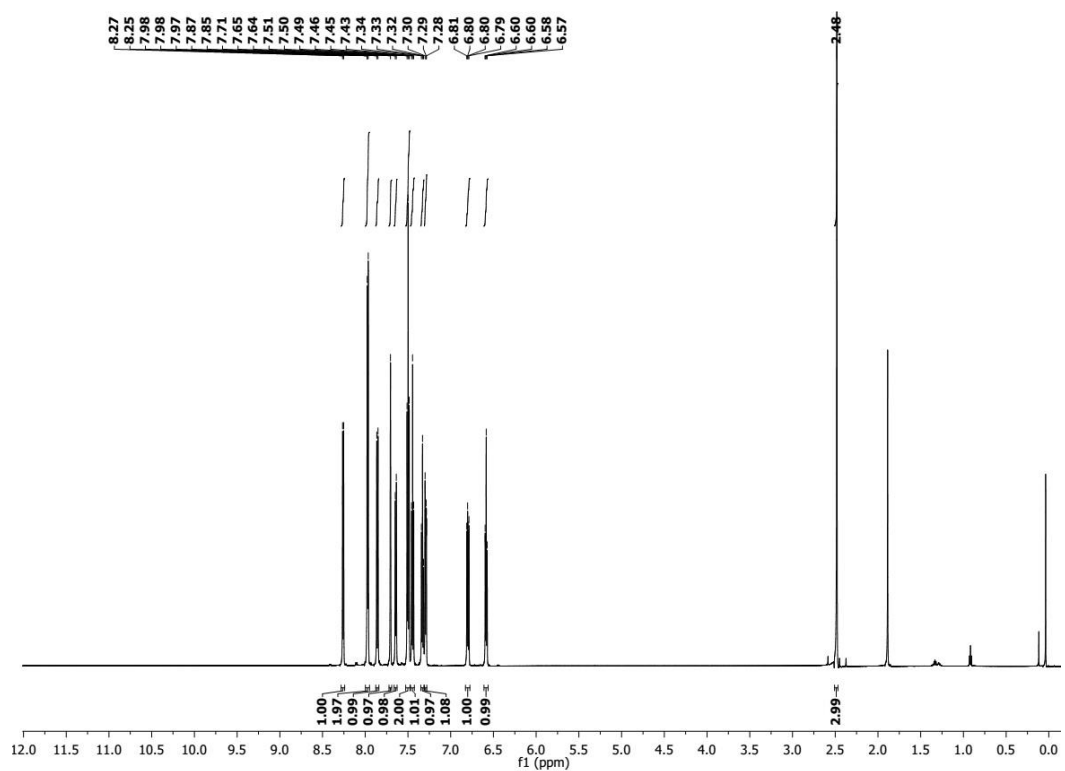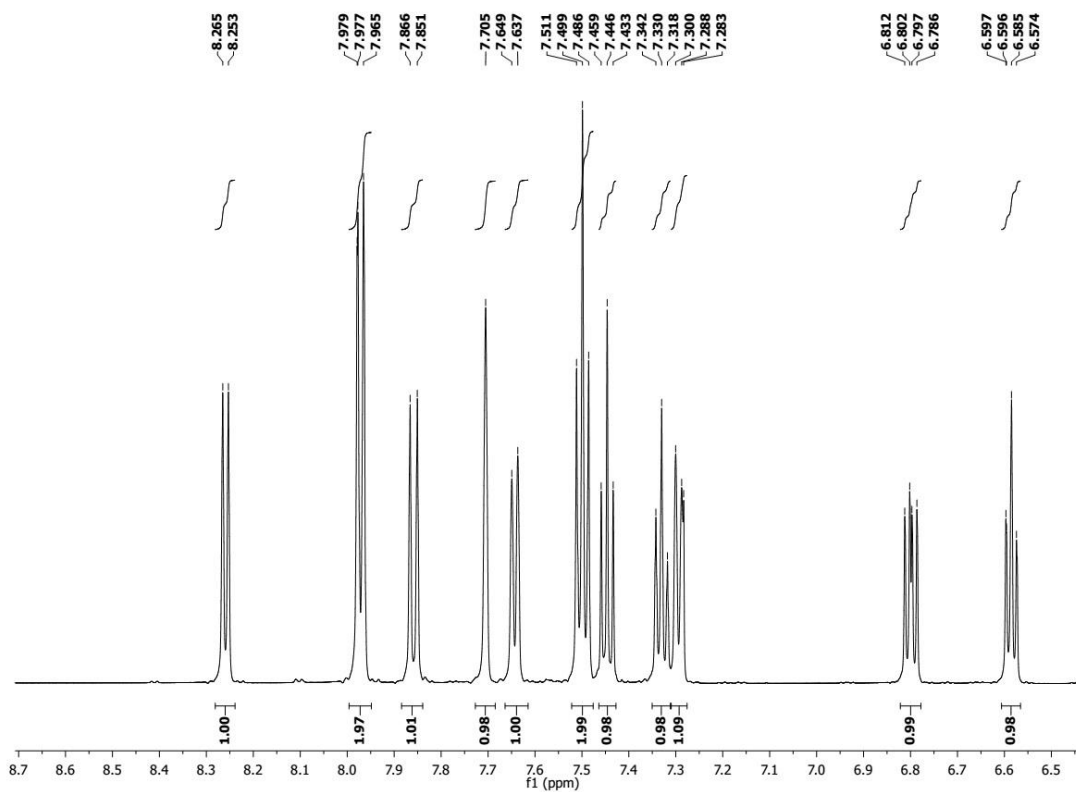



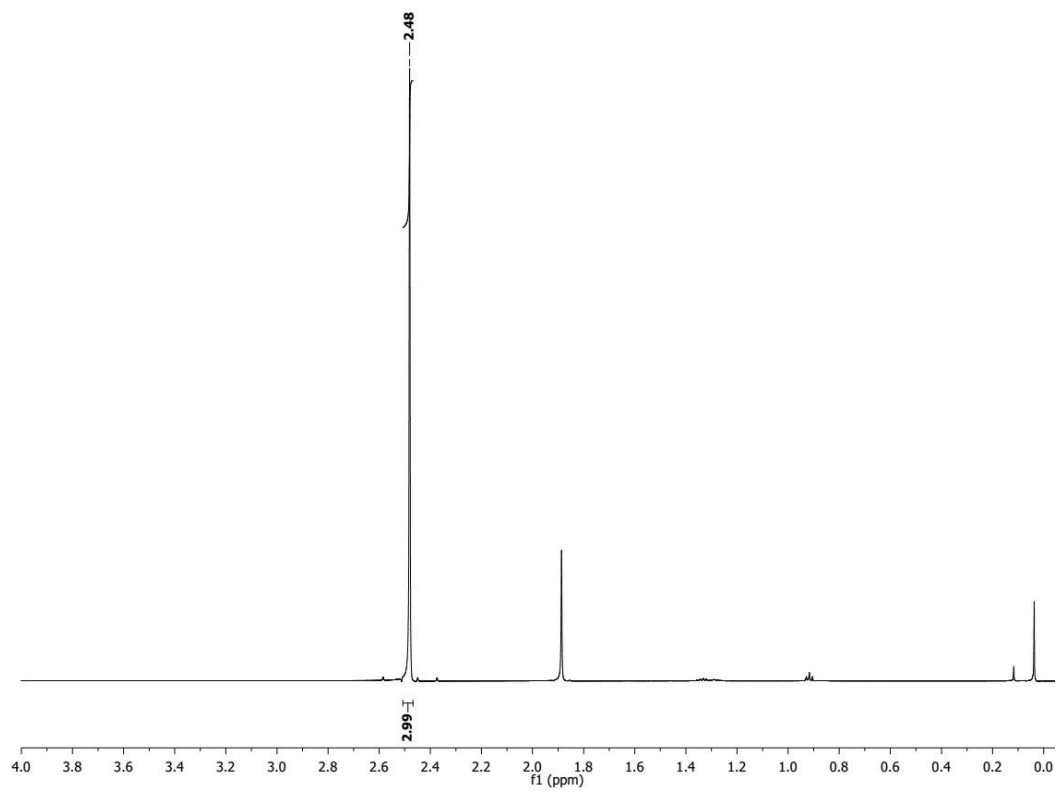

<sup>13</sup>C NMR of Compound 3d

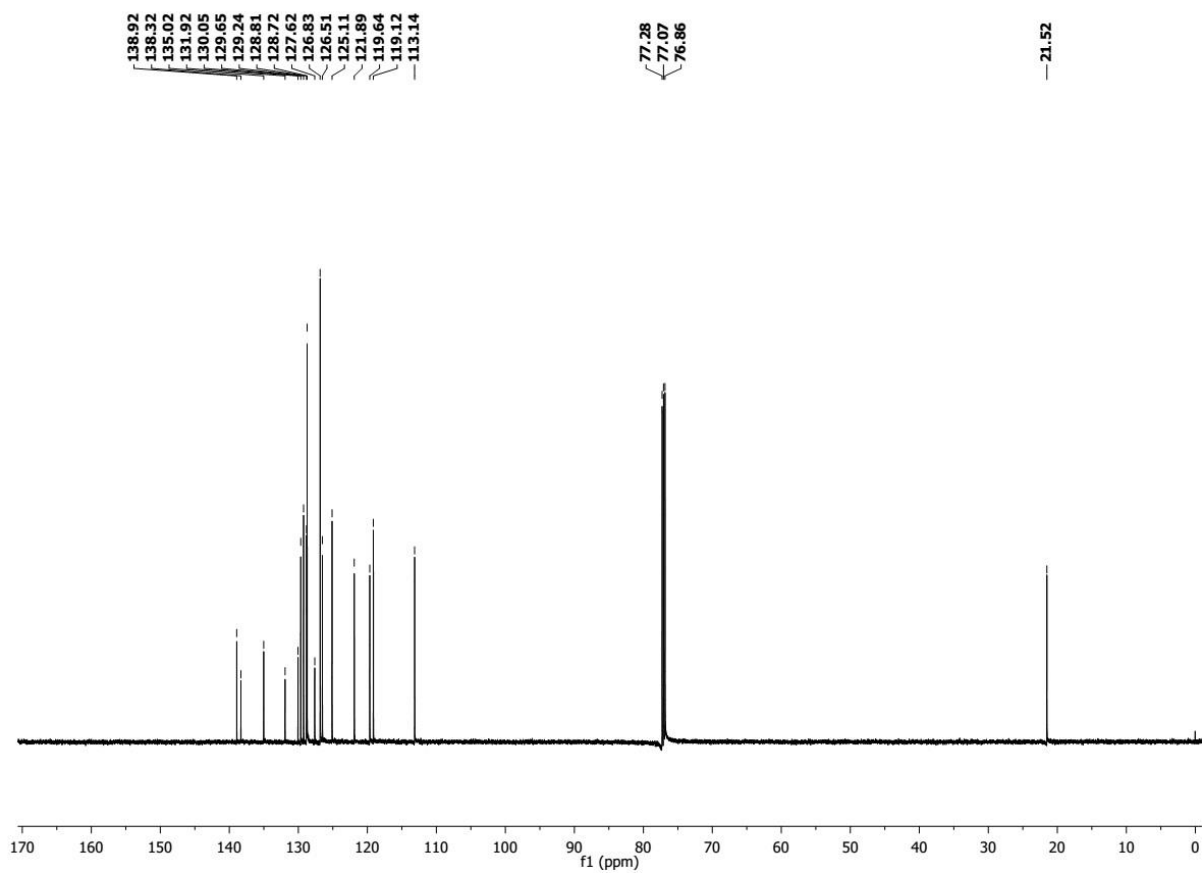

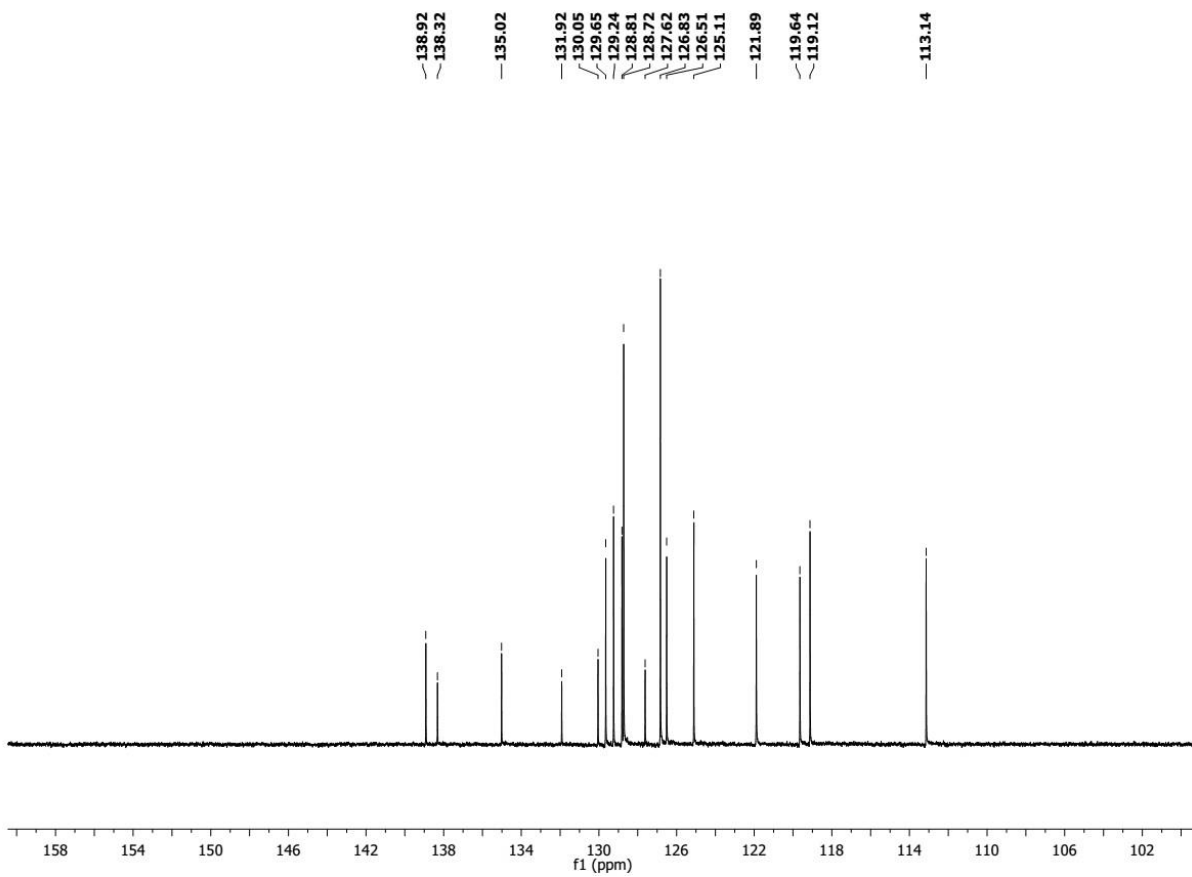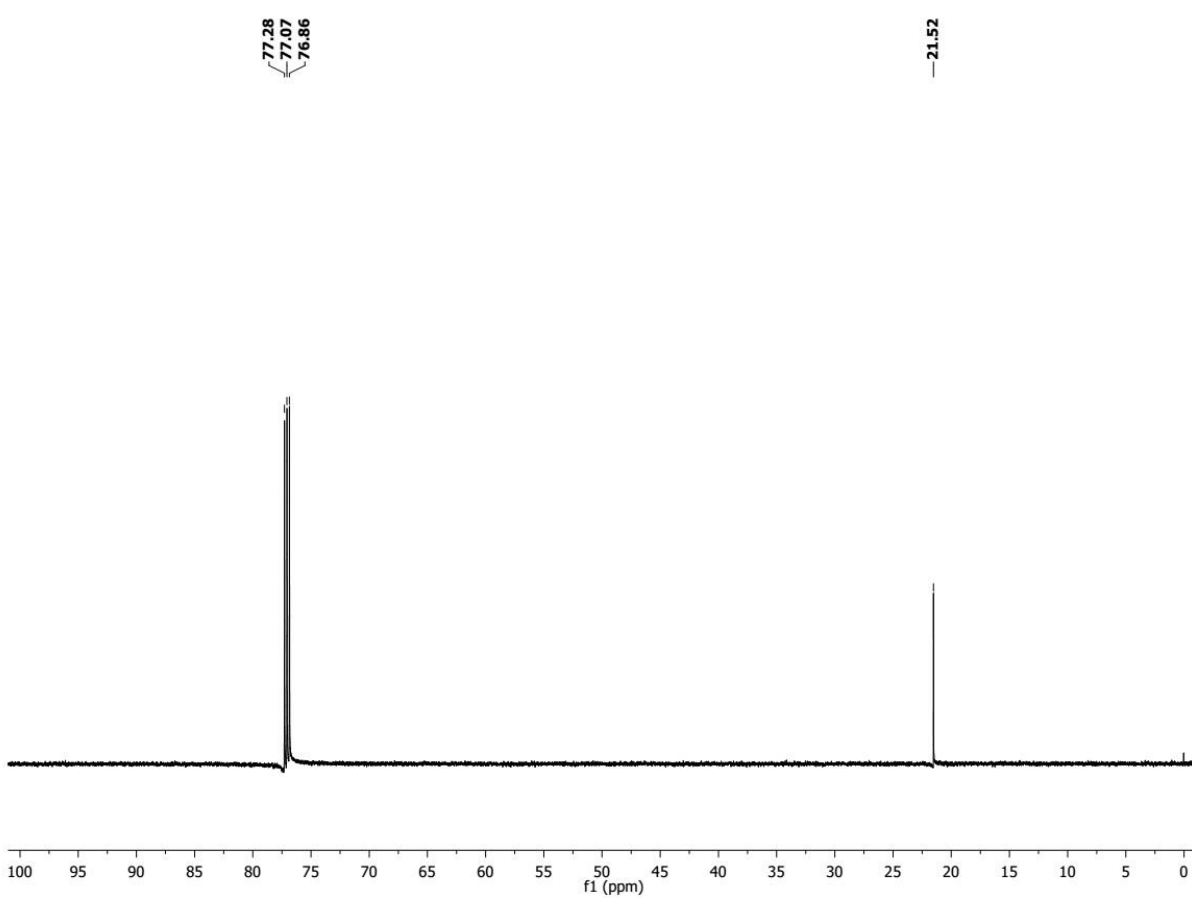

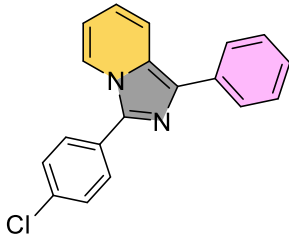

Compound (3e)

LC-MS analysis of Compound 3e

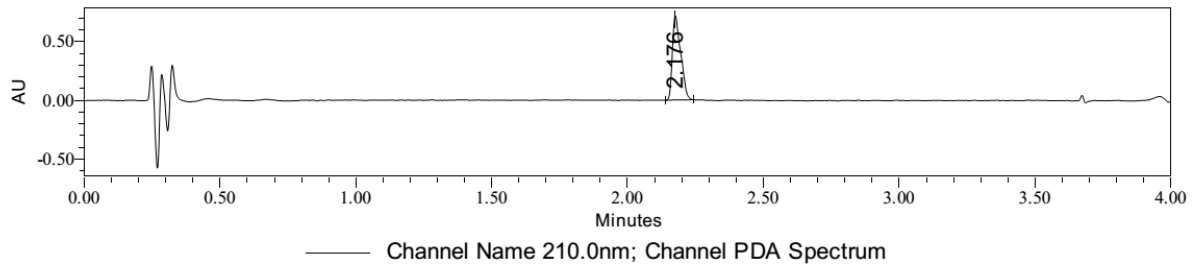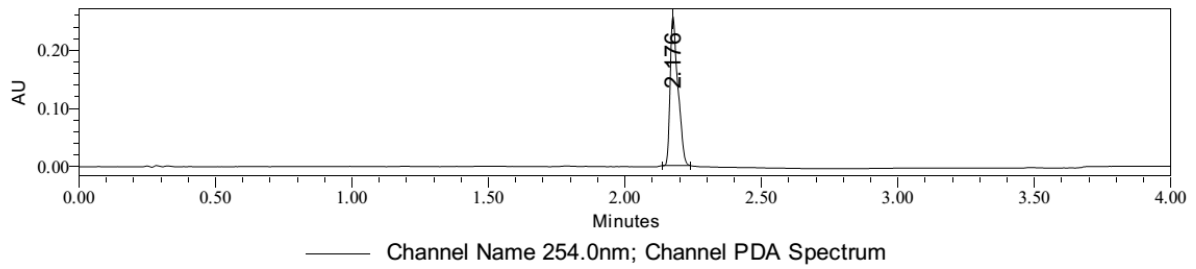

**Peak Results**  
Channel: PDA Spectrum

|   | RT    | Base Peak (m/z) | Height | Area    | % Area | Channel      | Channel Name |
|---|-------|-----------------|--------|---------|--------|--------------|--------------|
| 1 | 2.176 |                 | 257212 | 506509  | 100.00 | PDA Spectrum | 254.0nm      |
| 2 | 2.176 |                 | 716419 | 1524302 | 100.00 | PDA Spectrum | 210.0nm      |

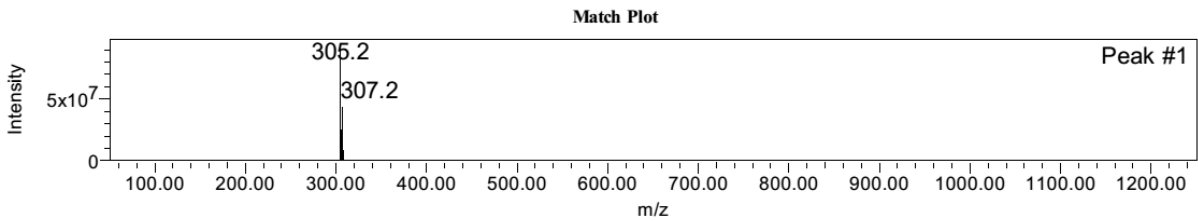

Base Peak 305.16 Channel Description 1: QDa Positive(+) Scan (60.00-1250.00)Da, Centroid, CV=10 - AVG (0.1:2.1;2.5:3.8) x 20.000 Th: 0.100 Retention Time 2.207

<sup>1</sup>H NMR of Compound 3e

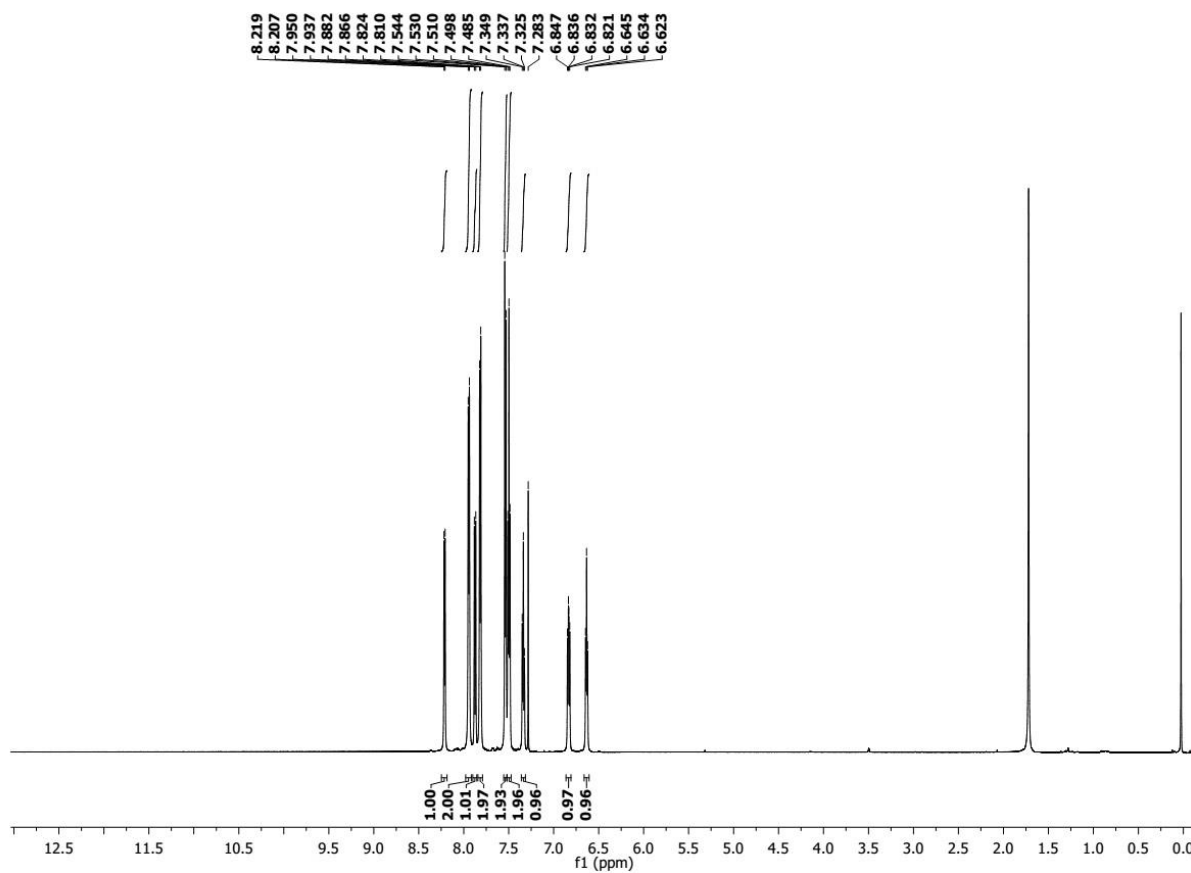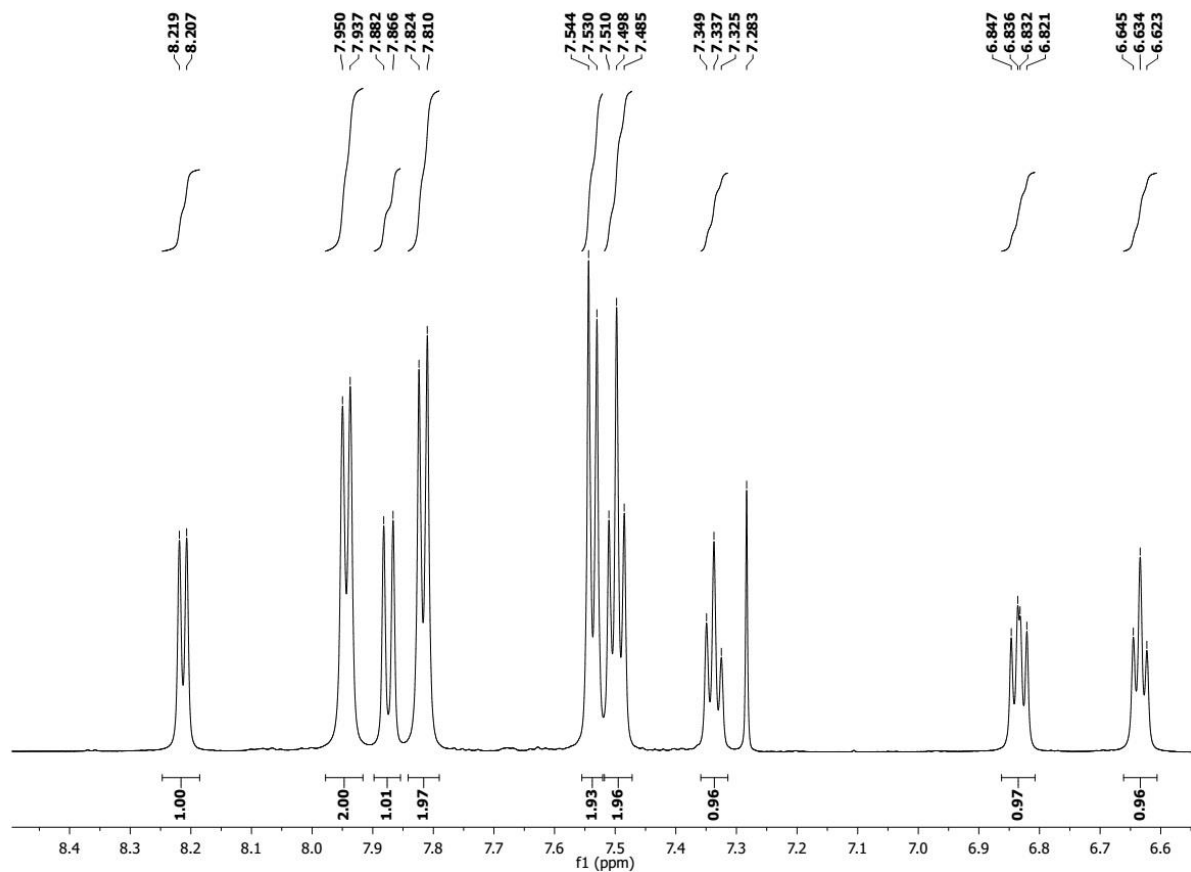

# <sup>13</sup>C NMR of Compound 3e

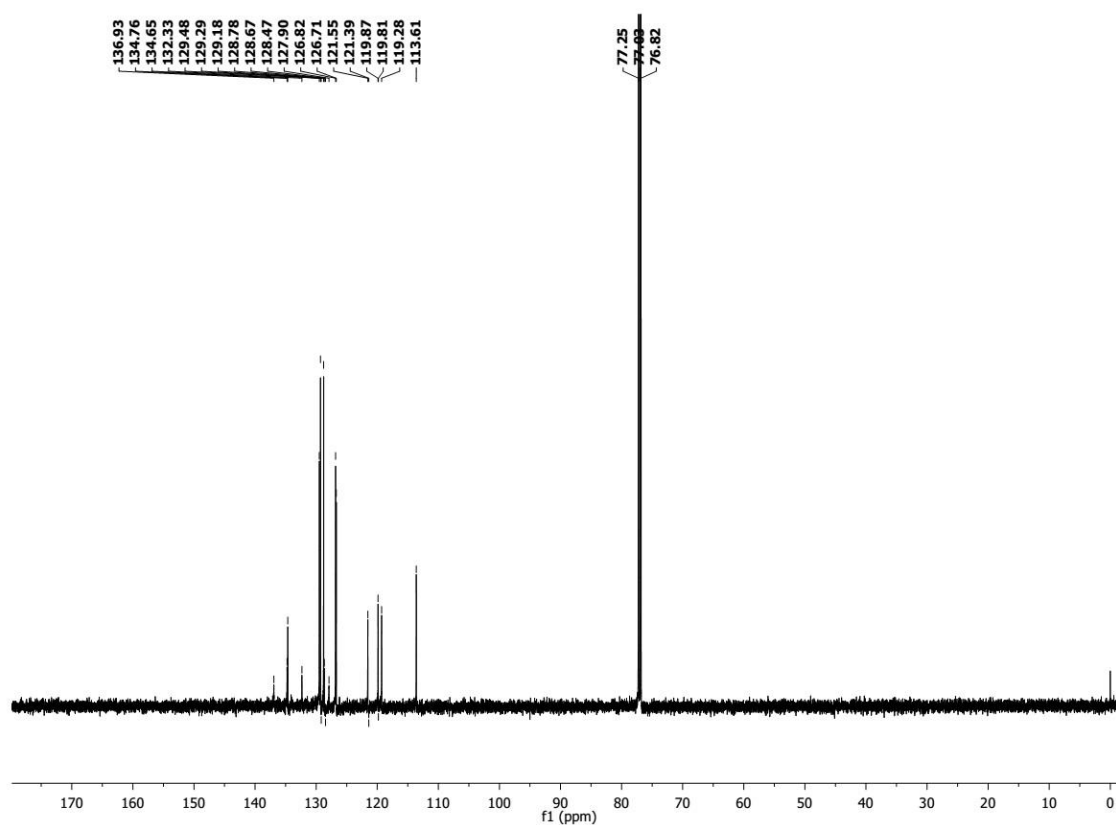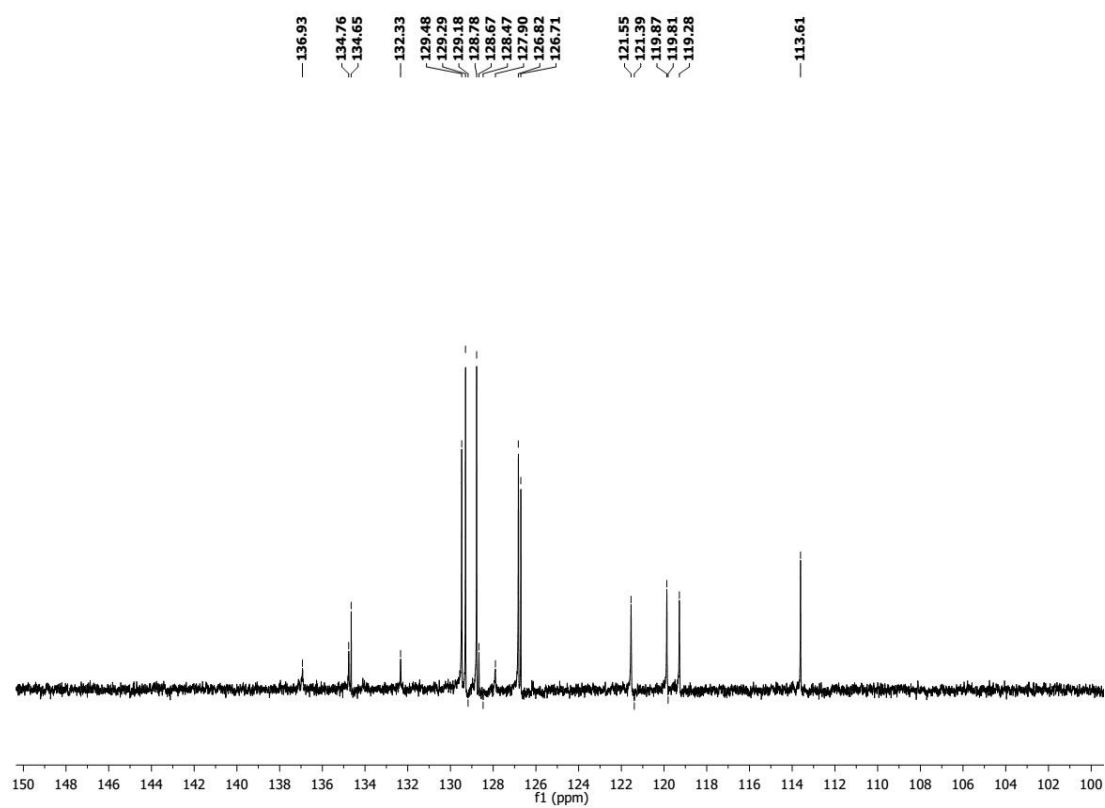

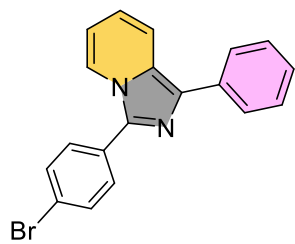

Compound (3f)

$^1\text{H}$  NMR of Compound 3f

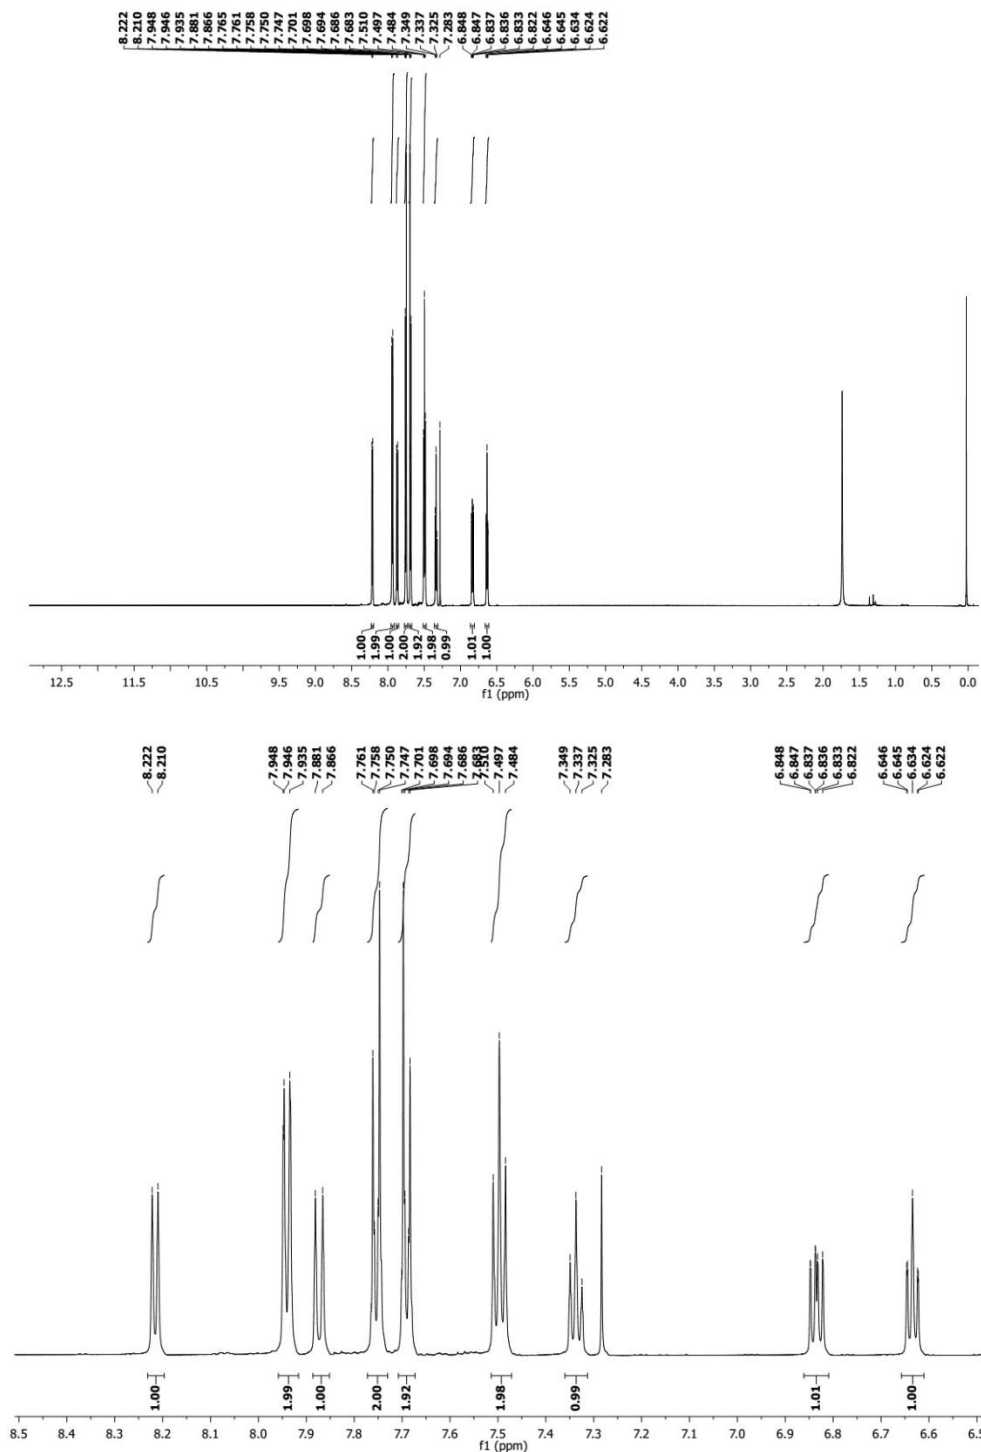

<sup>13</sup>C NMR of Compound 3f

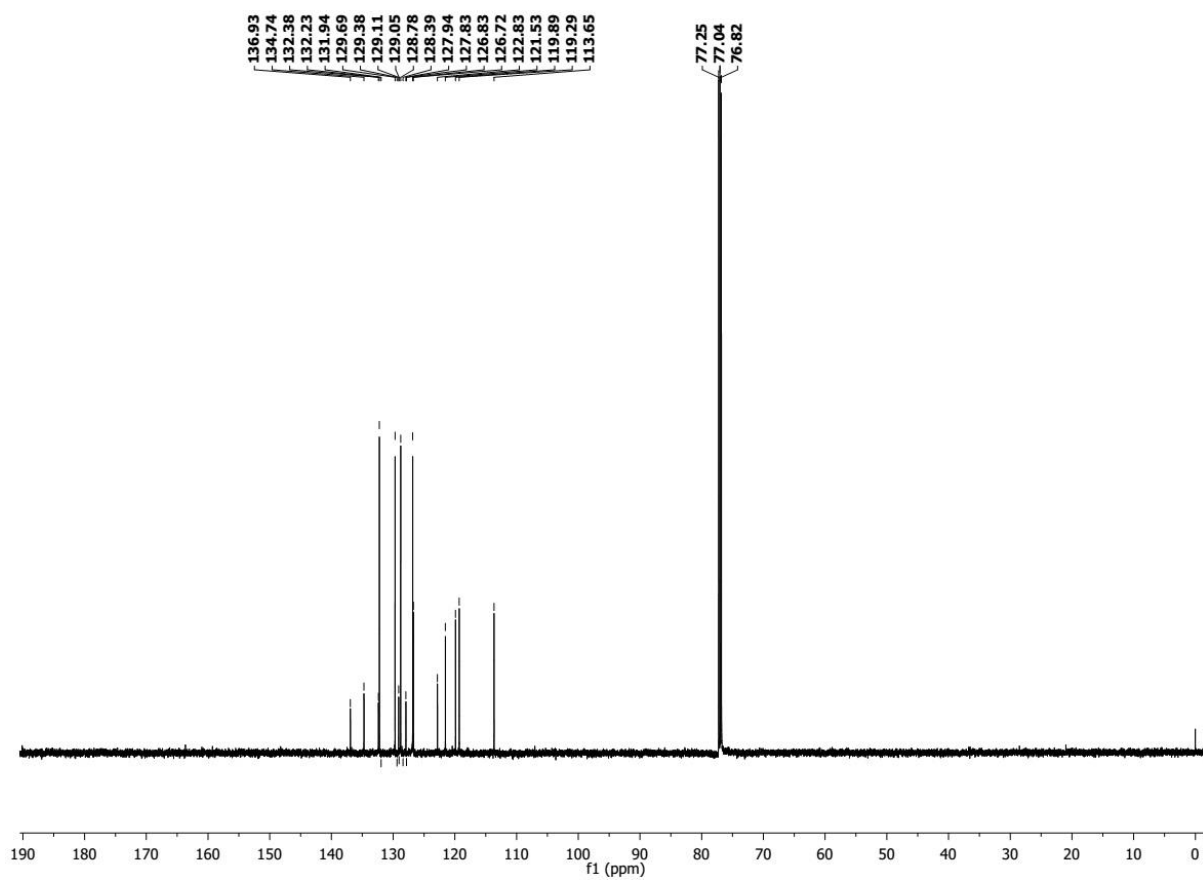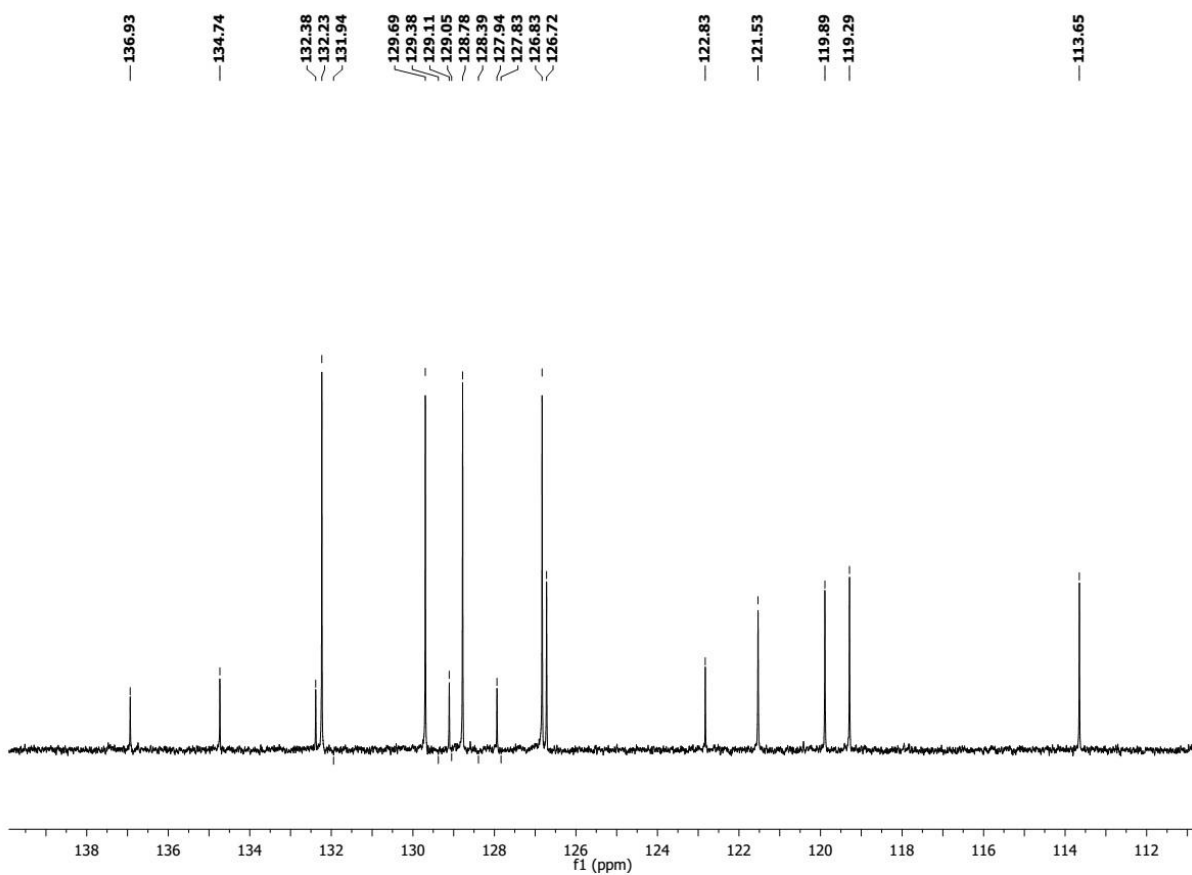

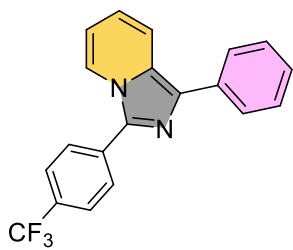

Compound (3g)

$^1\text{H}$  NMR of Compound 3g

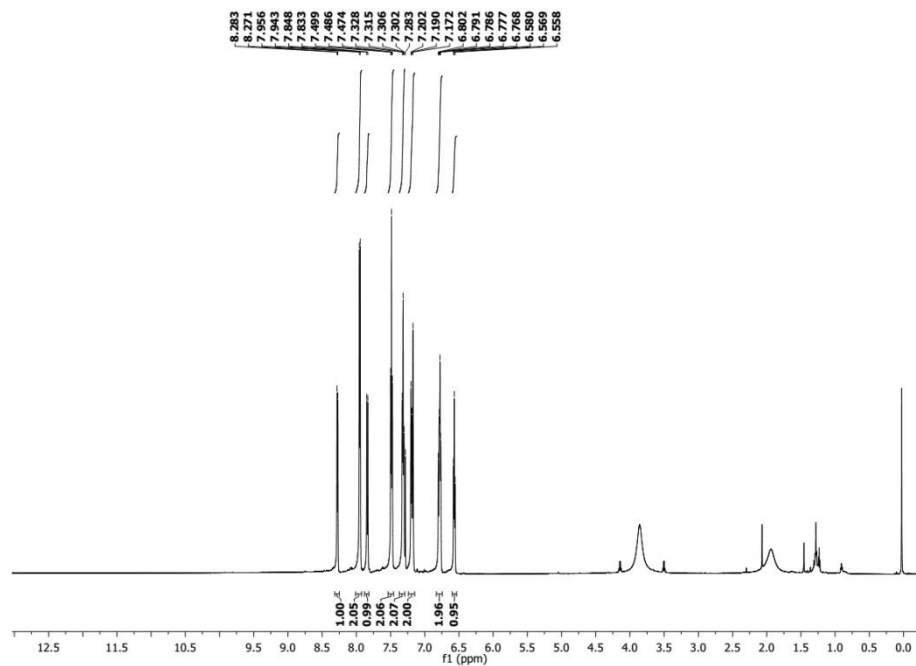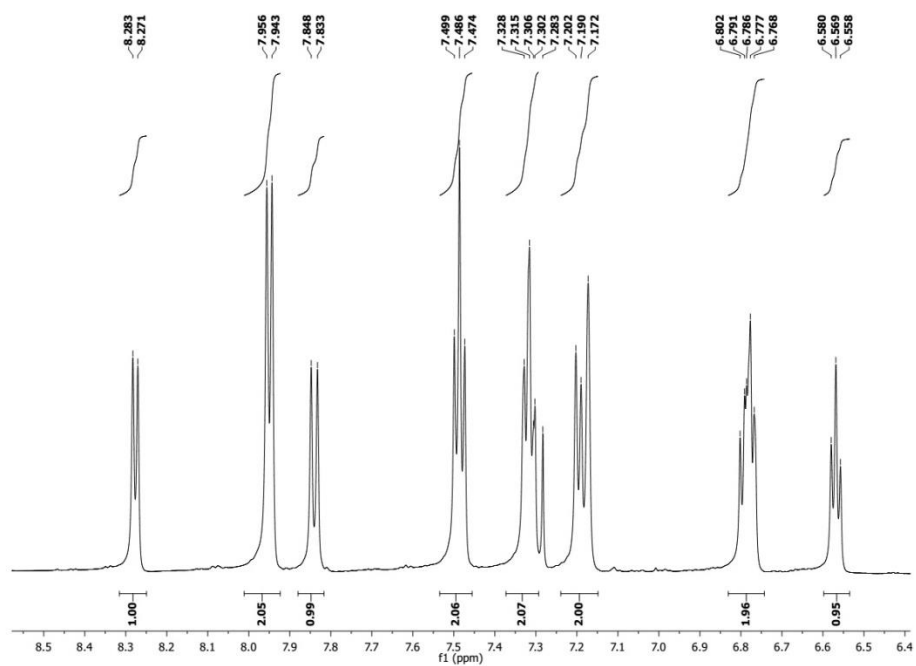



<sup>13</sup>C NMR of Compound 3g

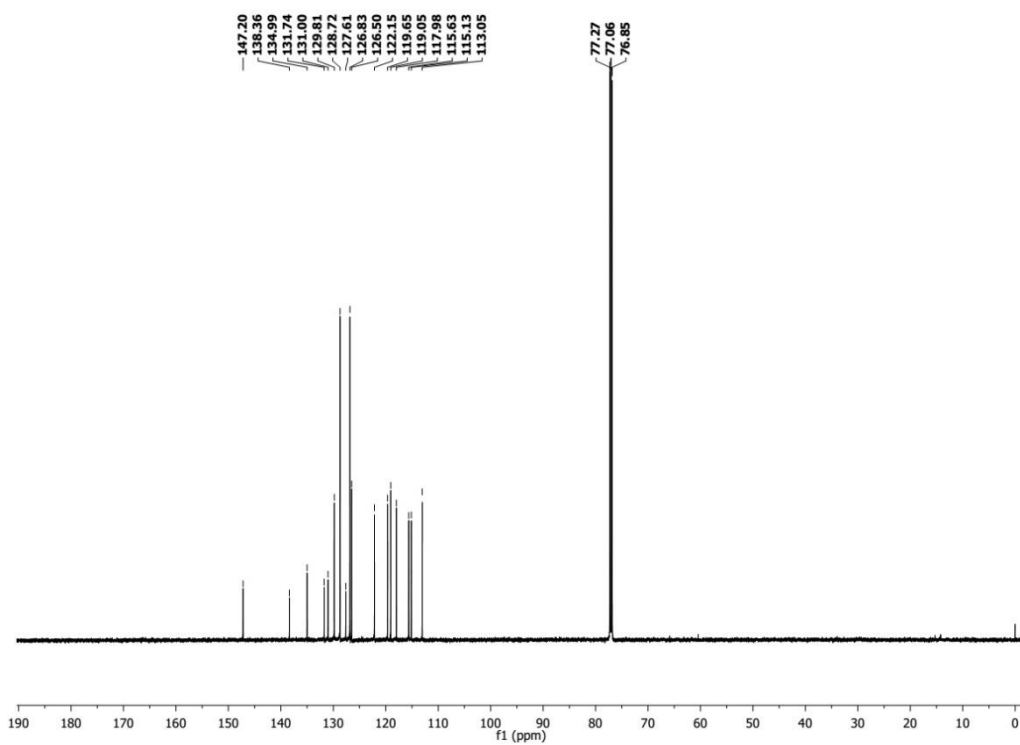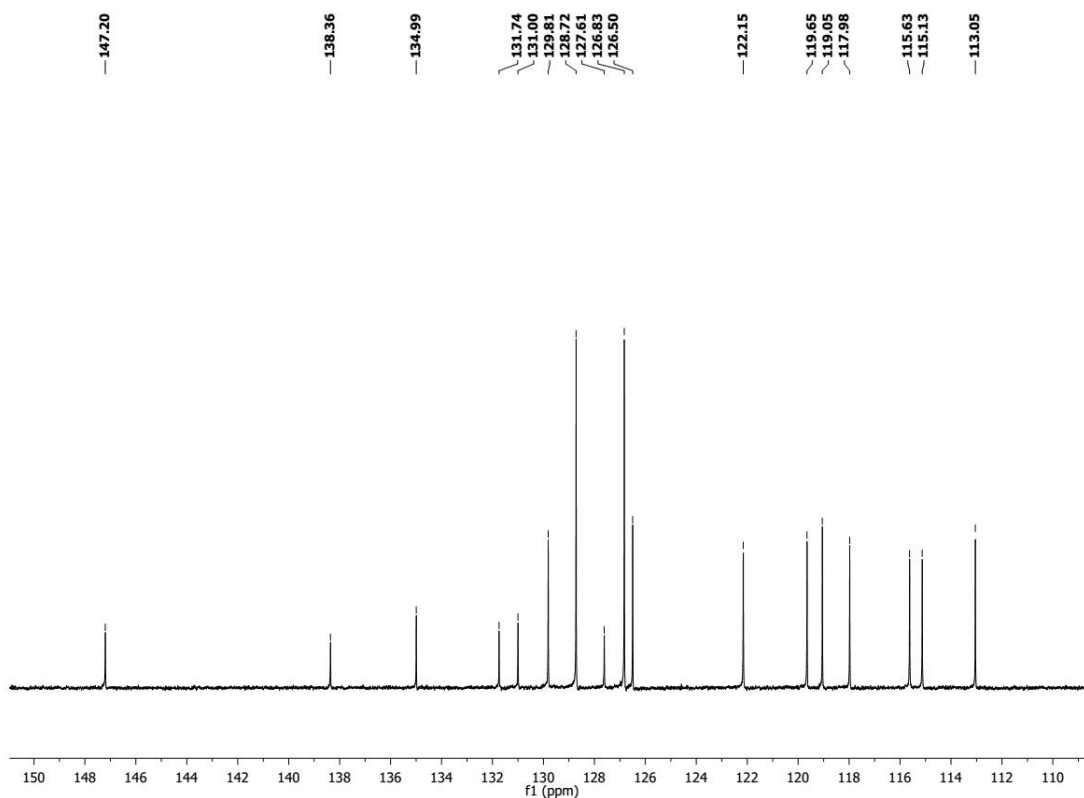

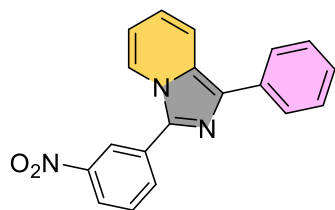

Compound (3h)

$^1\text{H}$  NMR of Compound 3h

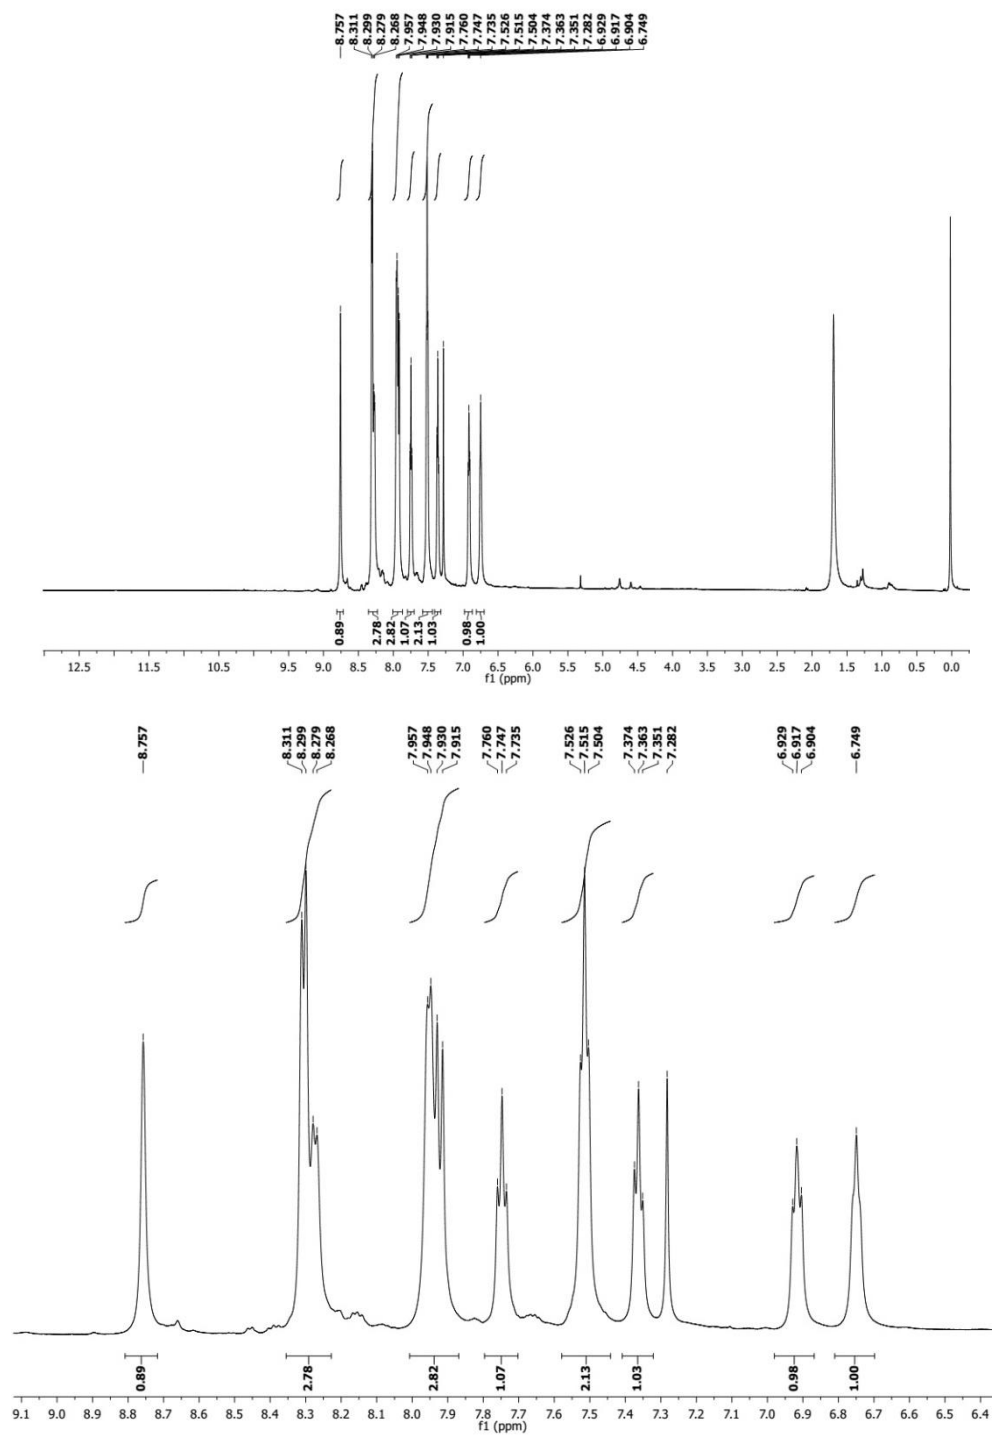

<sup>13</sup>C NMR of Compound 3h

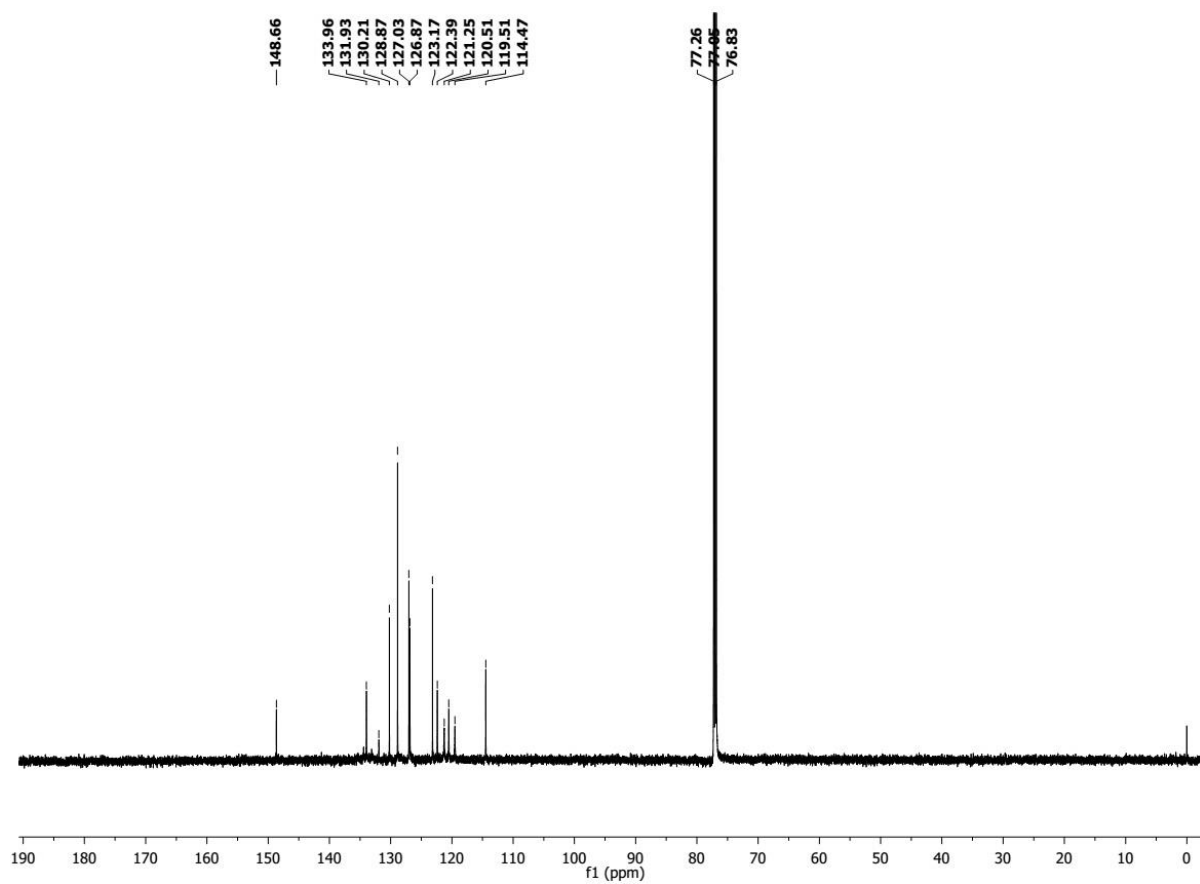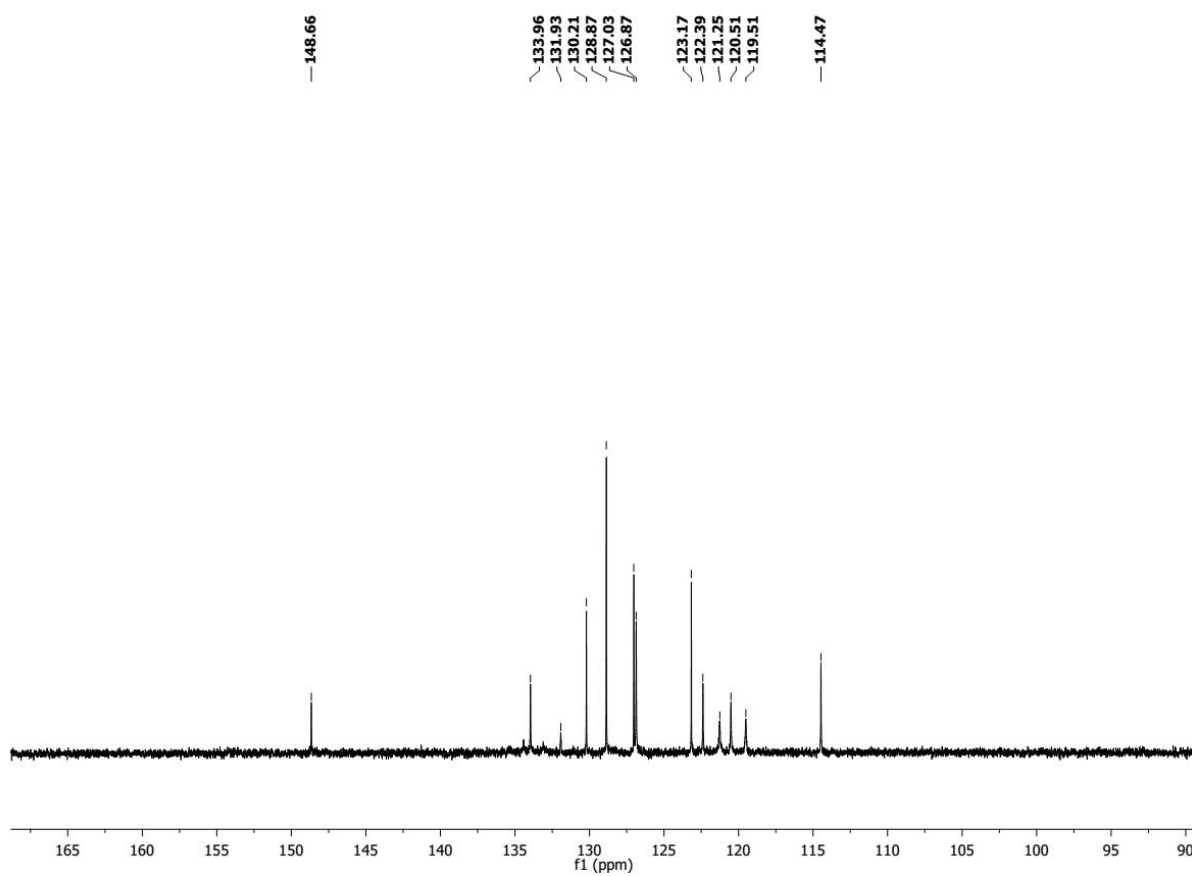

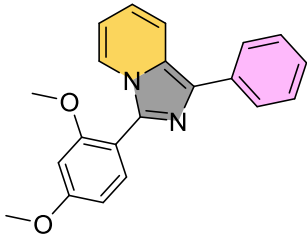

Compound (3i)

<sup>1</sup>H NMR of Compound 3i

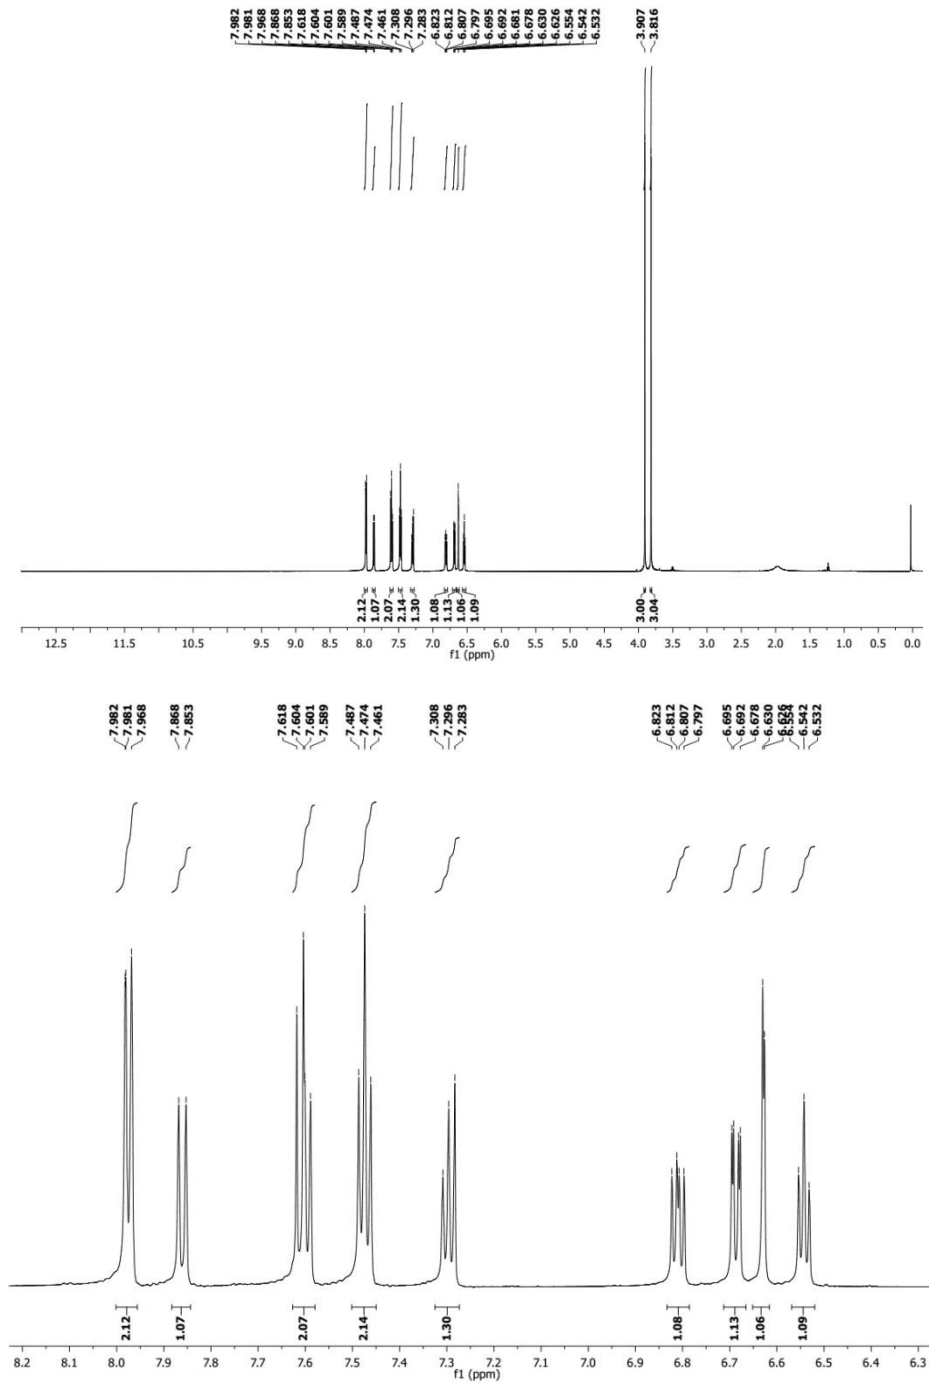

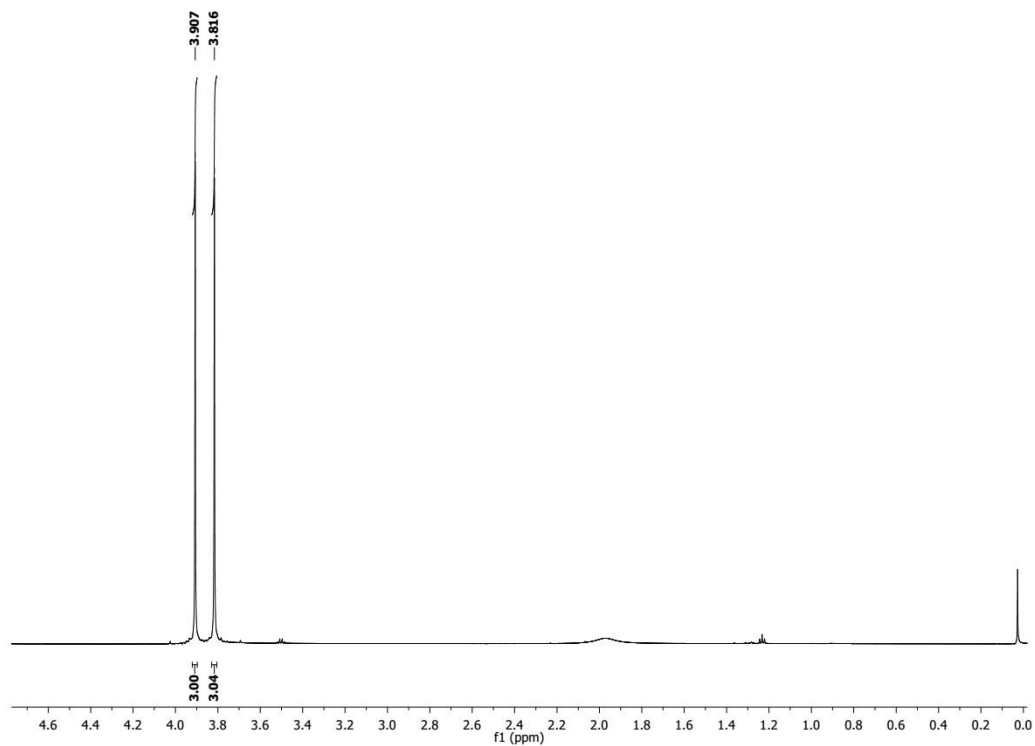

<sup>13</sup>C NMR of Compound 3i

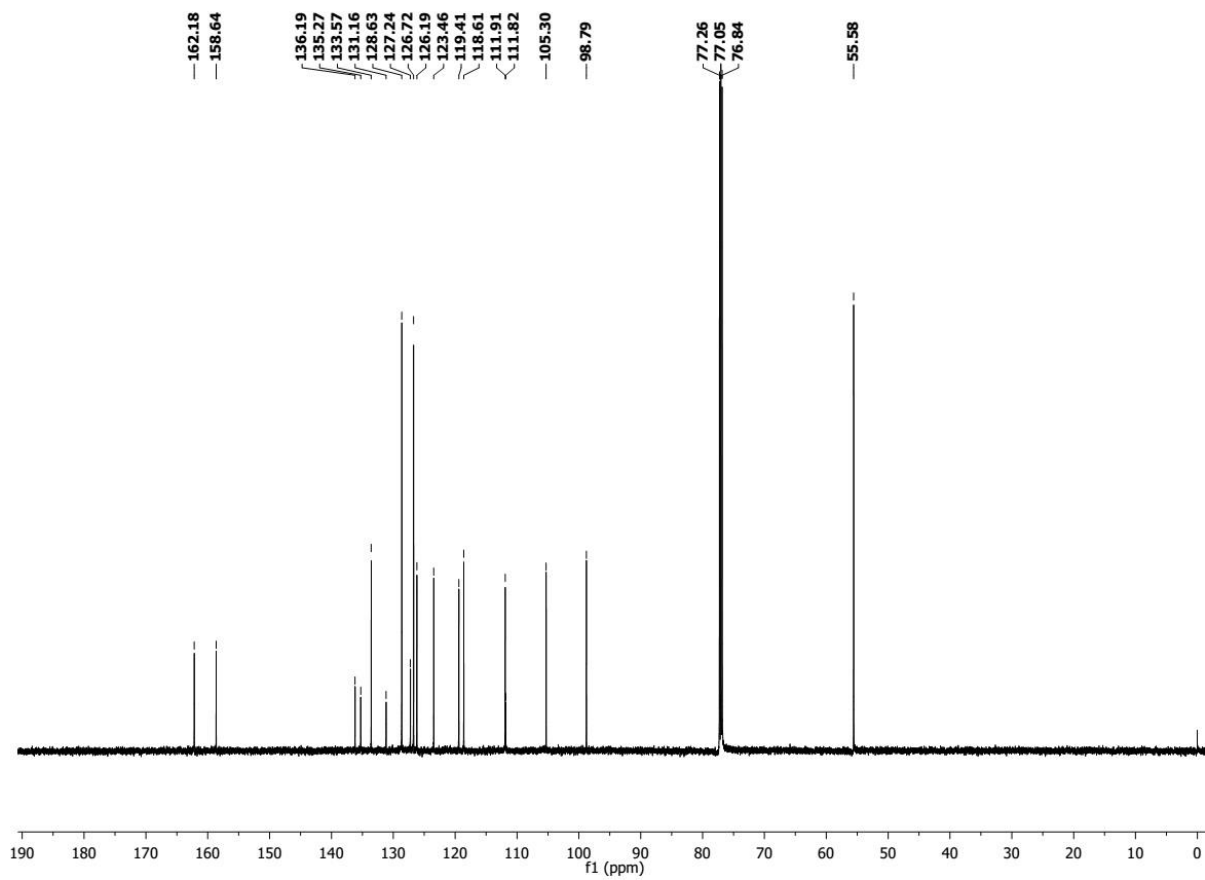

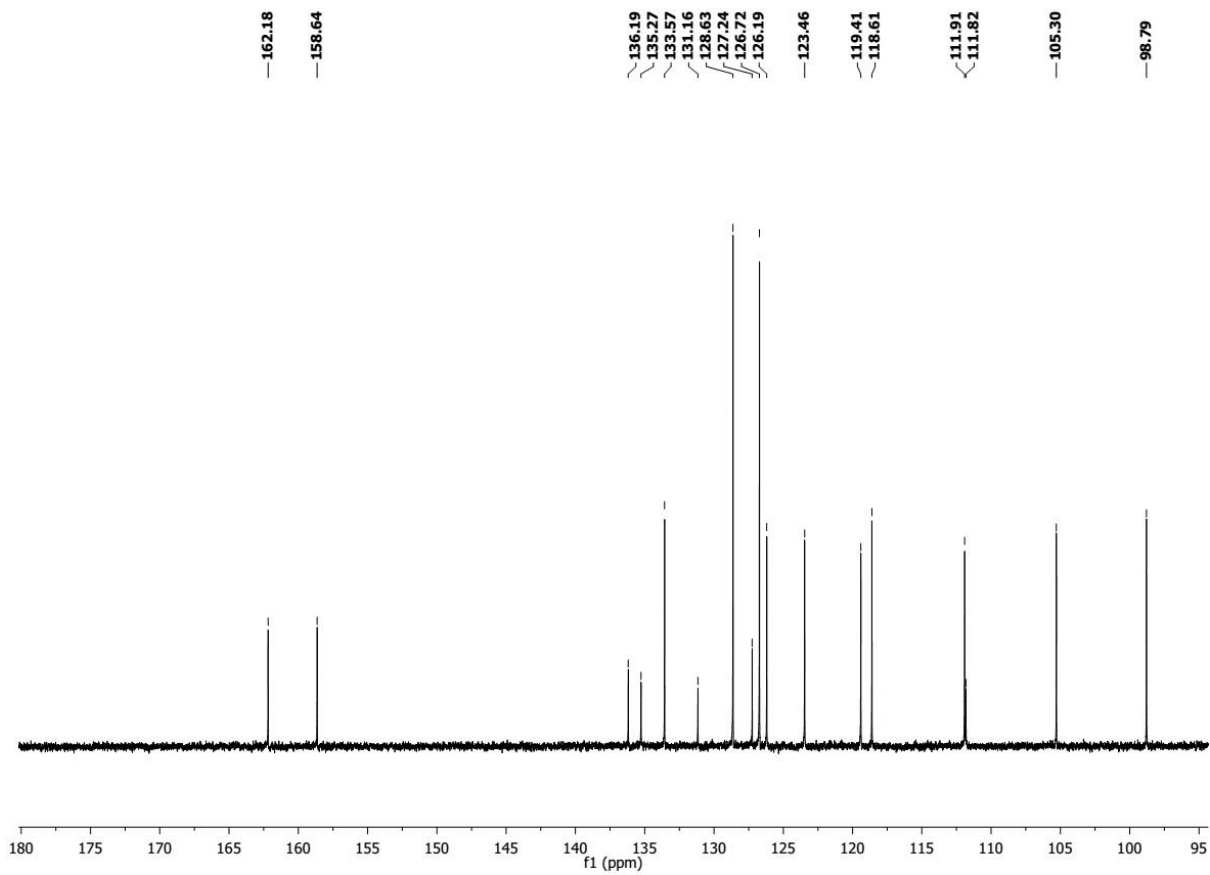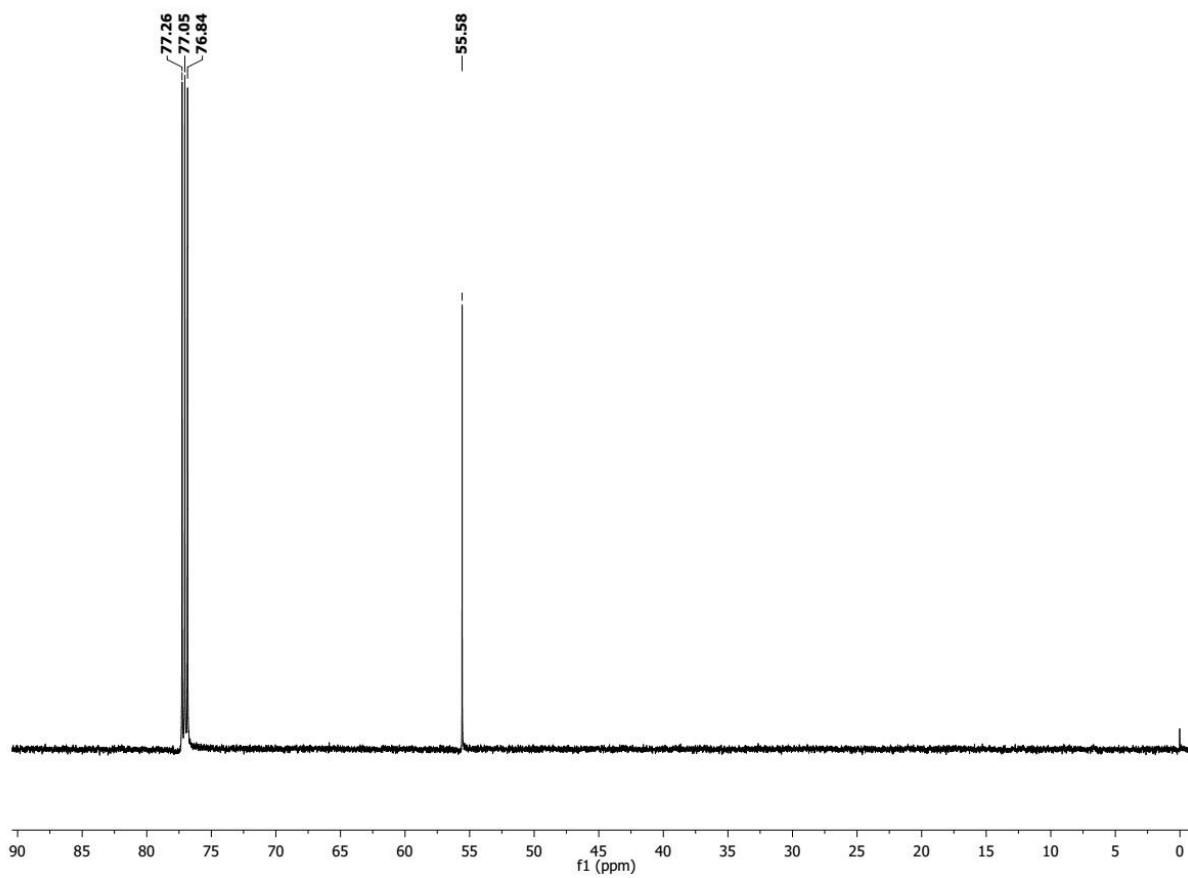

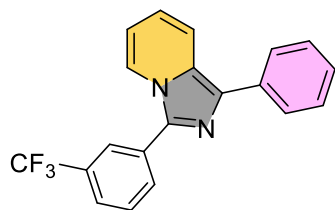

Compound (3j)

$^1\text{H}$  NMR of Compound 3j

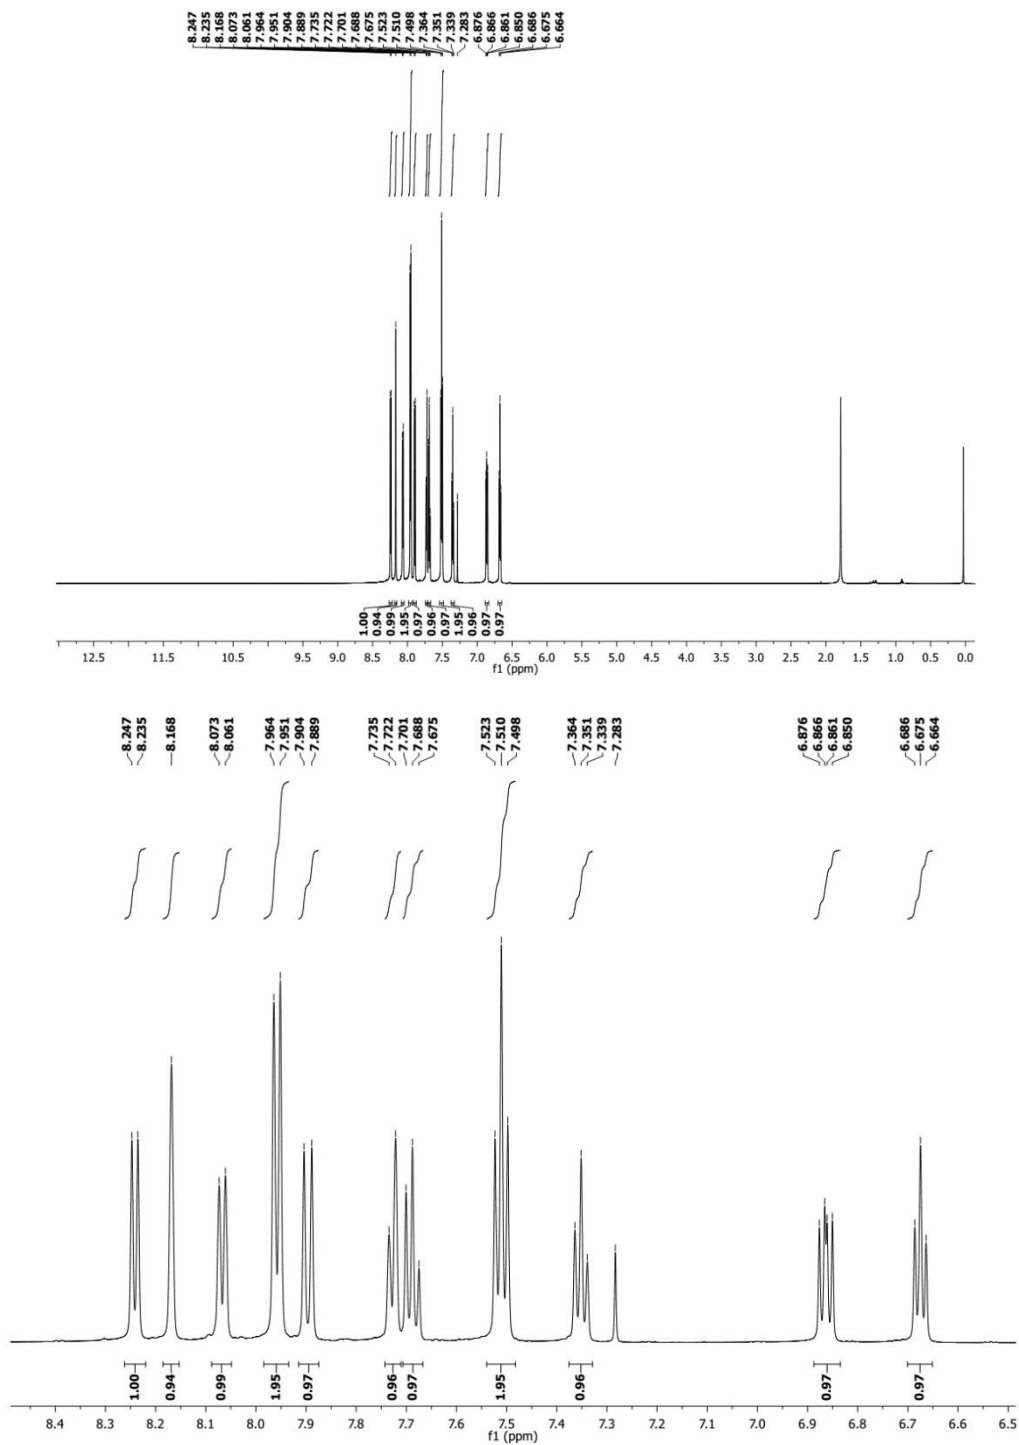

<sup>13</sup>C NMR of Compound 3j

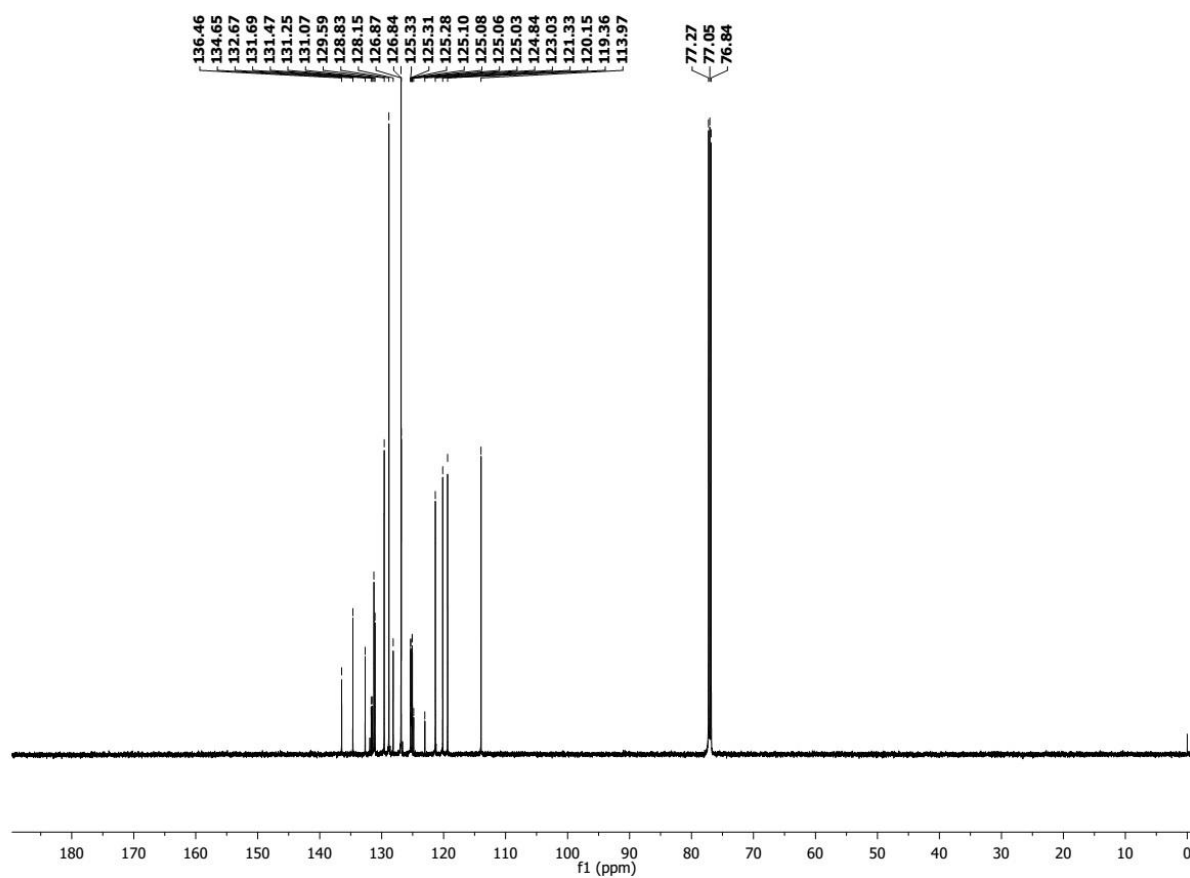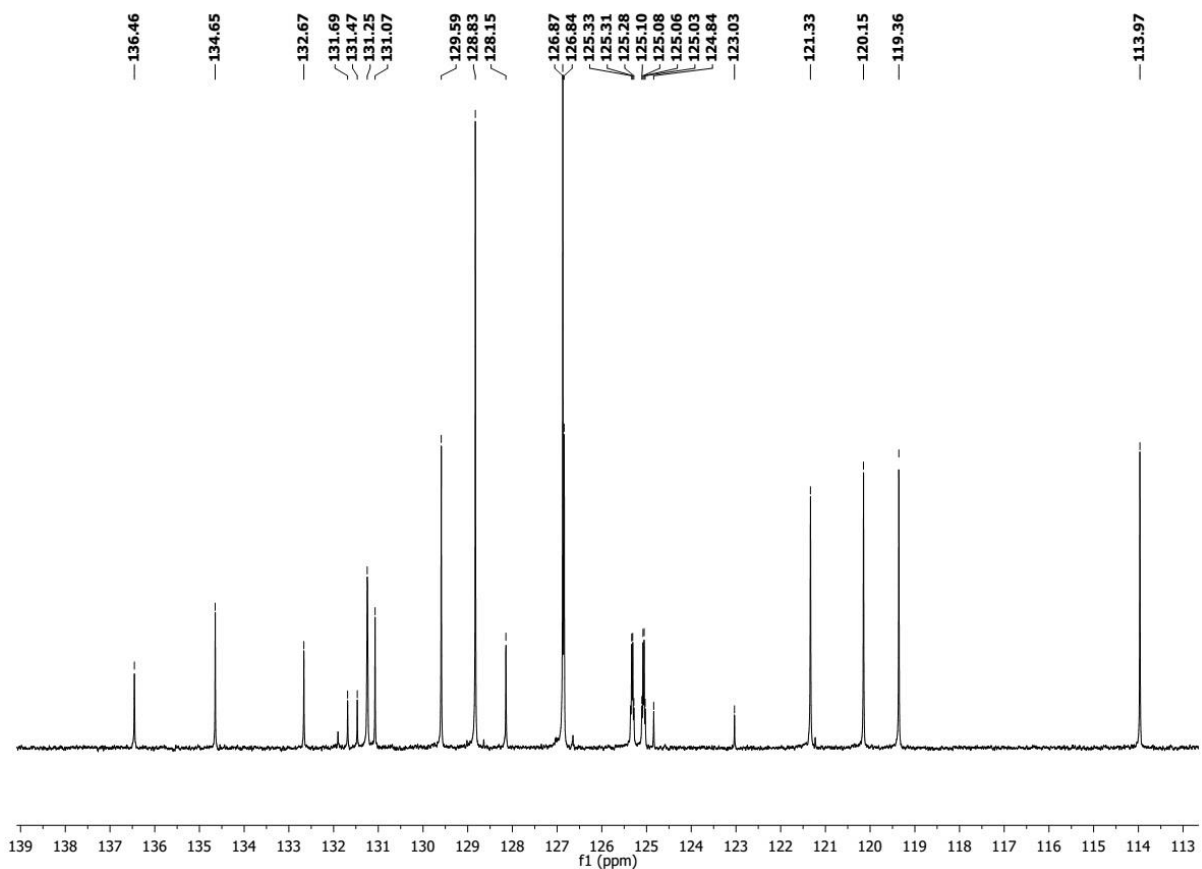



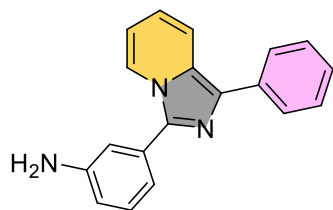

Compound (3k)

$^1\text{H}$  NMR of Compound 3k

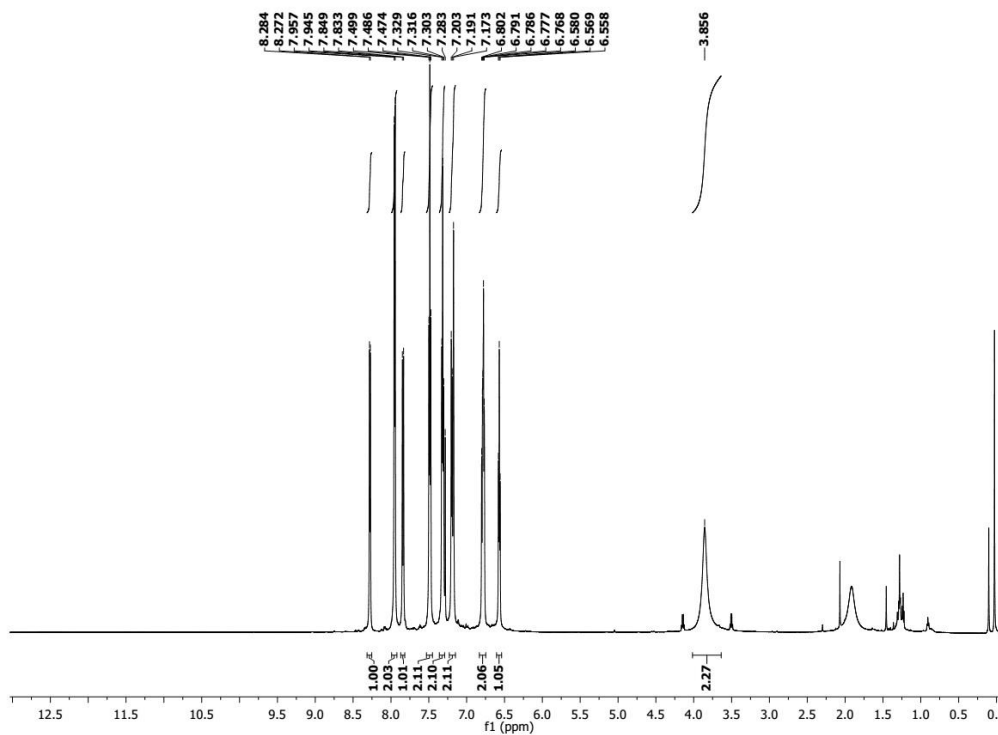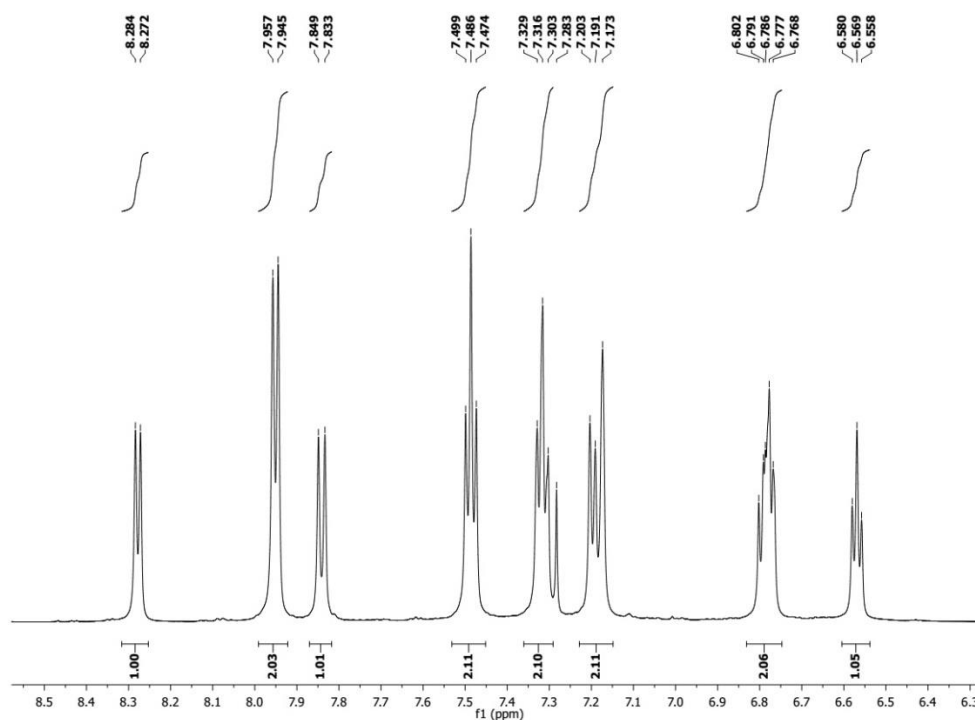

<sup>13</sup>C NMR of Compound 3k

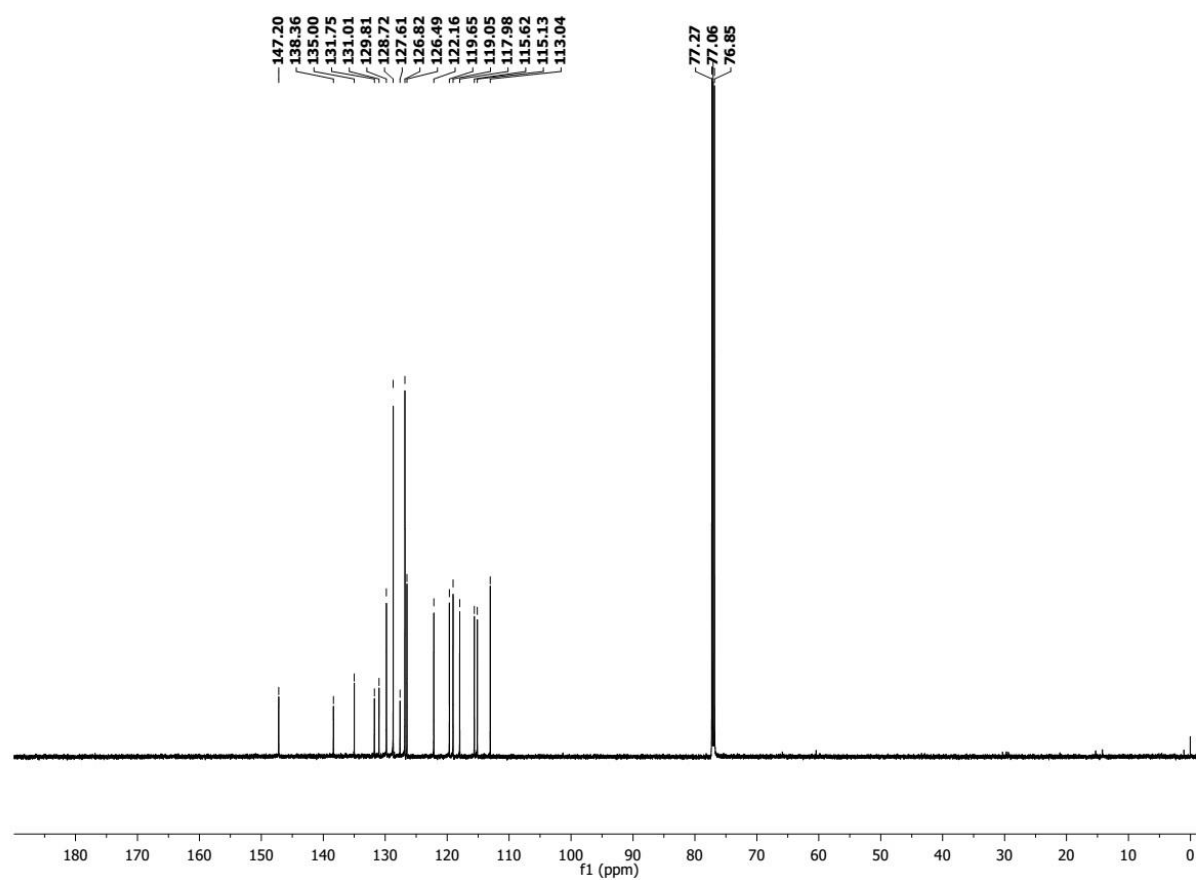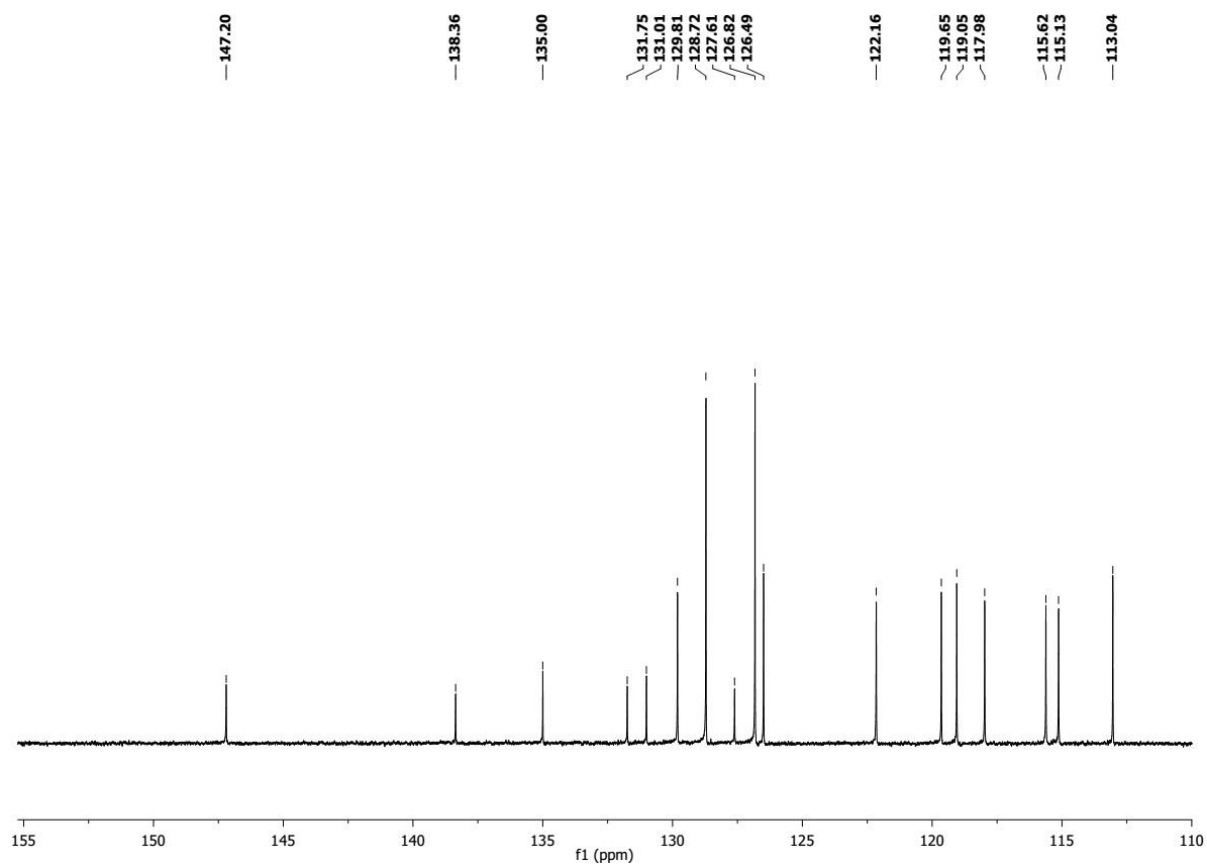

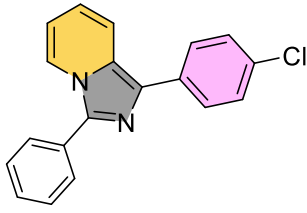

Compound (3l)

LC-MS analysis of Compound 3l

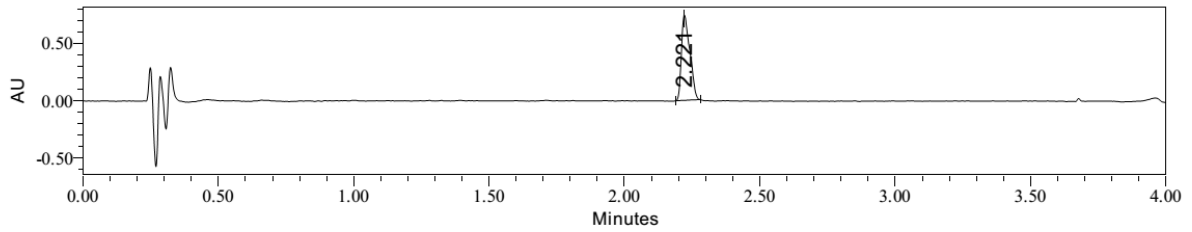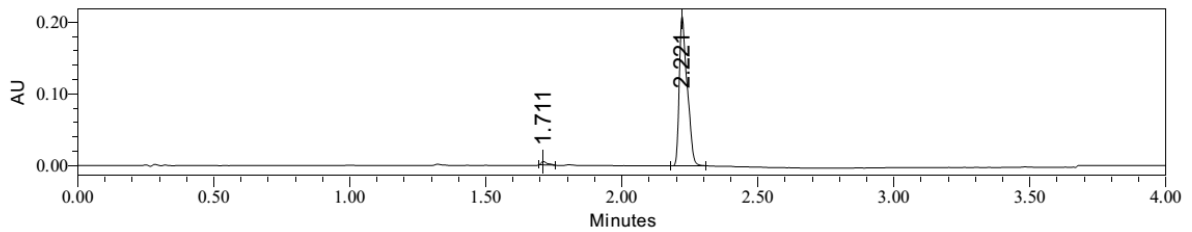

Peak Results  
Channel: PDA Spectrum

|   | RT    | Base Peak (m/z) | Height | Area    | % Area | Channel      | Channel Name |
|---|-------|-----------------|--------|---------|--------|--------------|--------------|
| 1 | 1.711 |                 | 4749   | 7451    | 1.74   | PDA Spectrum | 254.0nm      |
| 2 | 2.221 |                 | 208743 | 421874  | 98.26  | PDA Spectrum | 254.0nm      |
| 3 | 2.221 |                 | 743355 | 1605691 | 100.00 | PDA Spectrum | 210.0nm      |

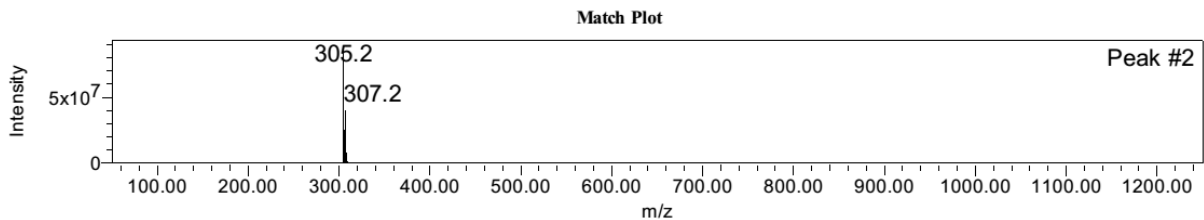

Base Peak 305.15 Channel Description 1: QDa Positive(+) Scan (60.00-1250.00)Da, Centroid, CV=10 - AVG (1.8:2.1;0.1:1.3;2.4:3.9) x 20.000 Th: 0.010 Retention Time 2.251

<sup>1</sup>H NMR of Compound 31

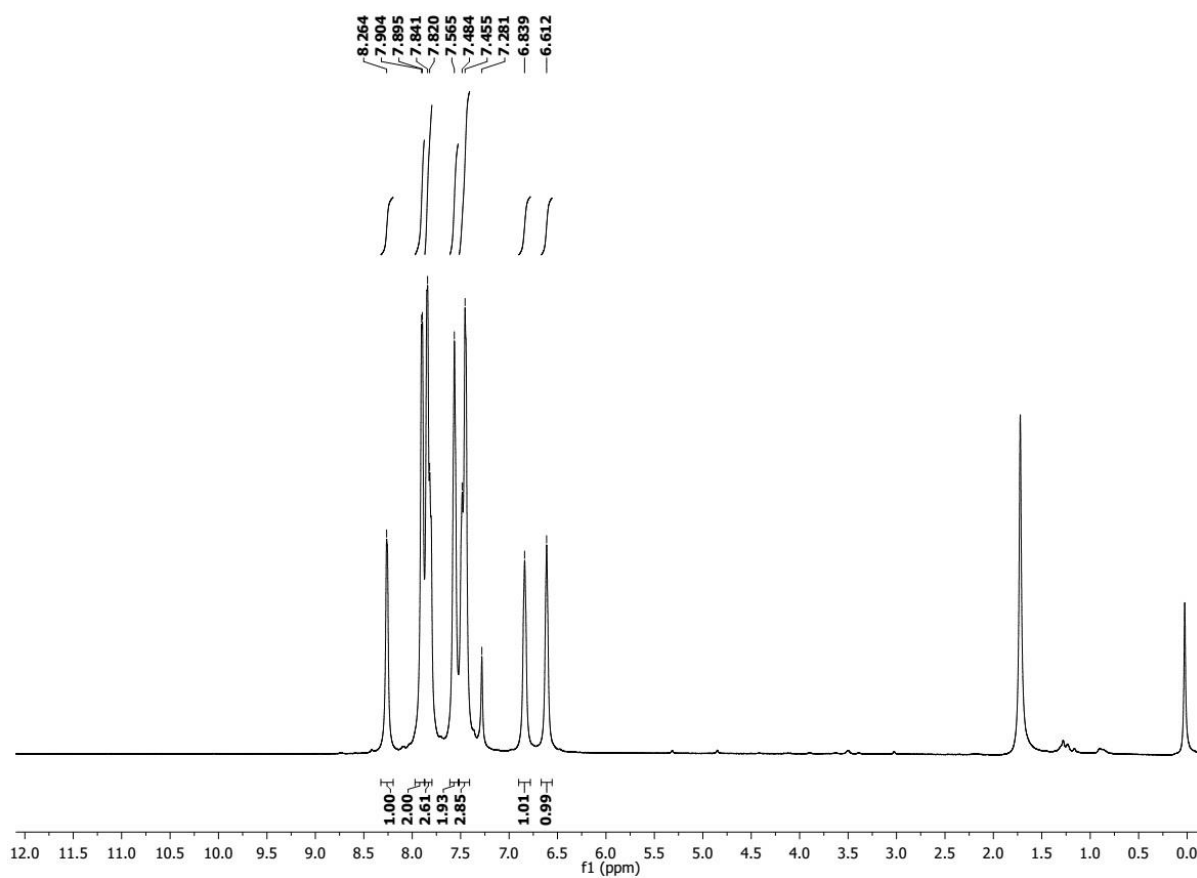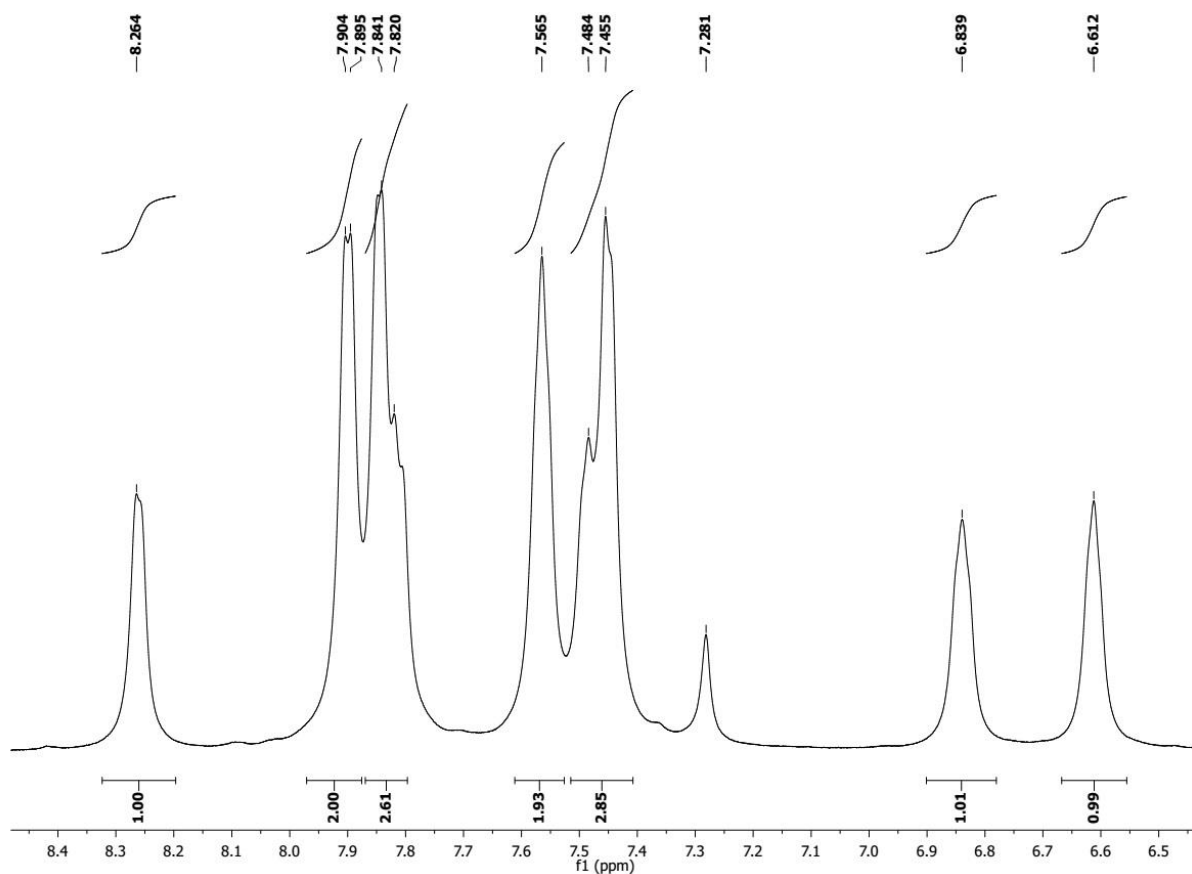

<sup>13</sup>C NMR of Compound 31

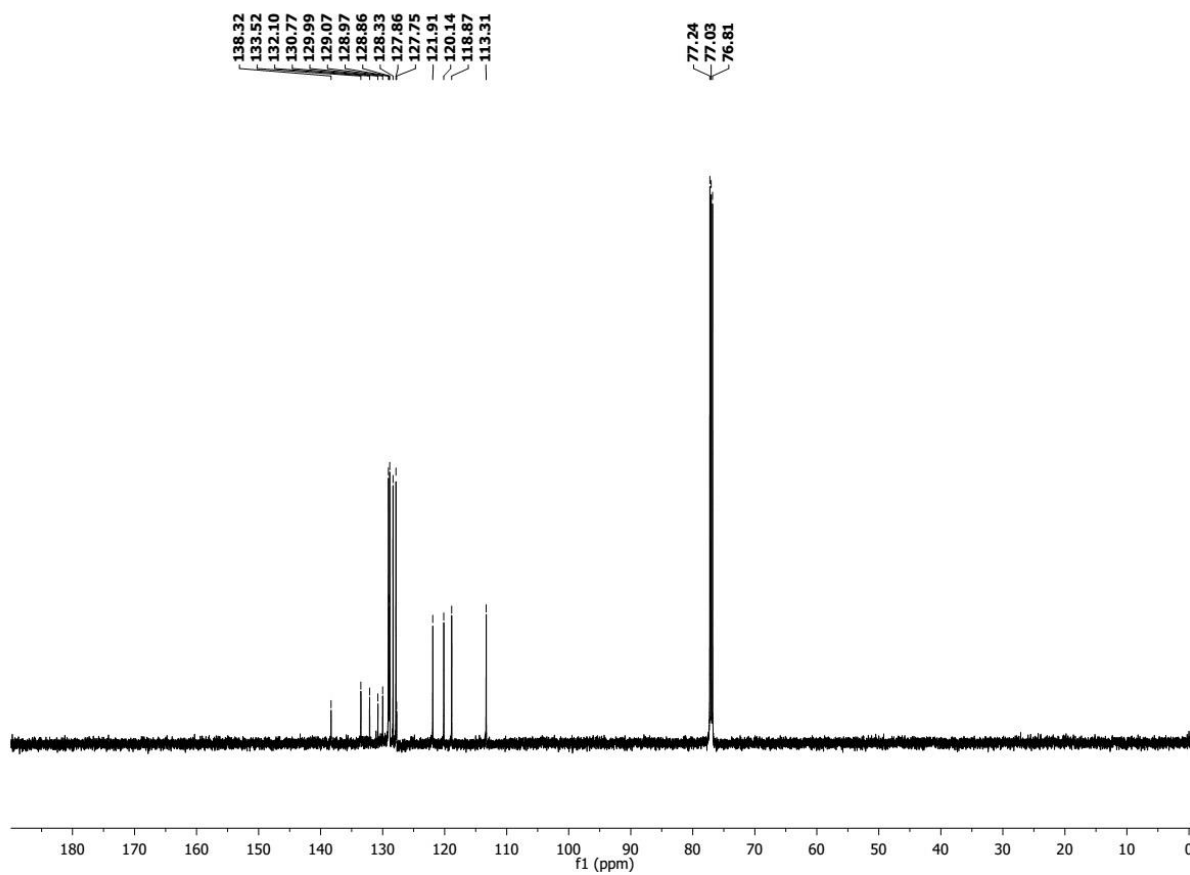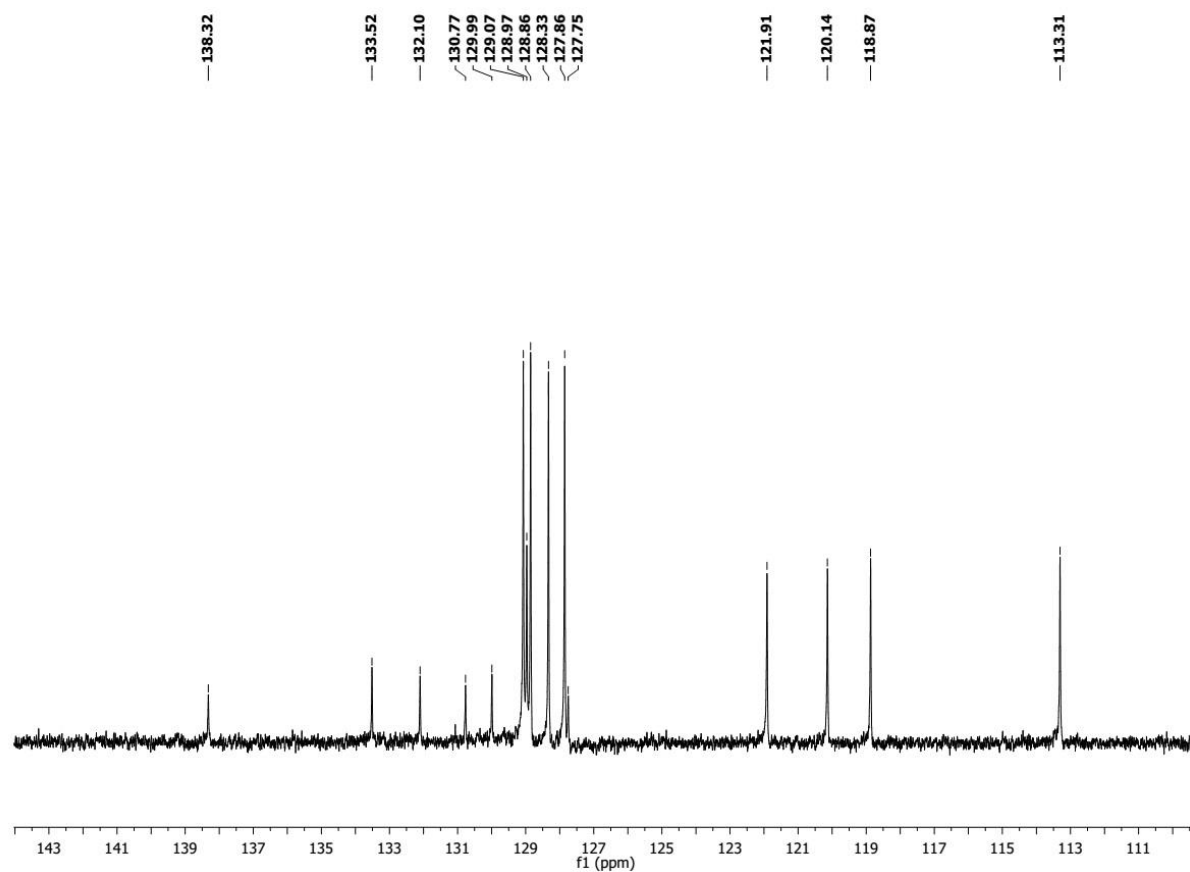

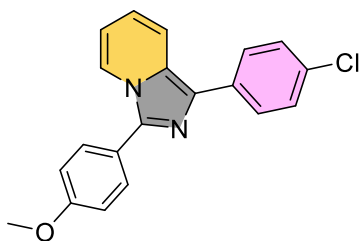

Compound (3m)

LC-MS analysis of Compound 3m

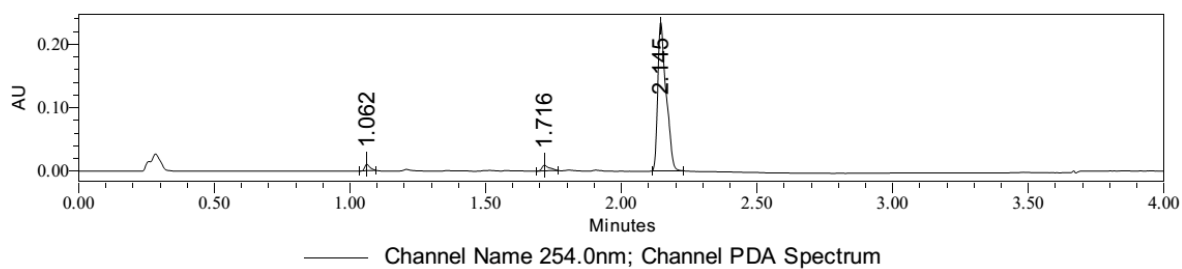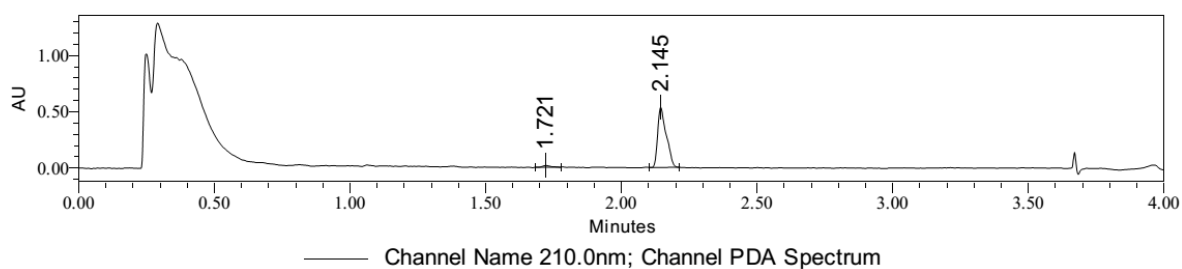

**Peak Results**  
Channel: PDA Spectrum

|   | RT    | Base Peak (m/z) | Height | Area    | % Area | Channel      | Channel Name |
|---|-------|-----------------|--------|---------|--------|--------------|--------------|
| 1 | 1.062 |                 | 10211  | 13613   | 2.56   | PDA Spectrum | 254.0nm      |
| 2 | 1.716 |                 | 8991   | 17321   | 3.26   | PDA Spectrum | 254.0nm      |
| 3 | 1.721 |                 | 15545  | 33244   | 2.75   | PDA Spectrum | 210.0nm      |
| 4 | 2.145 |                 | 533284 | 1177286 | 97.25  | PDA Spectrum | 210.0nm      |
| 5 | 2.145 |                 | 234635 | 500175  | 94.18  | PDA Spectrum | 254.0nm      |

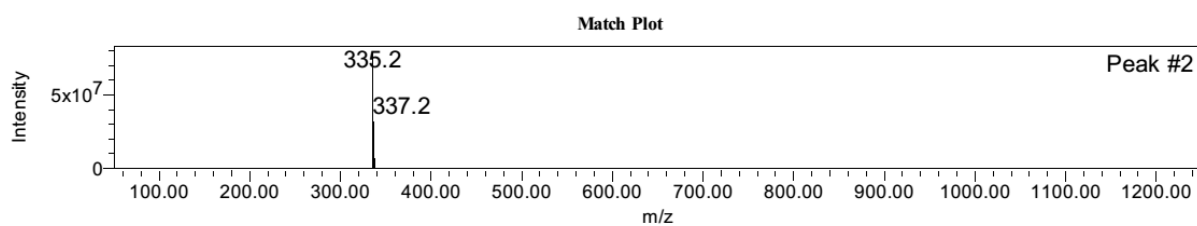

Base Peak 335.21 Channel Description 1: QDa Positive(+) Scan (60.00-1250.00)Da, Centroid, CV=10 - AVG (0.1:1.8;2.4:3.9) x 20.000 Th: 0.010 Retention Time 2.177

<sup>1</sup>H NMR of Compound 3m

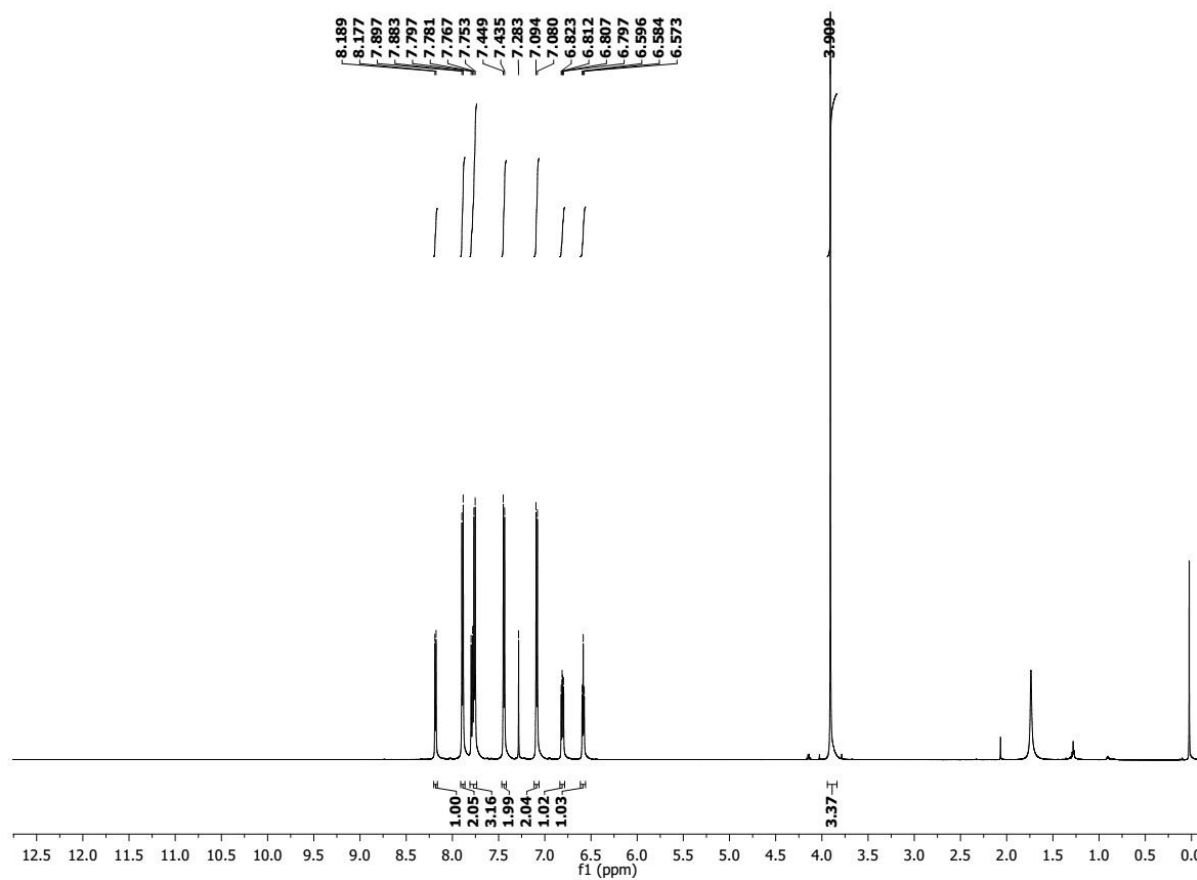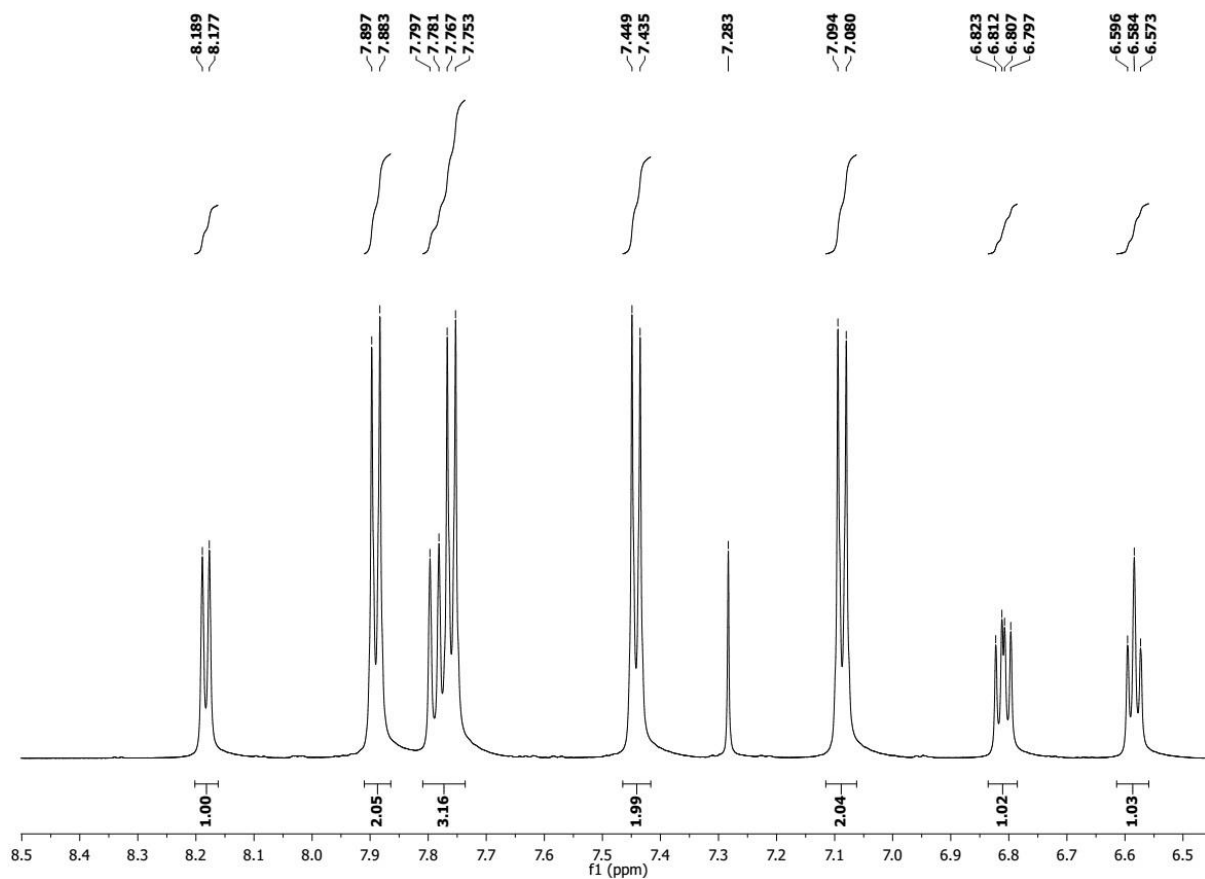

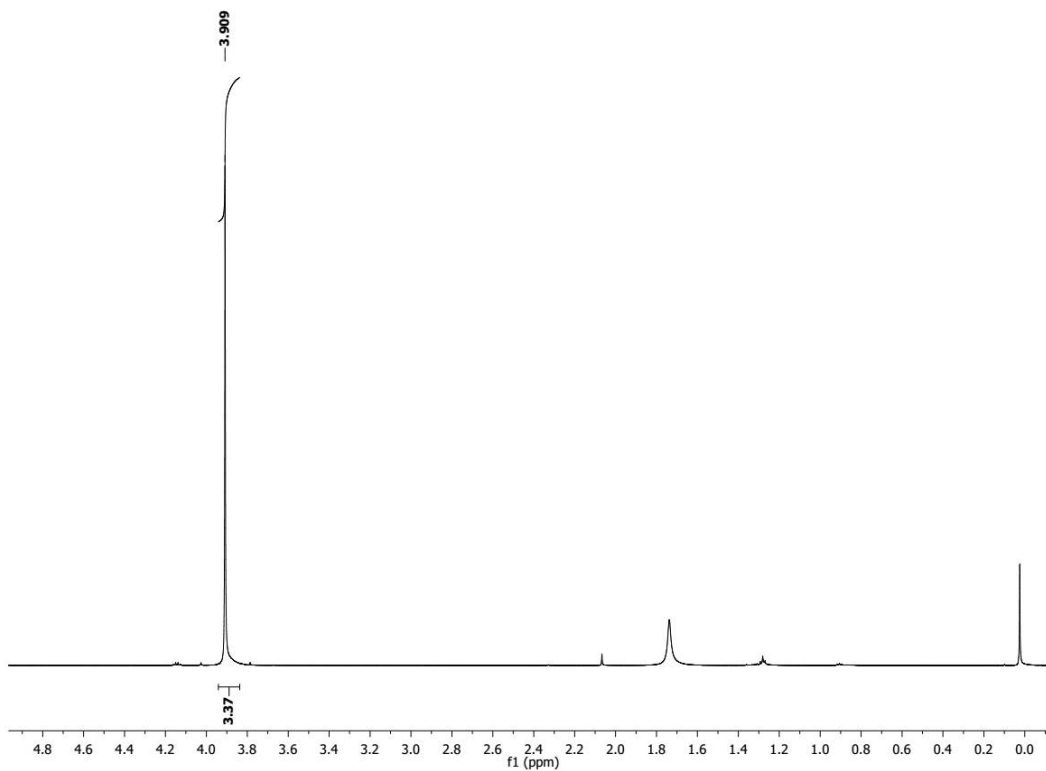

<sup>13</sup>C NMR of Compound 3m

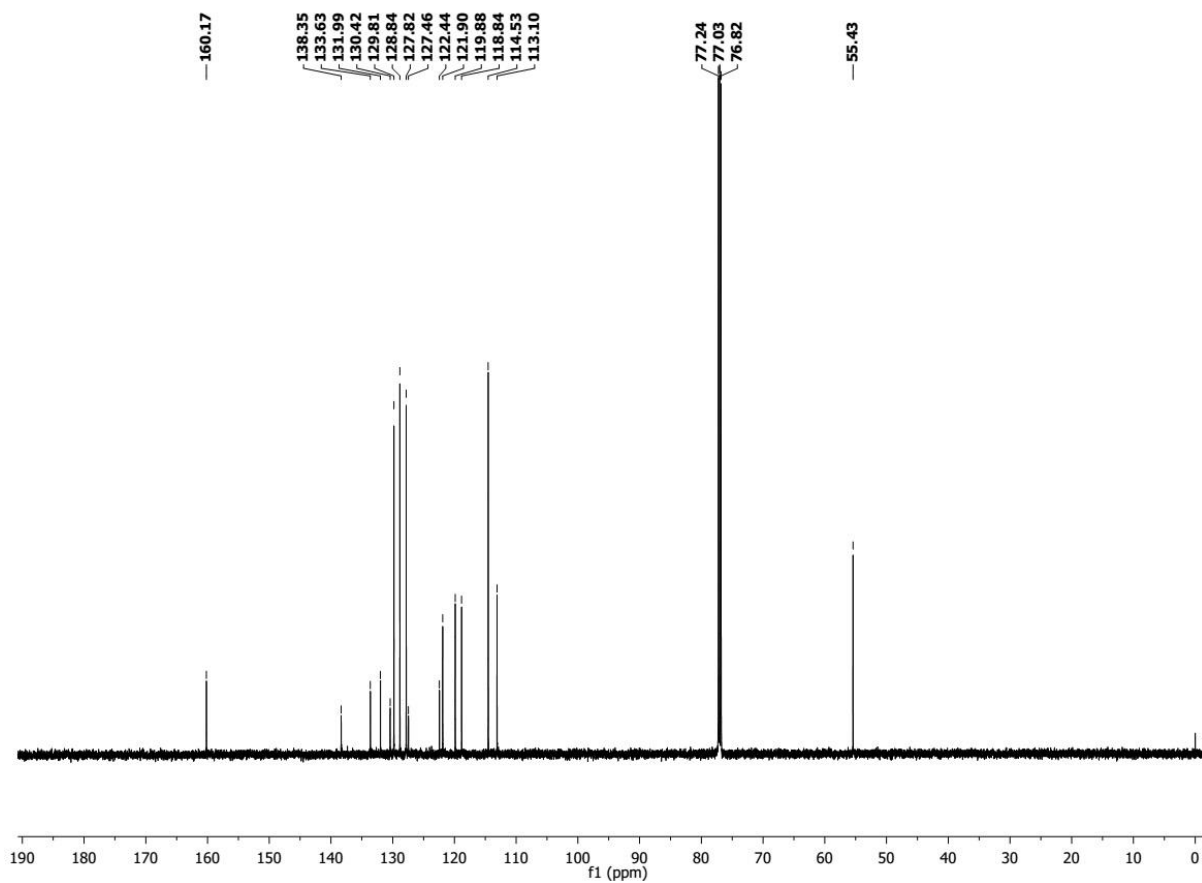



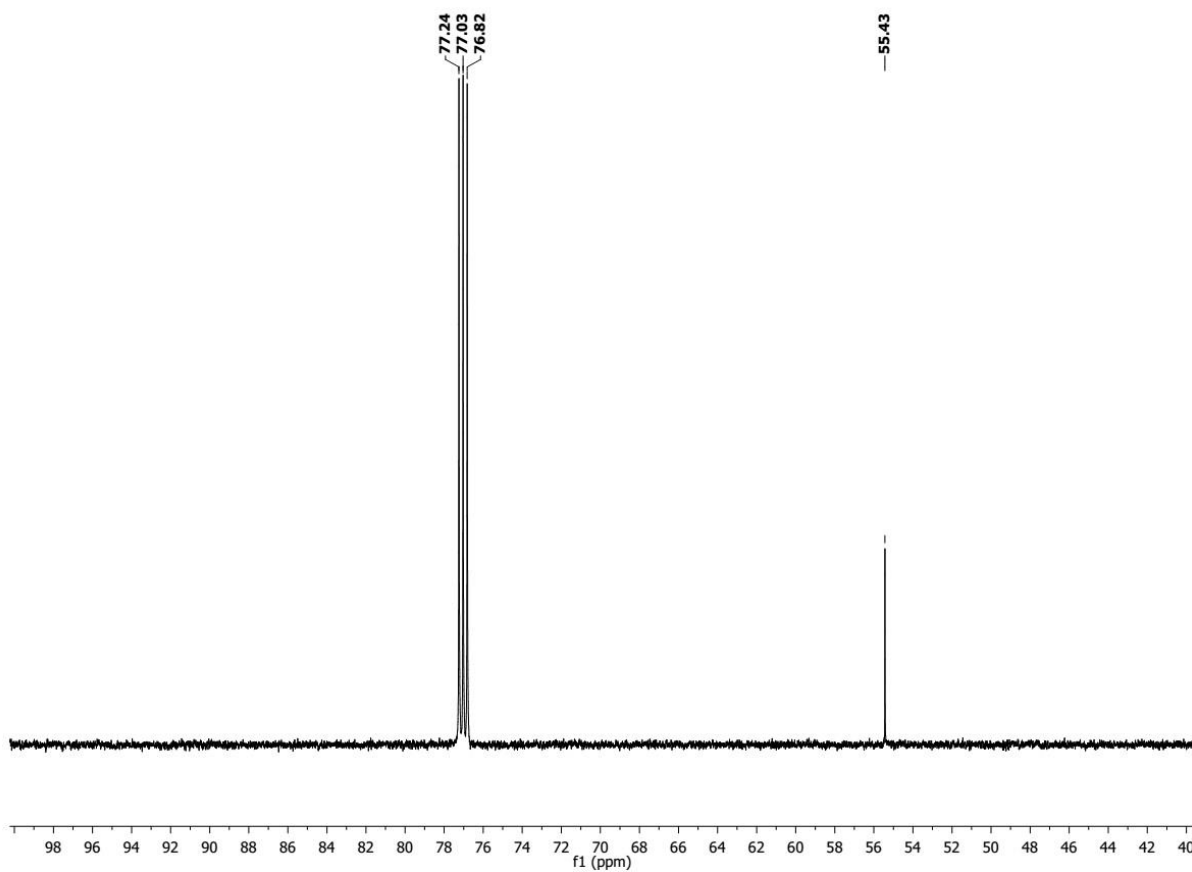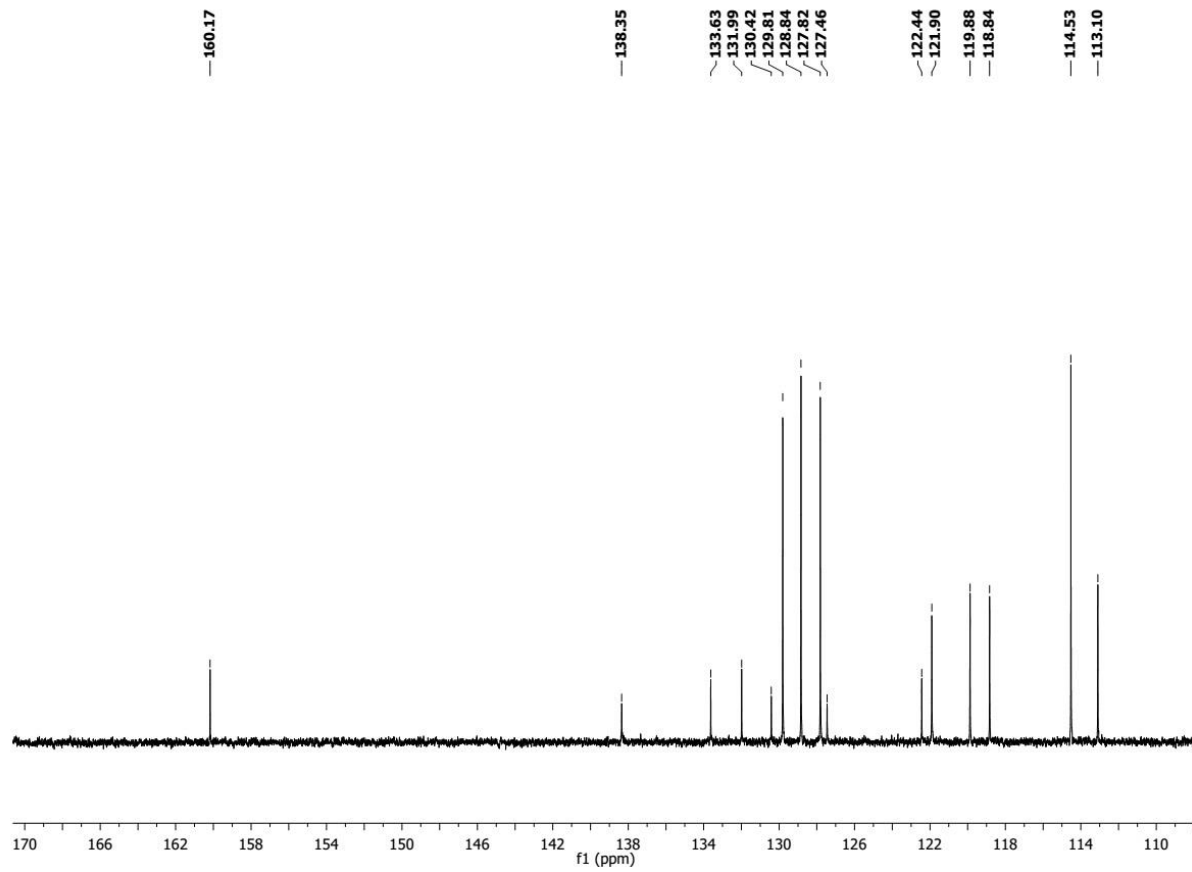

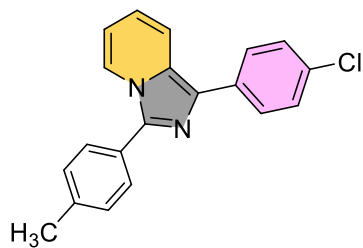

Compound (3n)

LC-MS analysis of Compound 3n

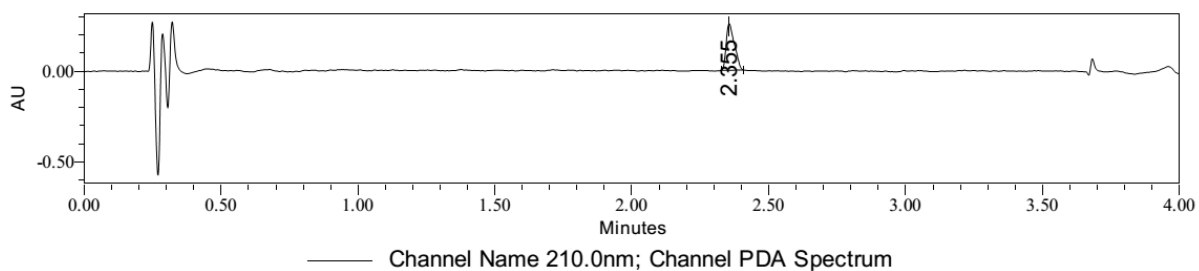

**Peak Results**  
**Channel: PDA Spectrum**

|   | RT    | Base Peak (m/z) | Height | Area   | % Area | Channel      | Channel Name |
|---|-------|-----------------|--------|--------|--------|--------------|--------------|
| 1 | 2.355 |                 | 257651 | 531715 | 100.00 | PDA Spectrum | 210.0nm      |

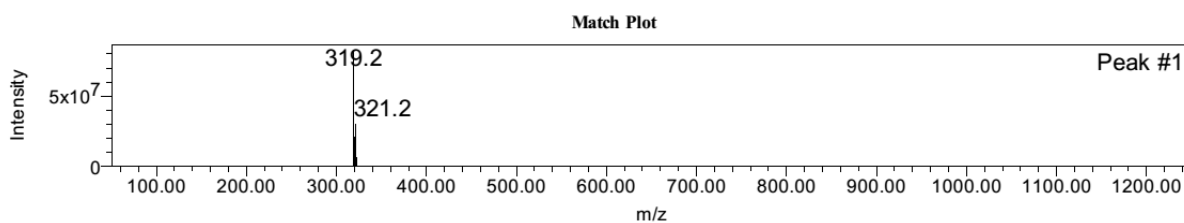

Base Peak 319.20 Channel Description 1: QDa Positive(+) Scan (60.00-1250.00)Da, Centroid, CV=10 - AVG (0.2:2.2;2.8:3.9) x 20.000 Th: 0.001 Retention Time 2.382

<sup>1</sup>H NMR of Compound 3n

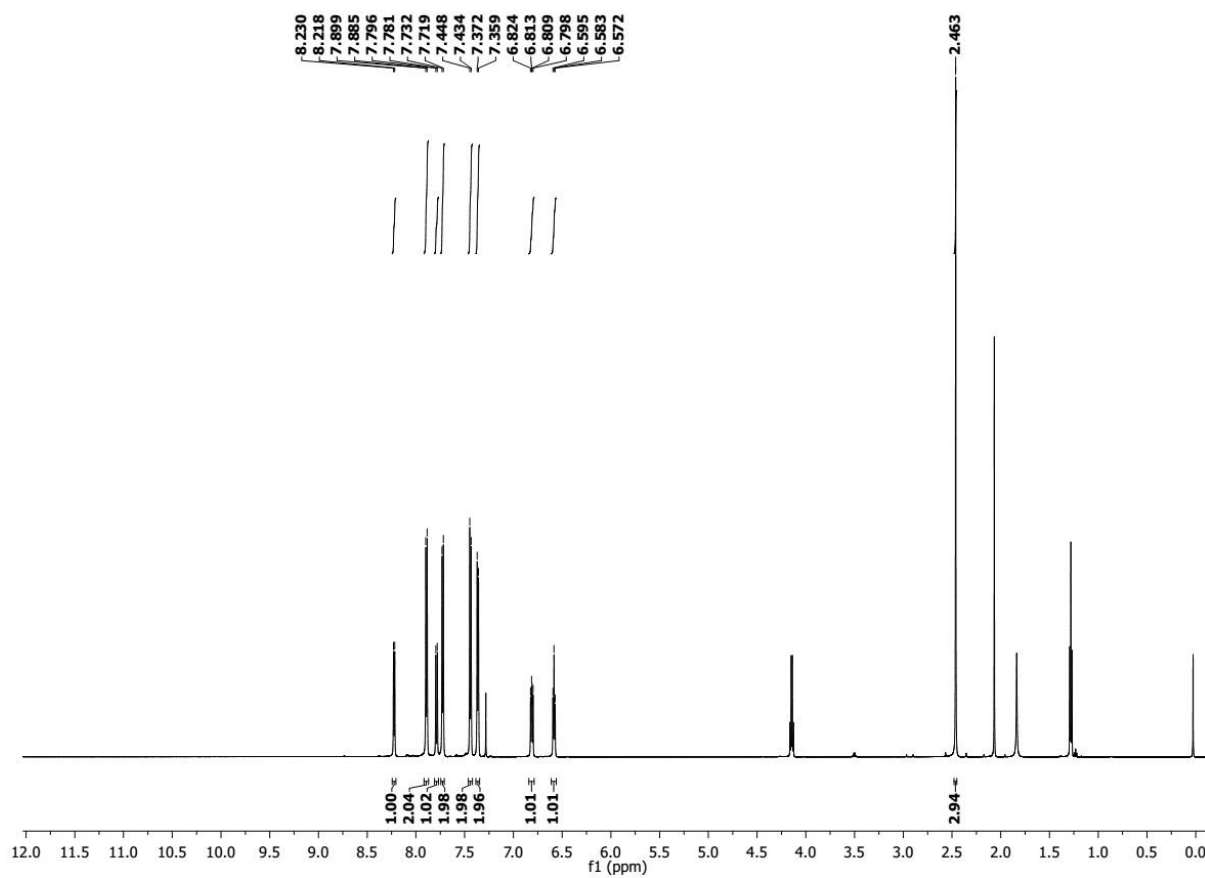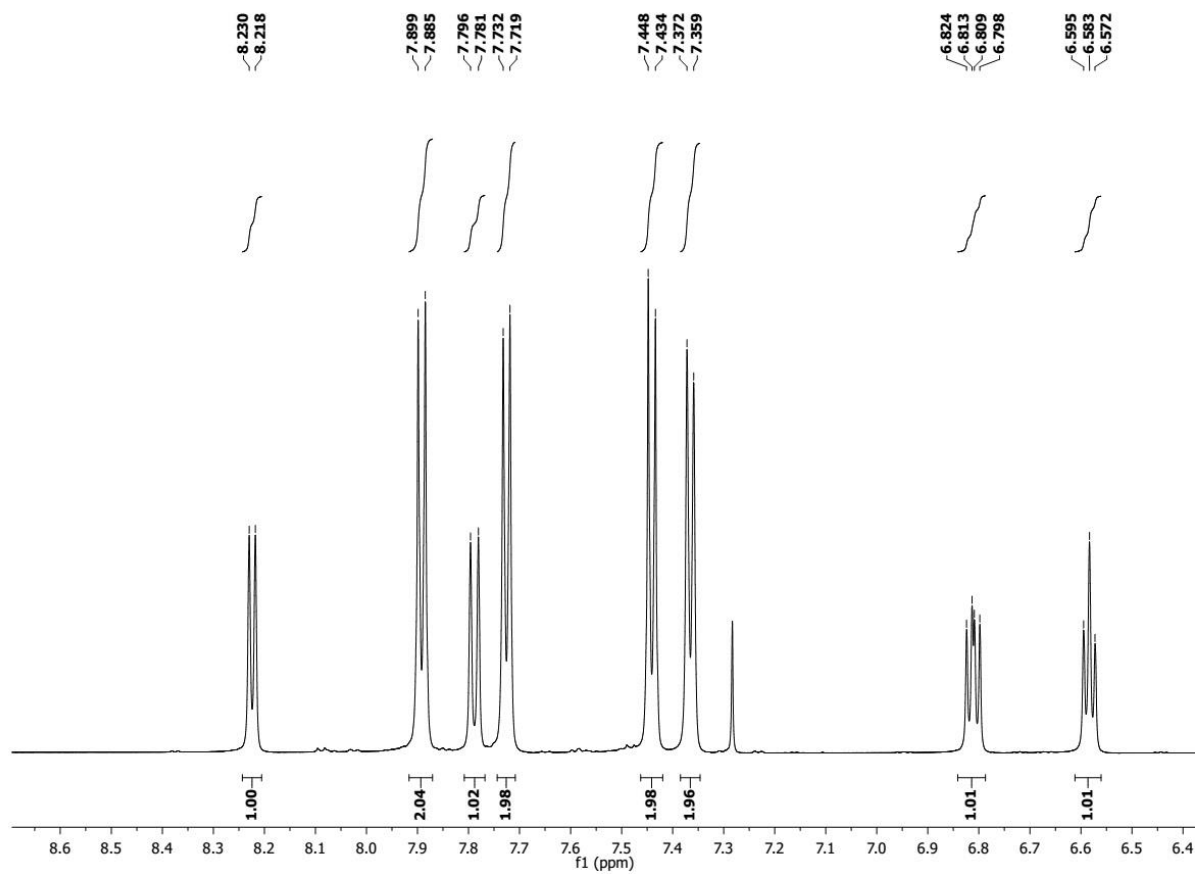

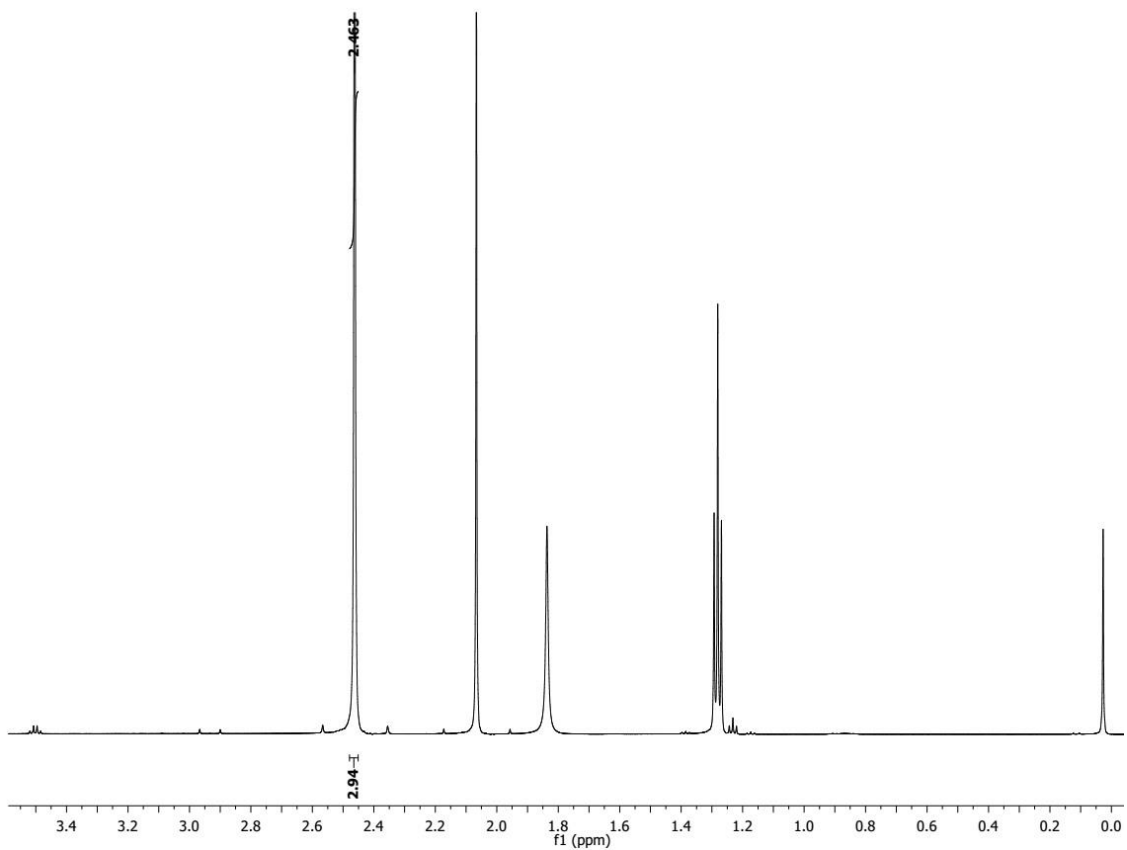

<sup>13</sup>C NMR of Compound 3n

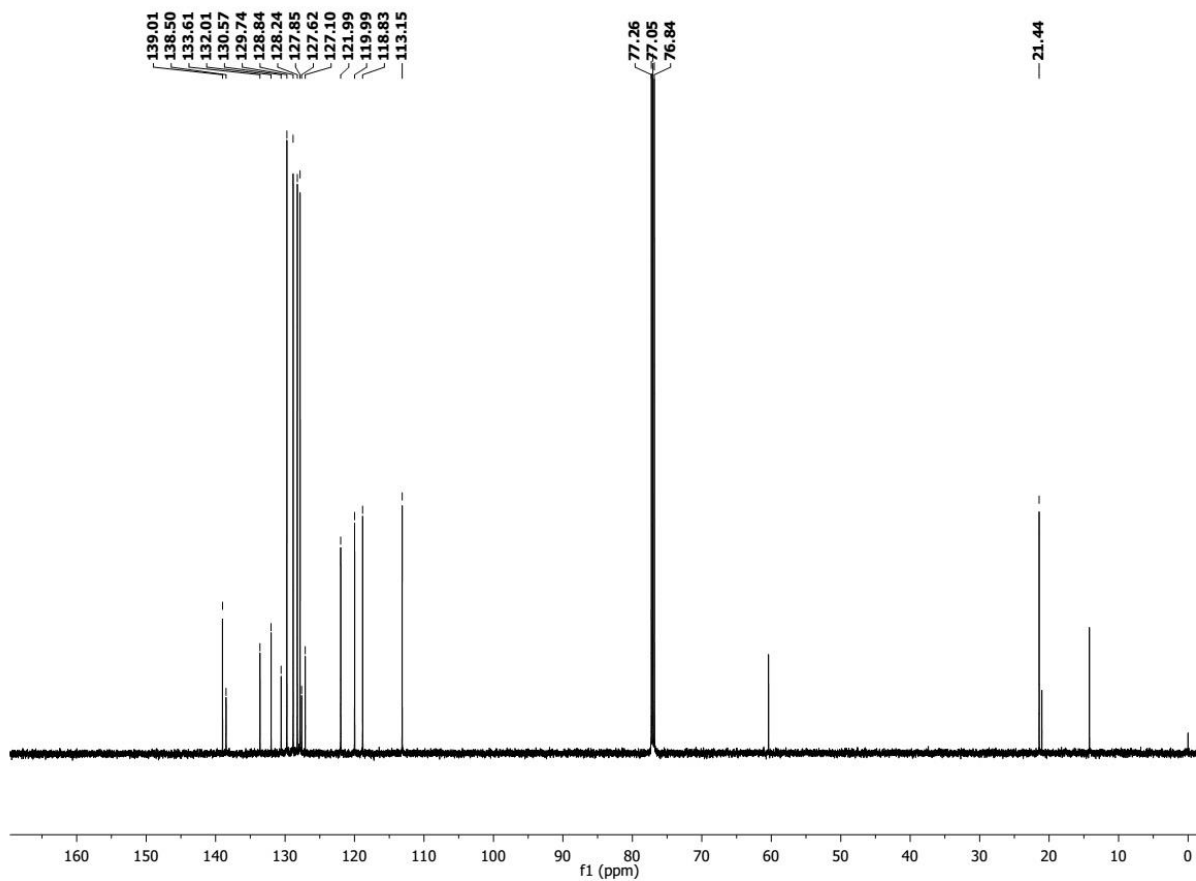

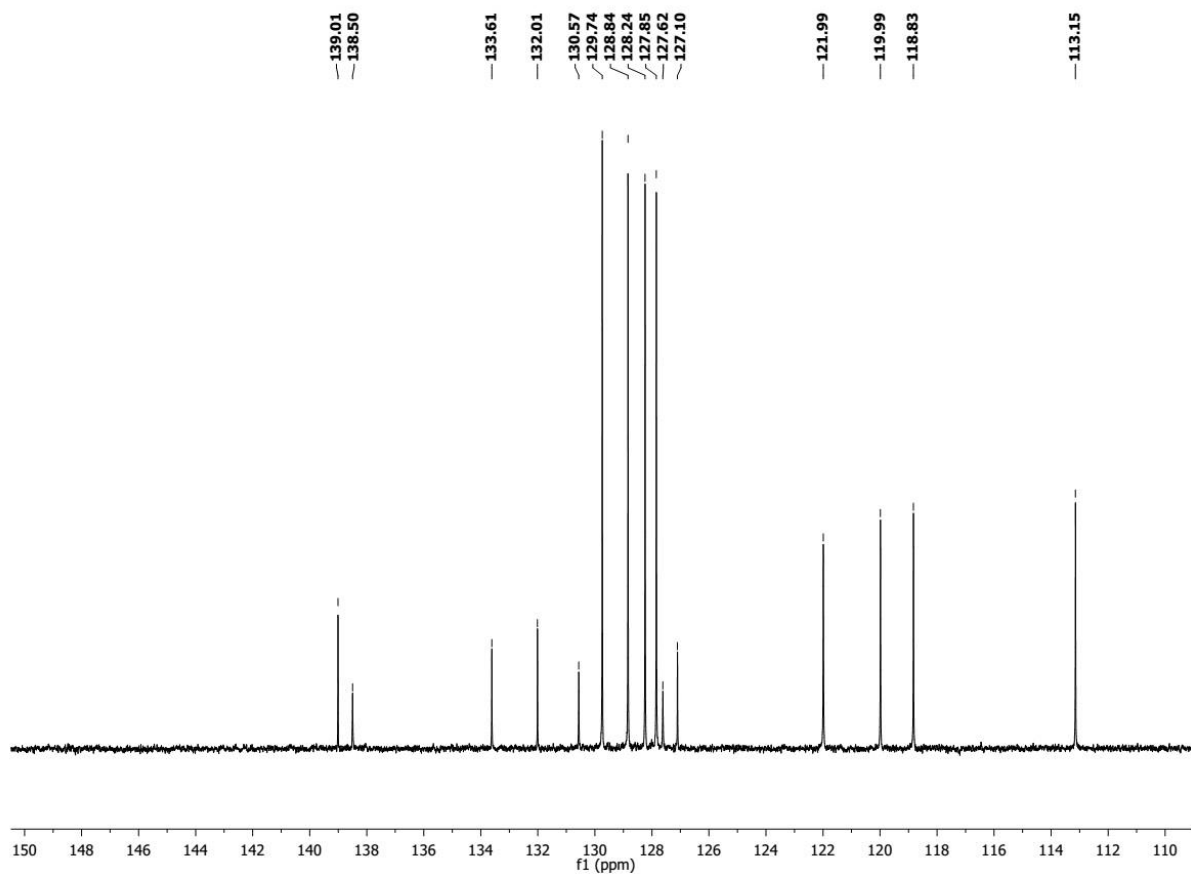

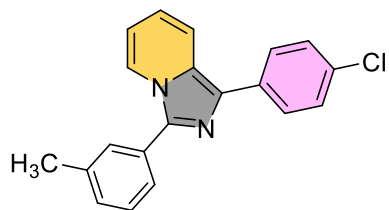

Compound (30)

LC-MS of Compound 30

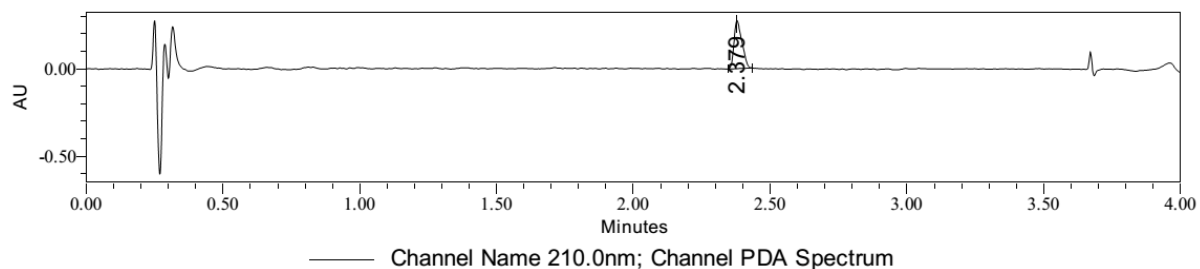

**Peak Results**  
**Channel: PDA Spectrum**

|   | RT    | Base Peak (m/z) | Height | Area   | % Area | Channel      | Channel Name |
|---|-------|-----------------|--------|--------|--------|--------------|--------------|
| 1 | 2.379 |                 | 275987 | 550076 | 100.00 | PDA Spectrum | 210.0nm      |

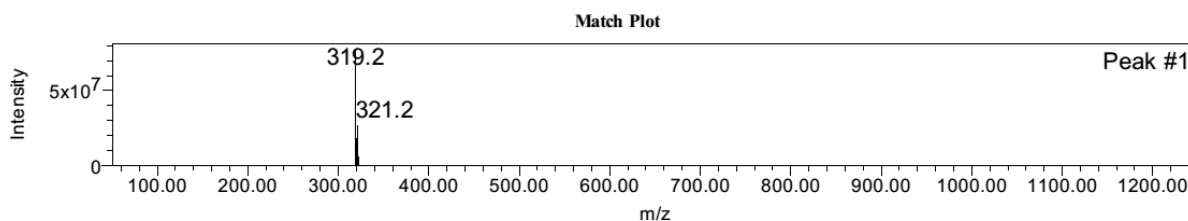

Base Peak 319.20 Channel Description 1: QDa Positive(+) Scan (60.00-1250.00)Da, Centroid, CV=10 - AVG (1.0:2.2;2.7:3.9;0.1:1.5) x 20.000 Th: 0.010 Retention Time 2.407

<sup>1</sup>H NMR of Compound 30

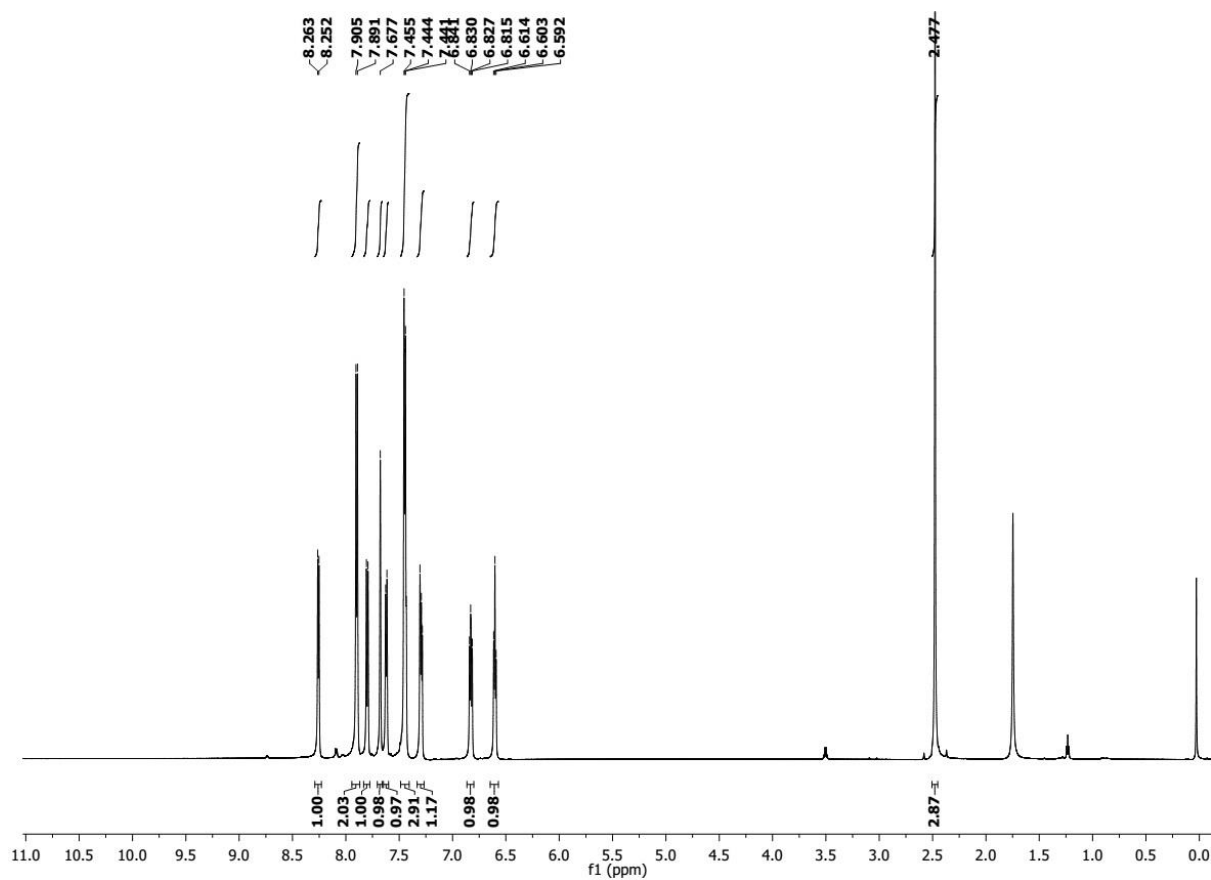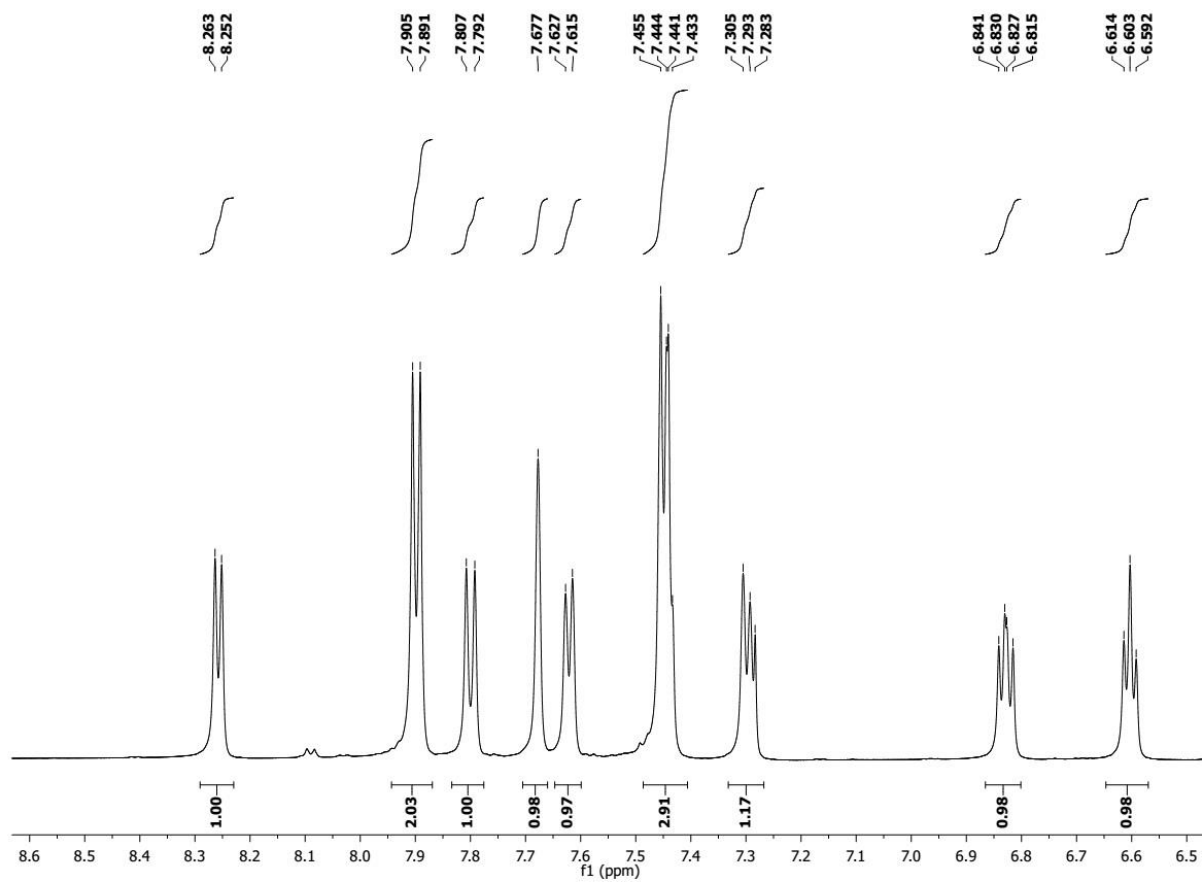

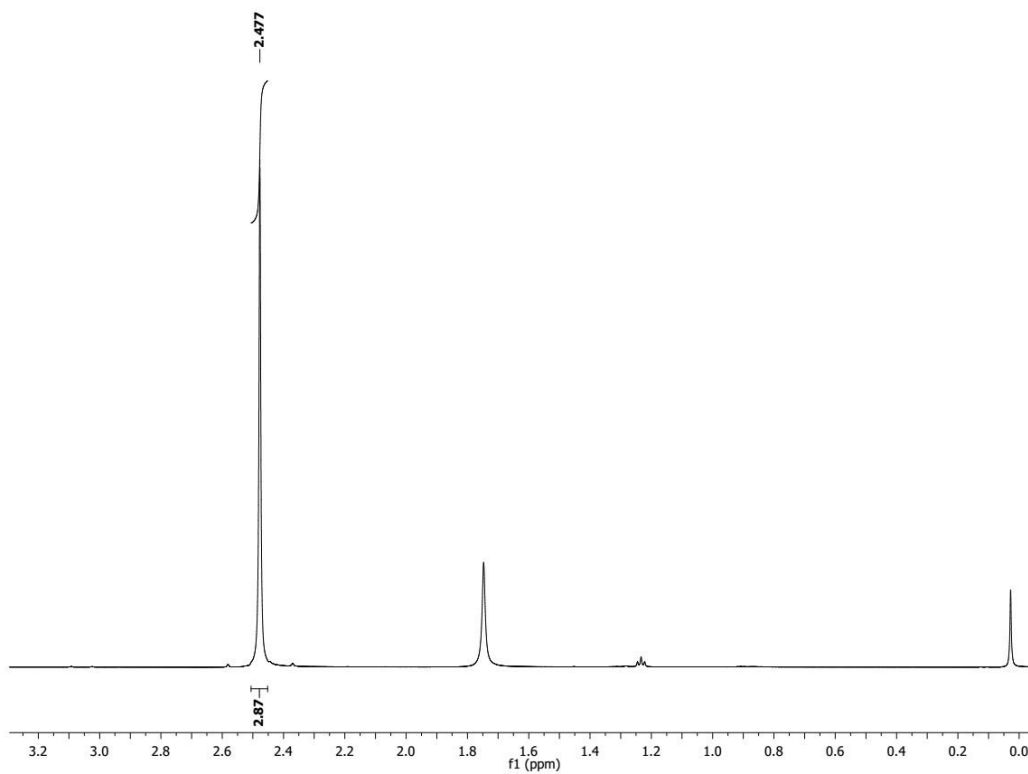

<sup>13</sup>C NMR of Compound 30

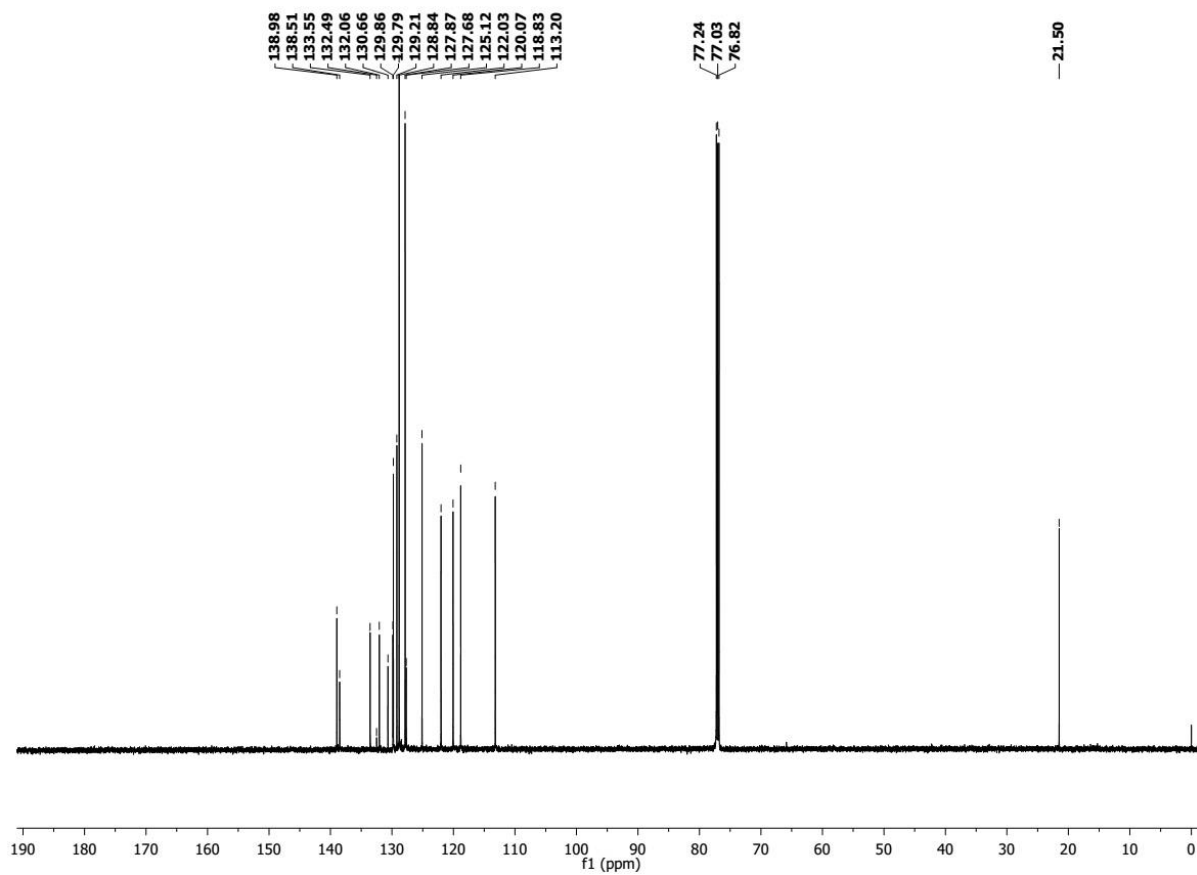



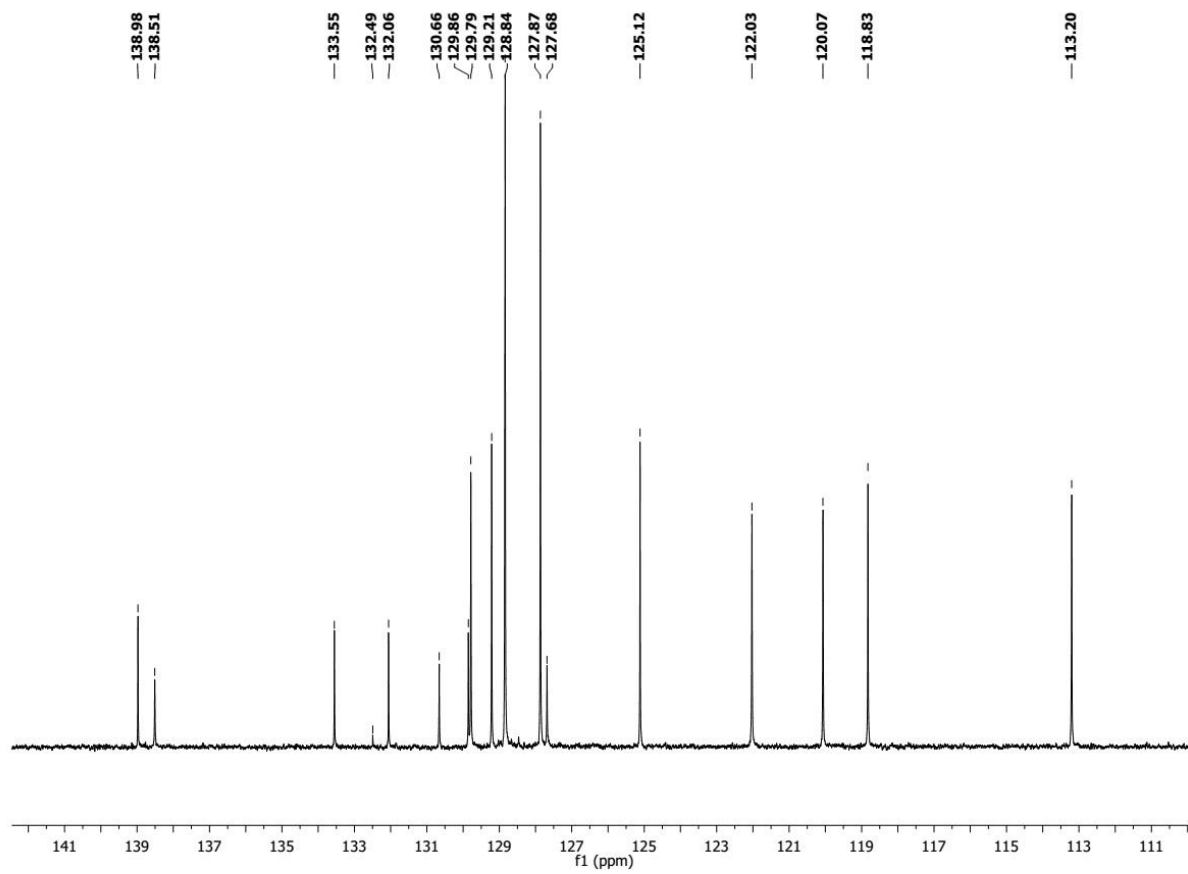

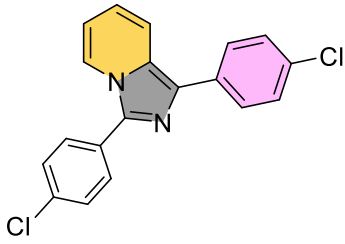

Compound (3p)

LC-MS of Compound 3p

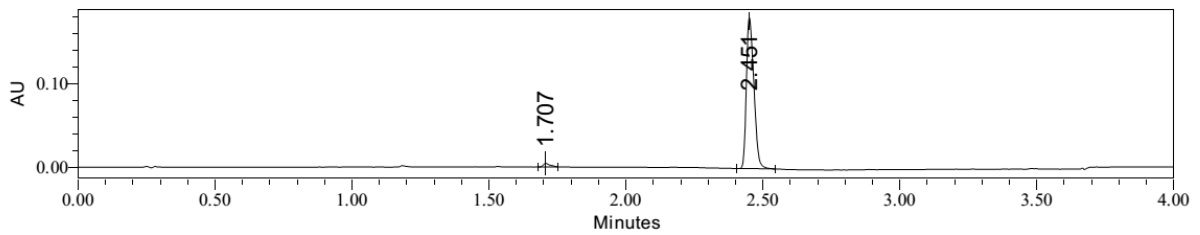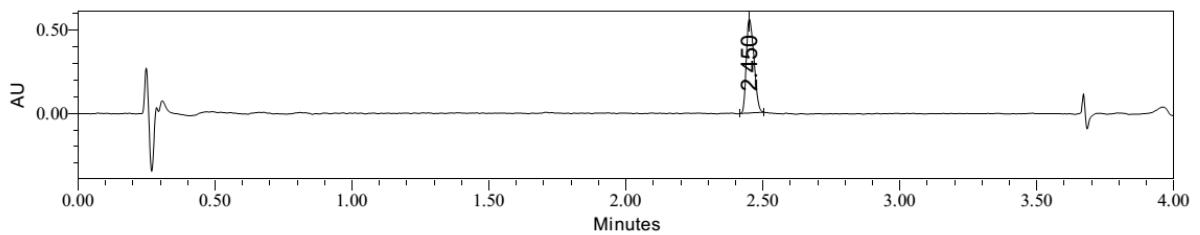

Channel Name 210.0nm; Channel PDA Spectrum

**Peak Results**  
**Channel: PDA Spectrum**

|   | RT    | Base Peak (m/z) | Height | Area    | % Area | Channel      | Channel Name |
|---|-------|-----------------|--------|---------|--------|--------------|--------------|
| 1 | 1.707 |                 | 4294   | 7433    | 2.10   | PDA Spectrum | 254.0nm      |
| 2 | 2.450 |                 | 564323 | 1093627 | 100.00 | PDA Spectrum | 210.0nm      |
| 3 | 2.451 |                 | 181645 | 345792  | 97.90  | PDA Spectrum | 254.0nm      |

Match Plot

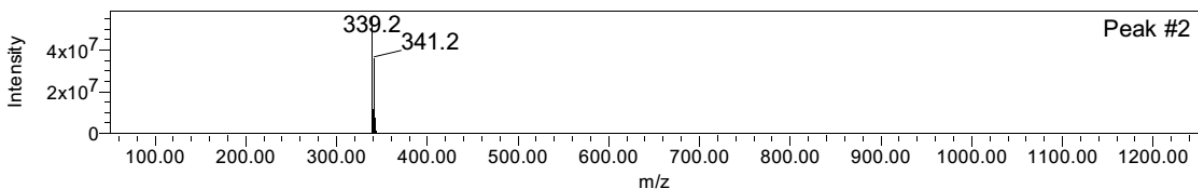

Base Peak 339.18 Channel Description 1: QDa Positive(+) Scan (60.00-1250.00)Da, Centroid, CV=10 - AVG (1.8:2.4;0.0:1.6;2.7:3.9) x 20.000 Retention Time 2.479

<sup>1</sup>H NMR of Compound 3p

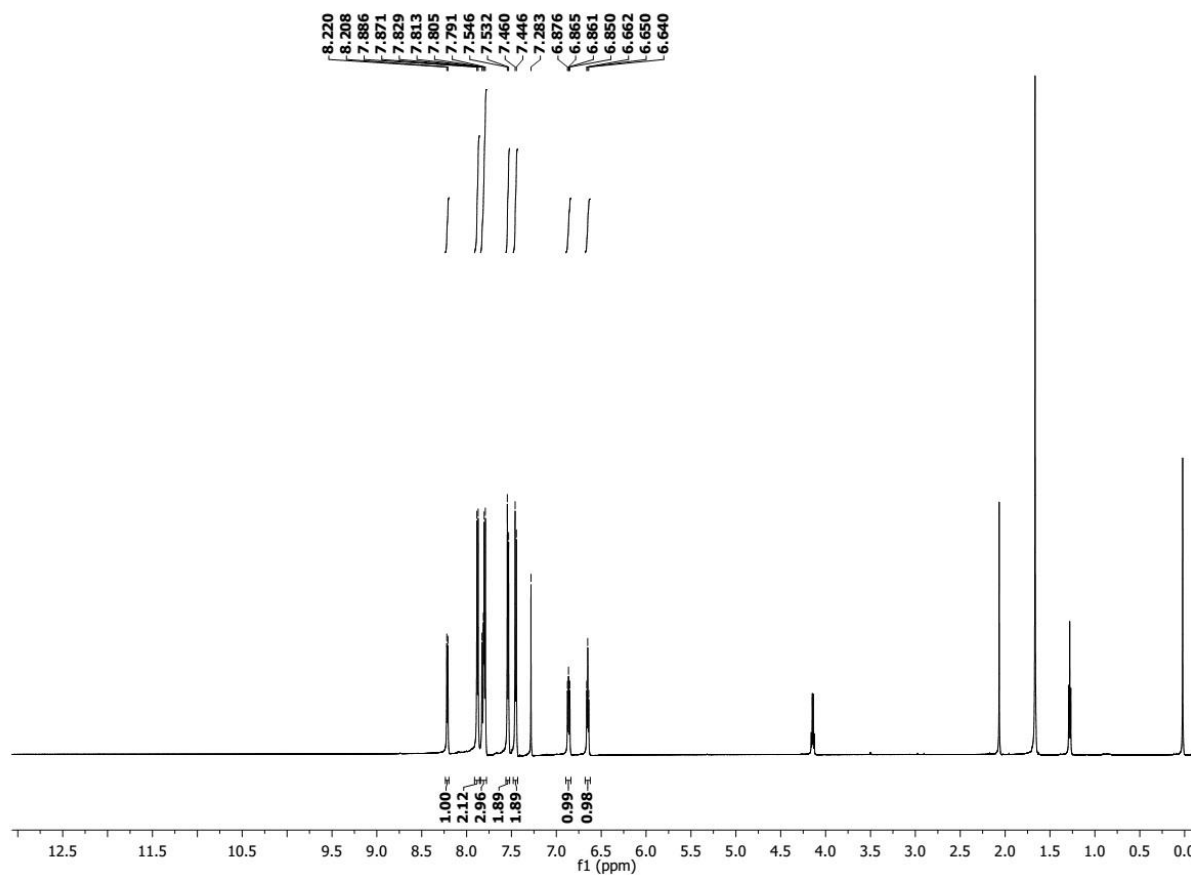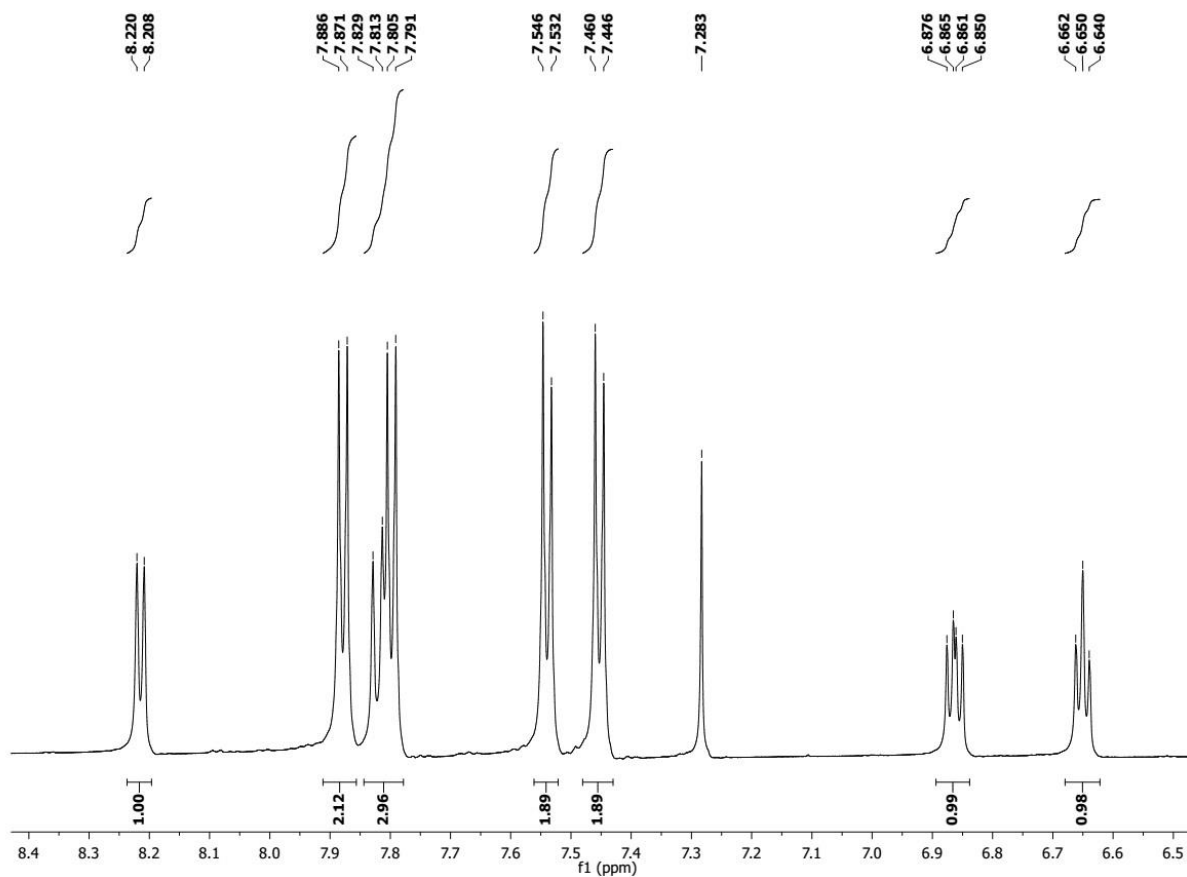

# $^{13}\text{C}$ NMR of Compound 3p

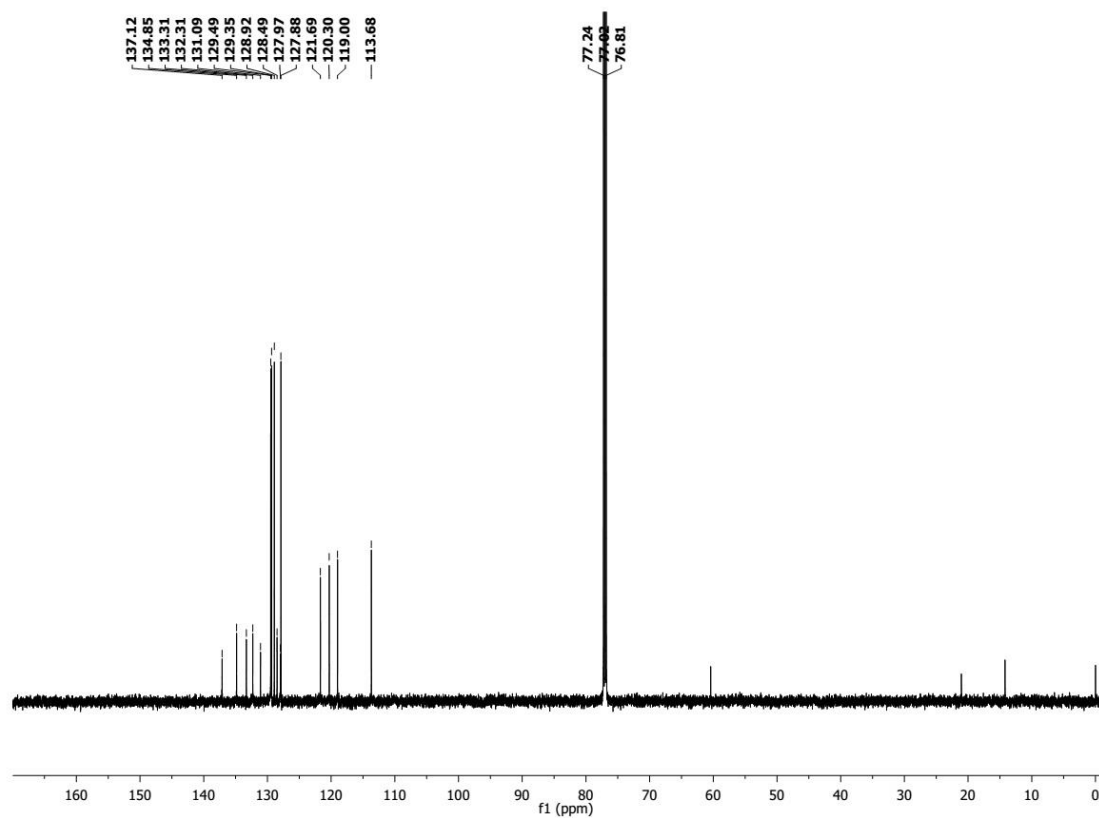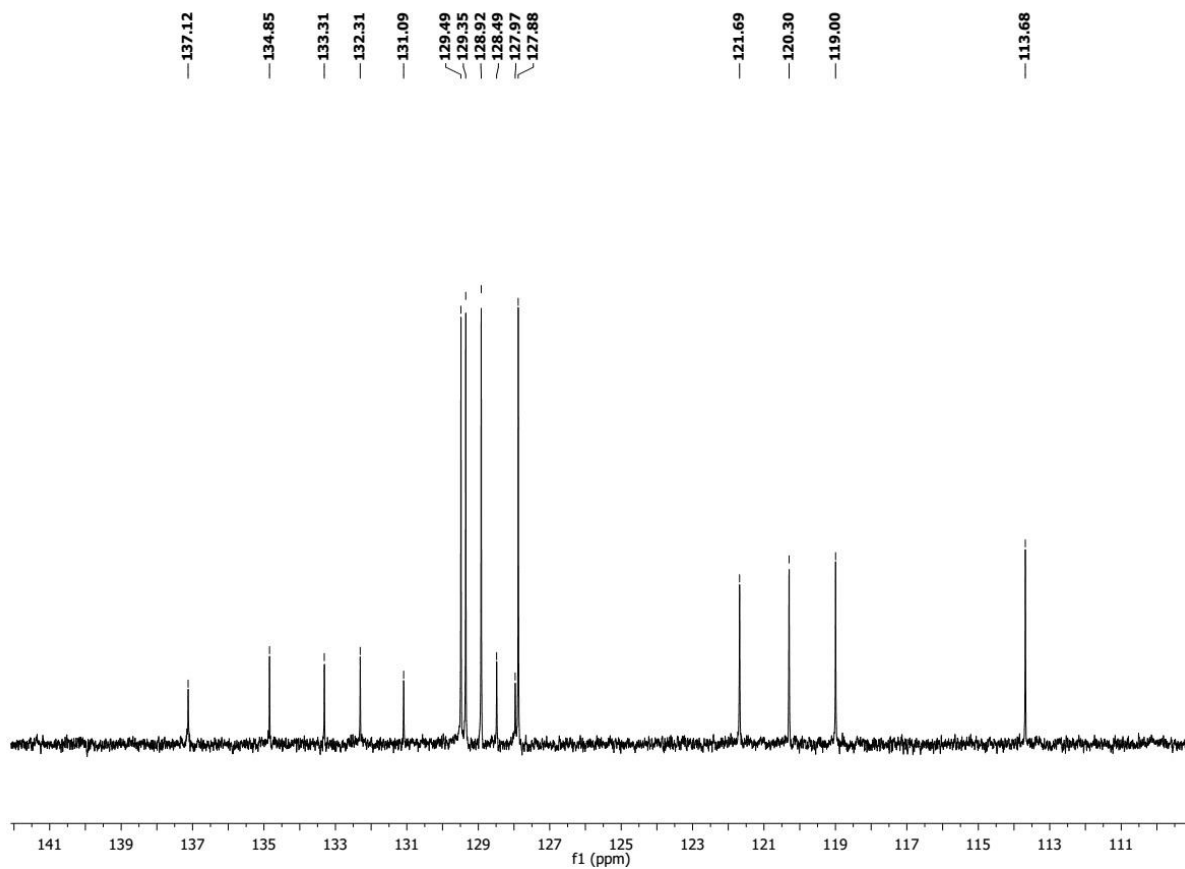

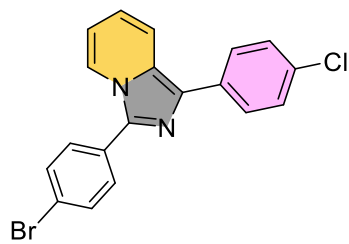

Compound (3q)

$^1\text{H}$  NMR of Compound 3q

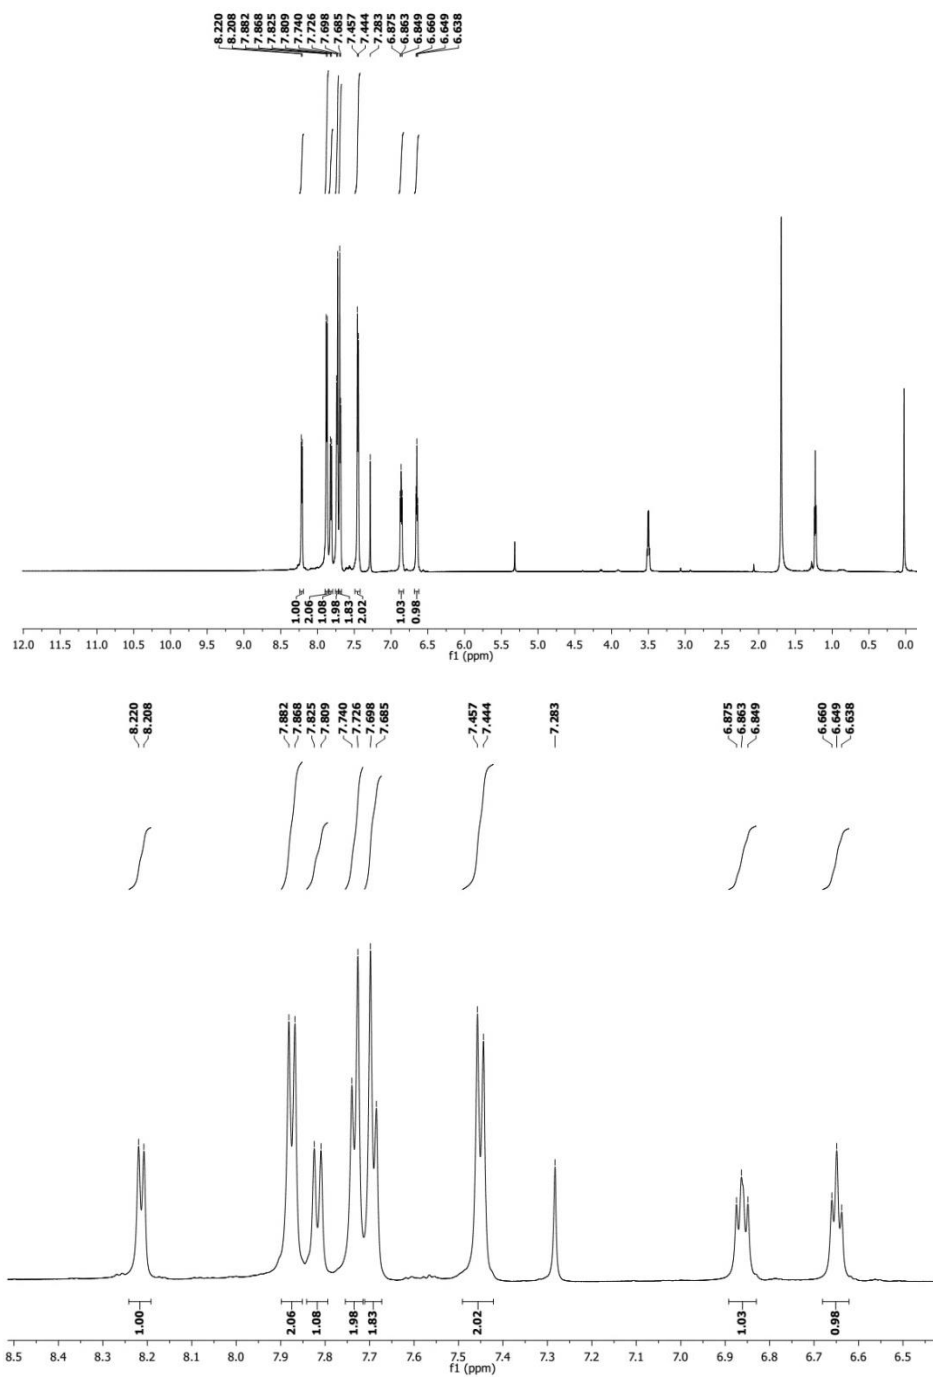

<sup>13</sup>C NMR of Compound 3q

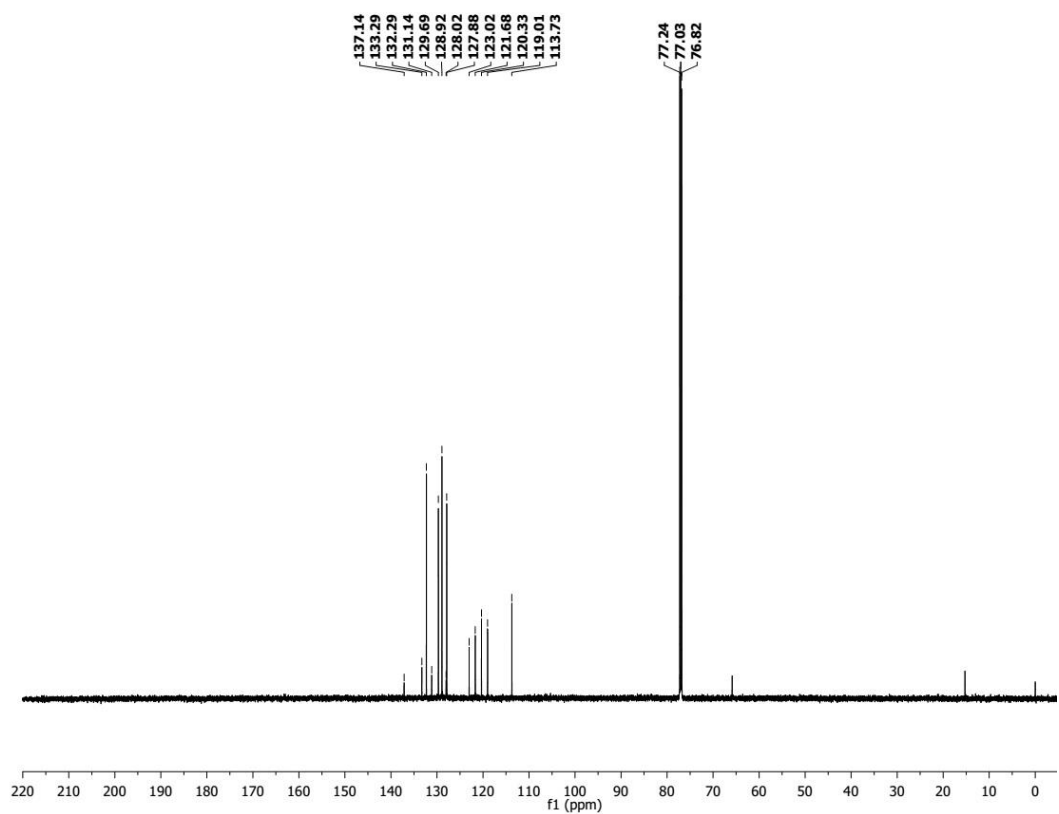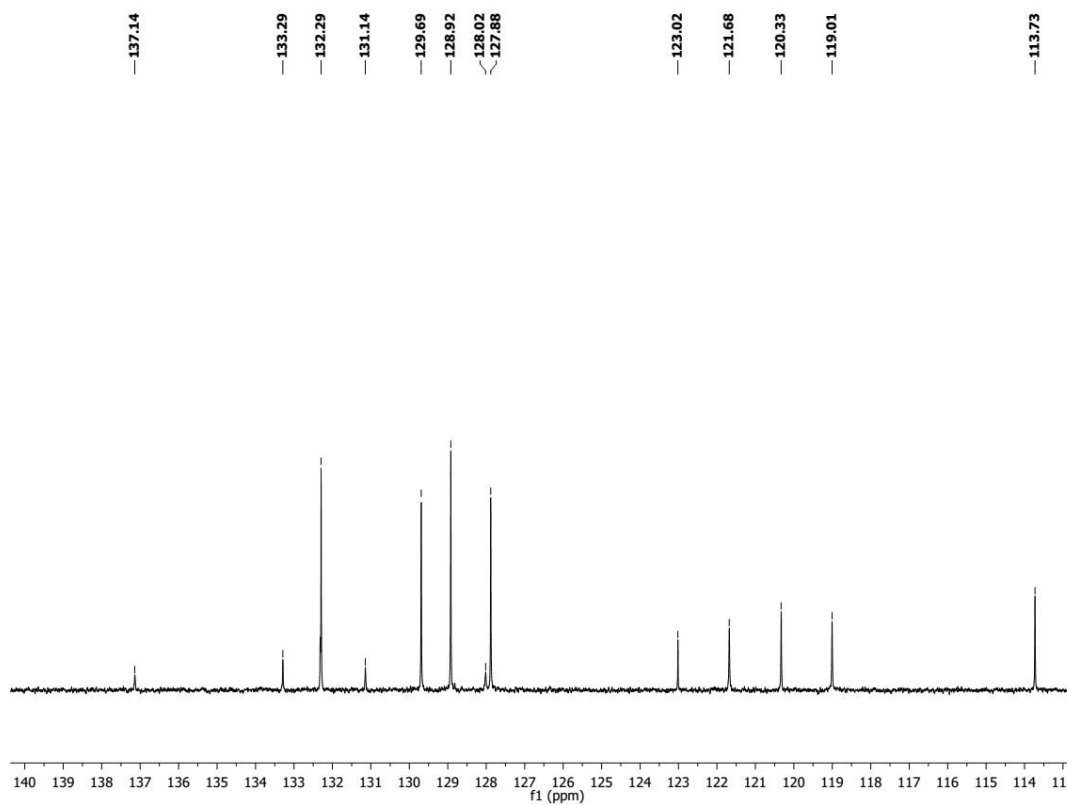

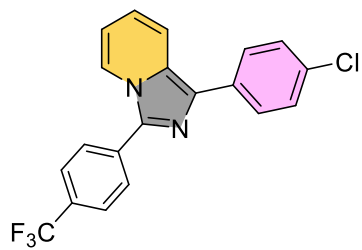

Compound (3r)

$^1\text{H}$  NMR of Compound 3r

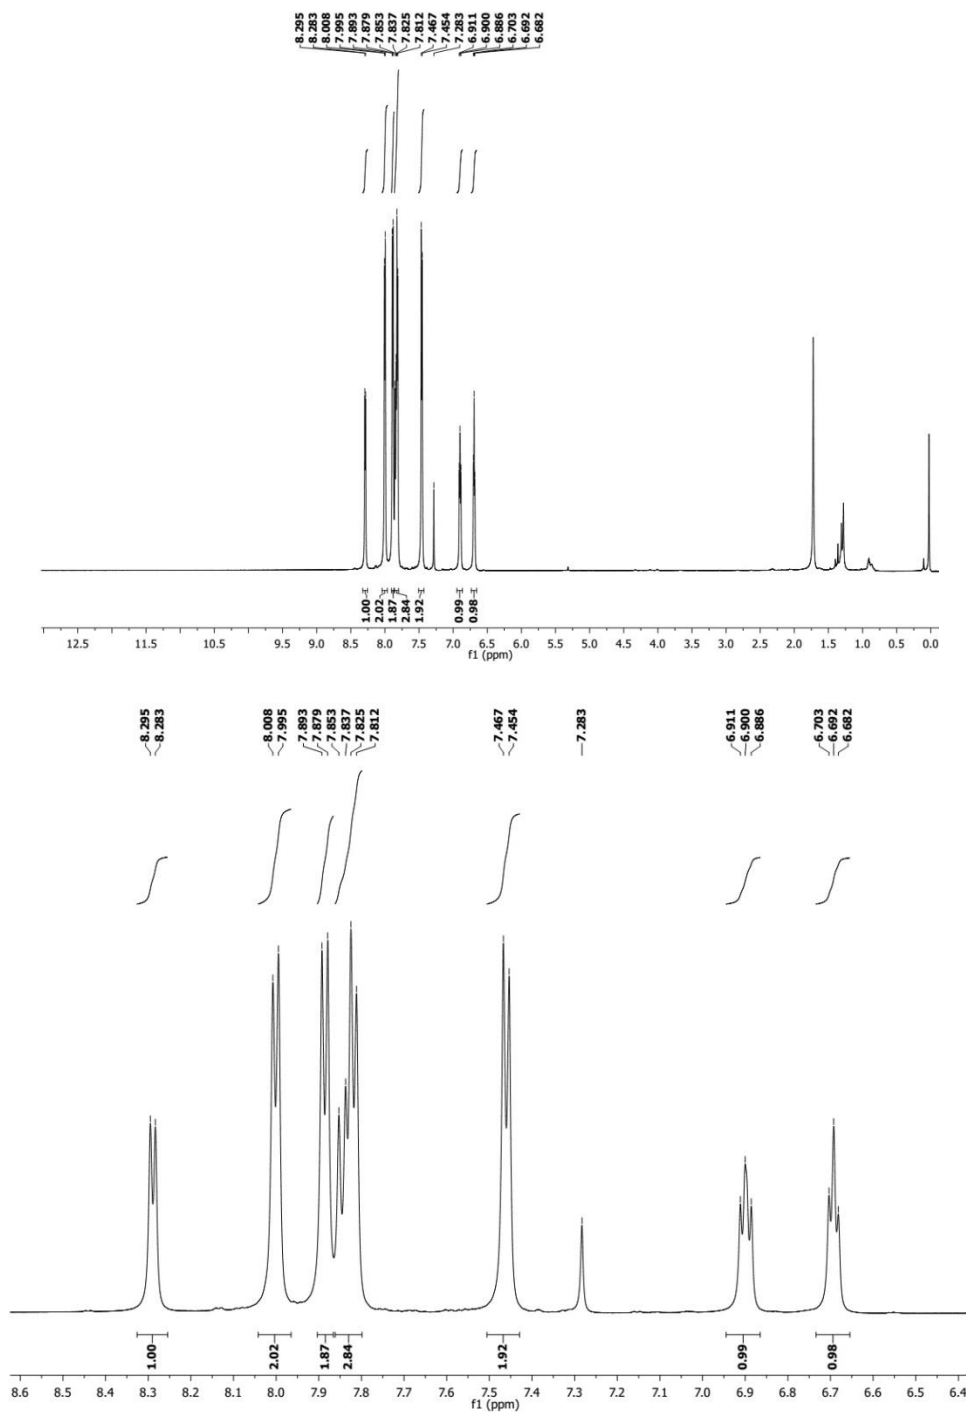

<sup>13</sup>C NMR of Compound 3r

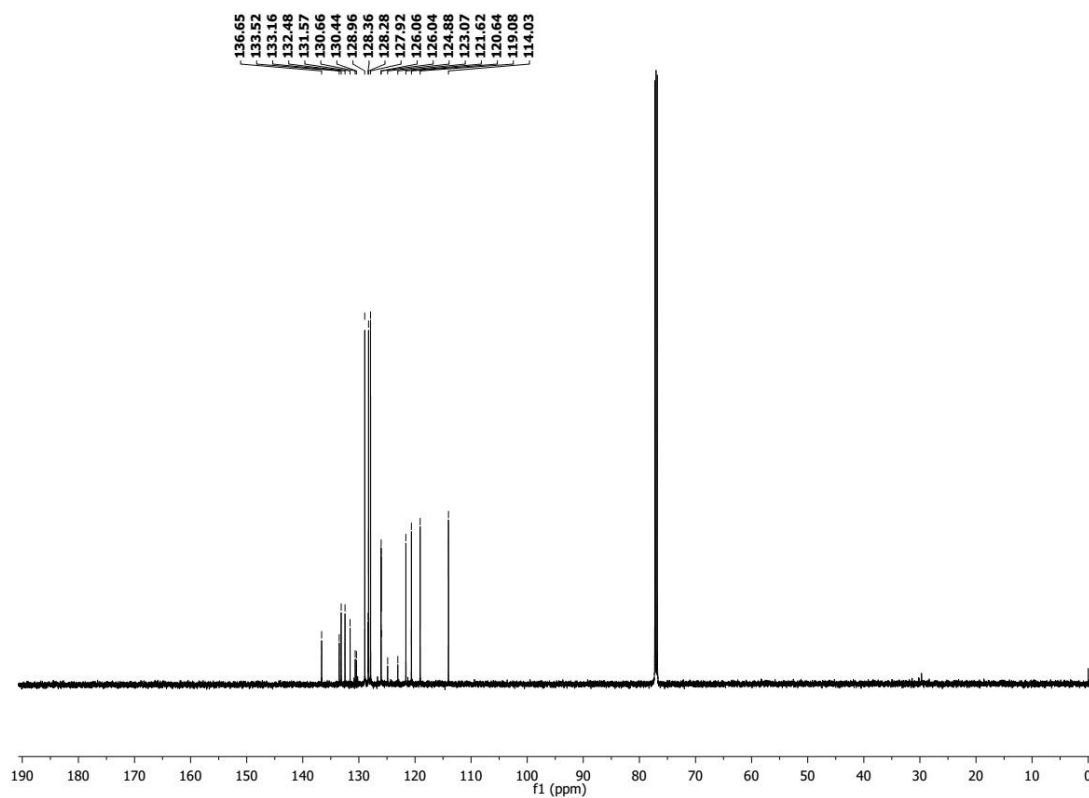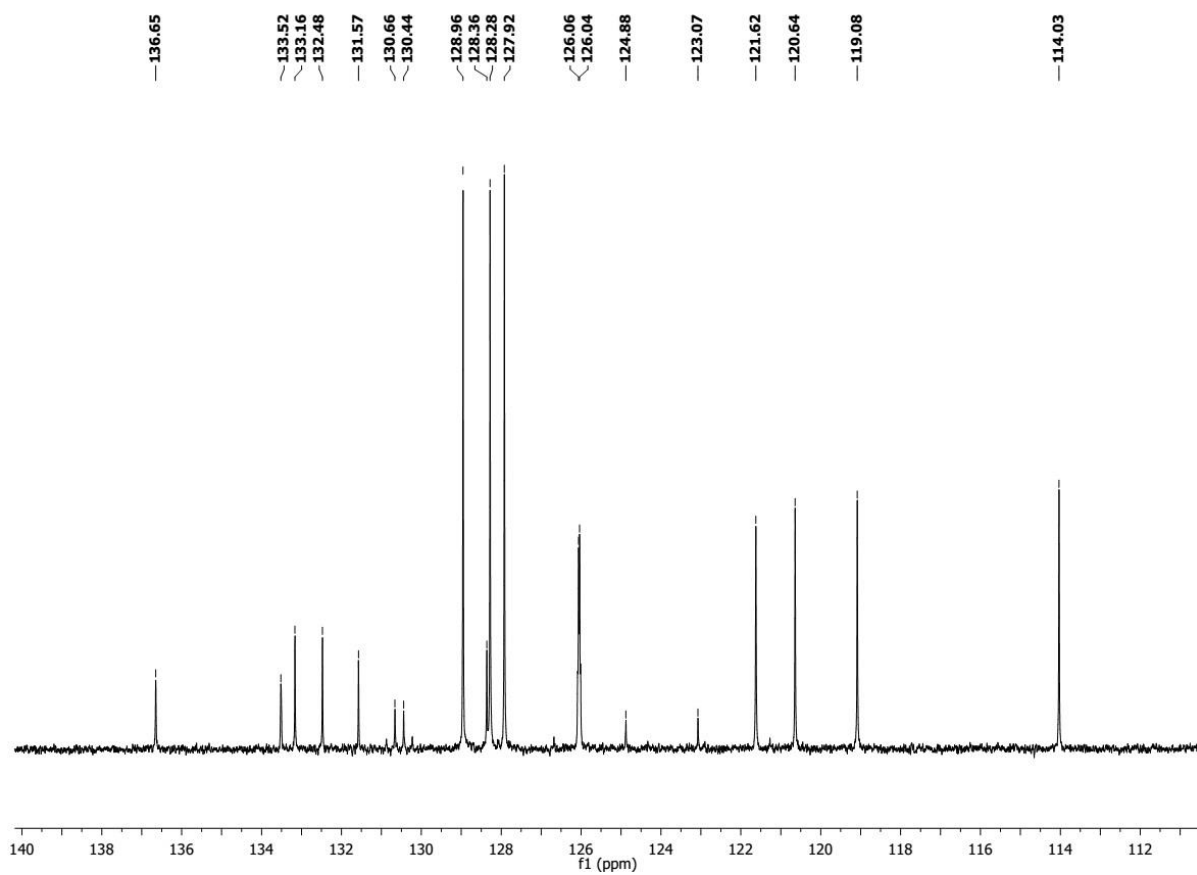



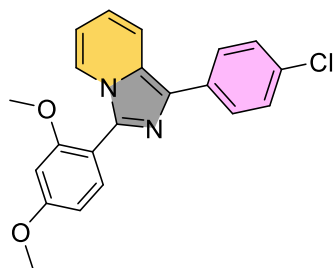

Compound (3s)

$^1\text{H}$  NMR of Compound 3s

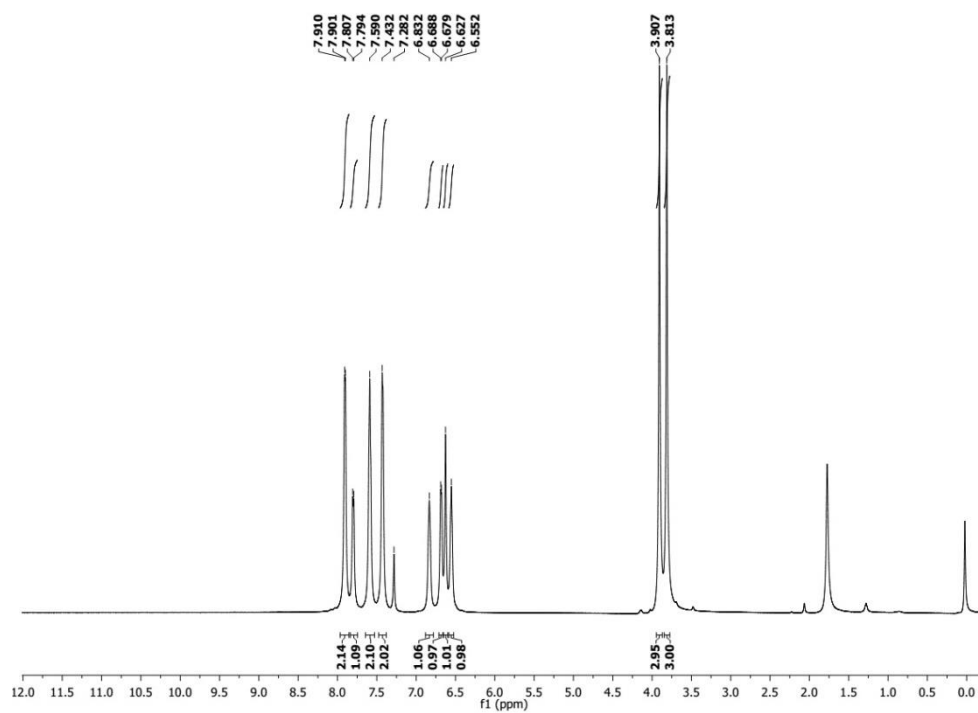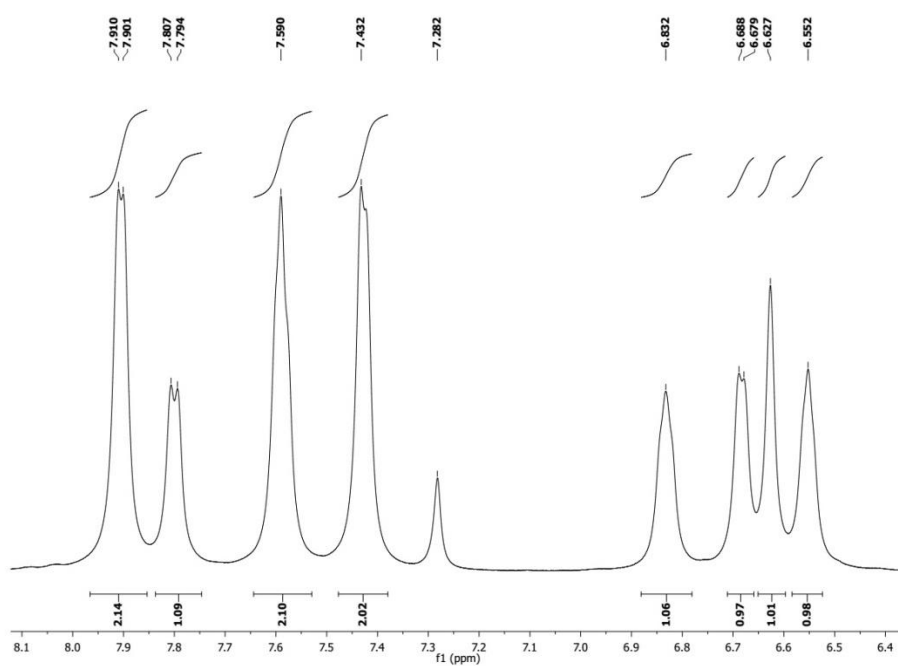

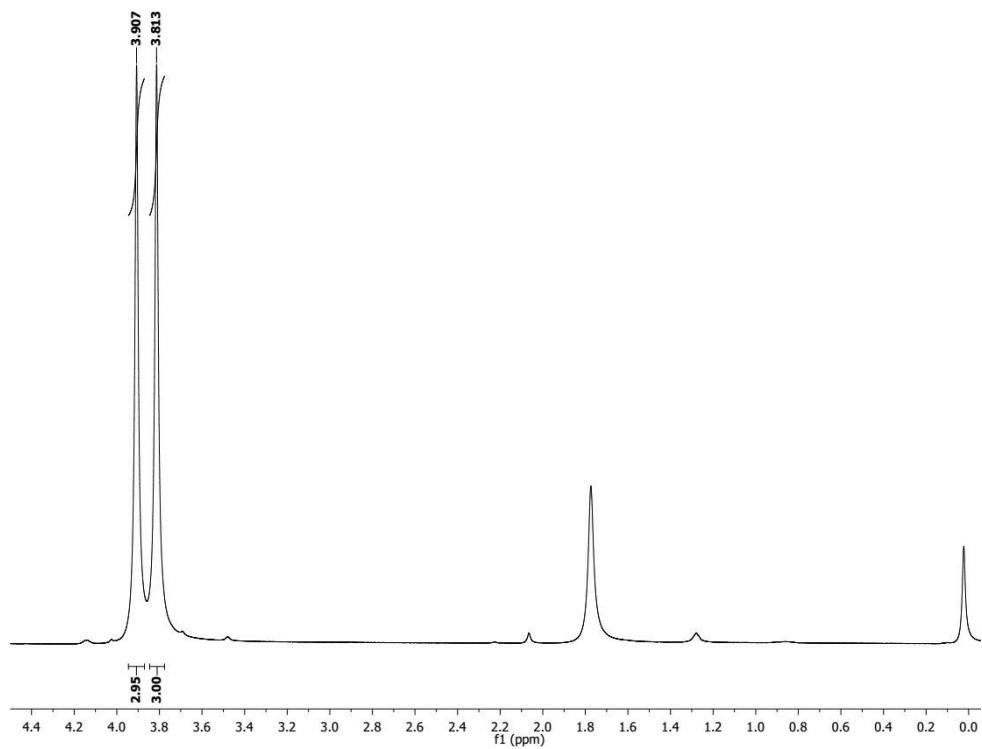

13C NMR of Compound 3s

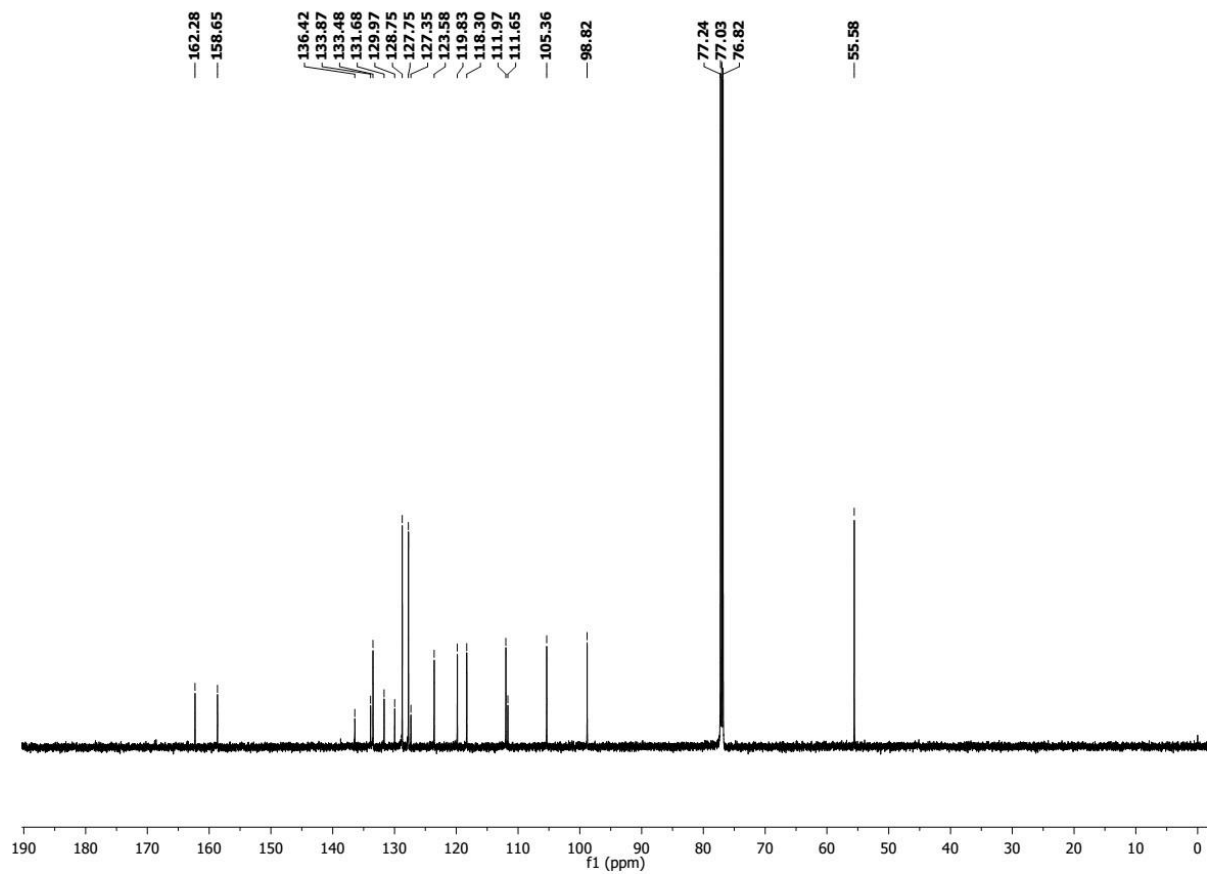

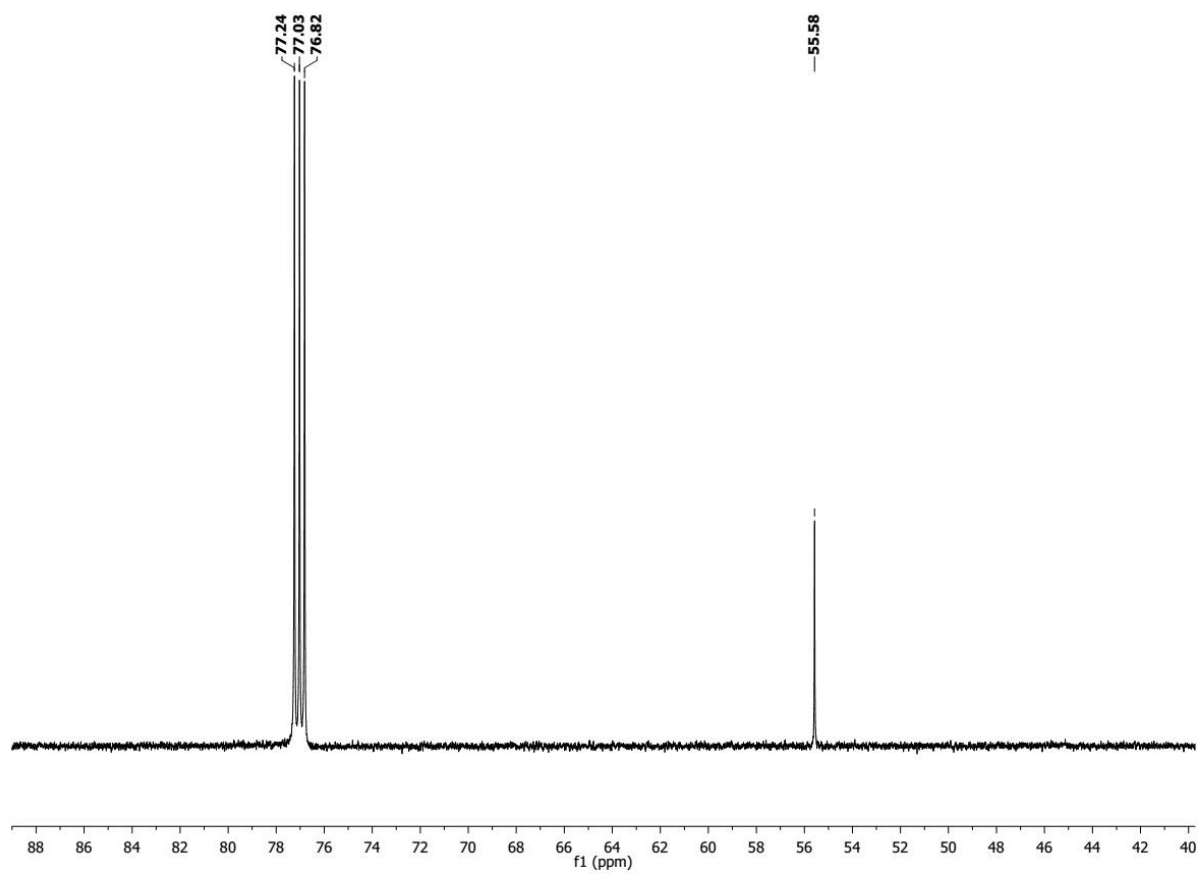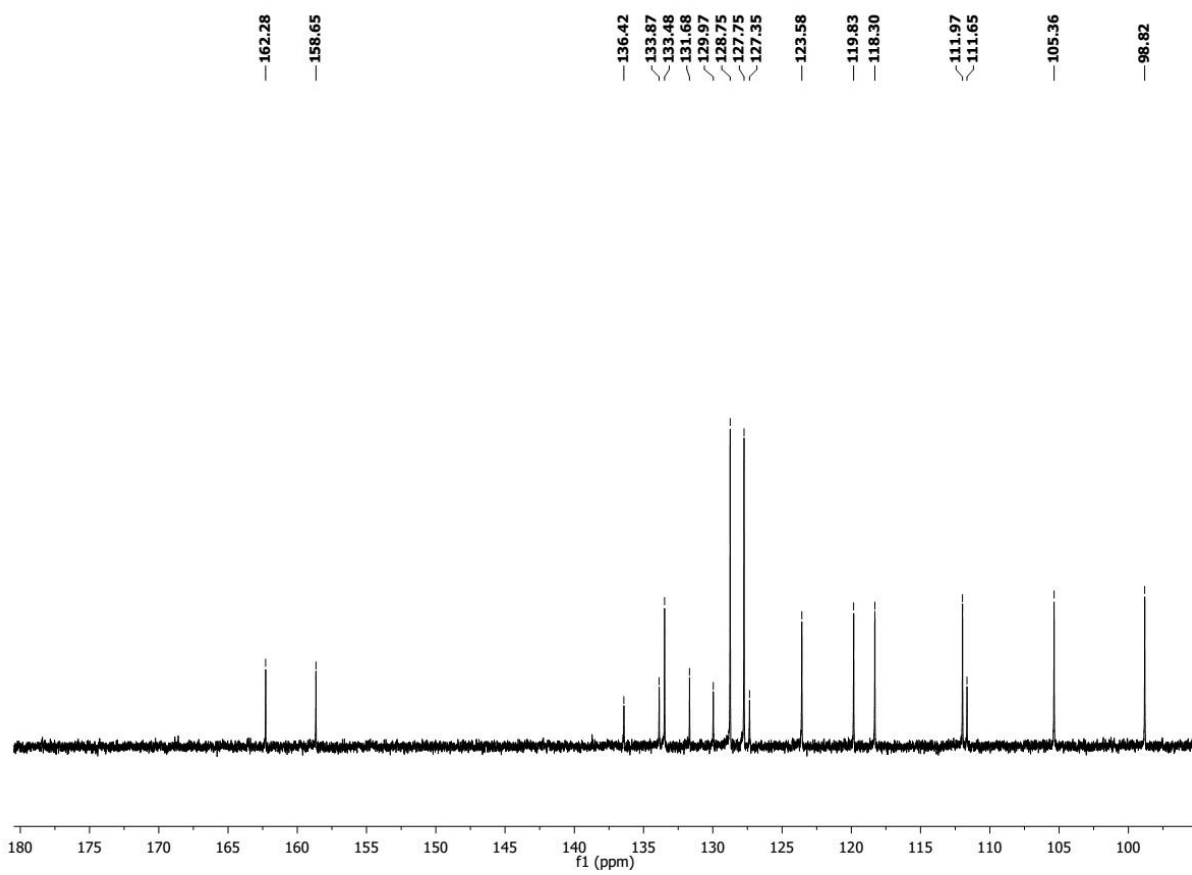

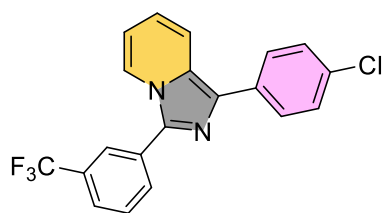

Compound (3t)

<sup>1</sup>H NMR of Compound 3t

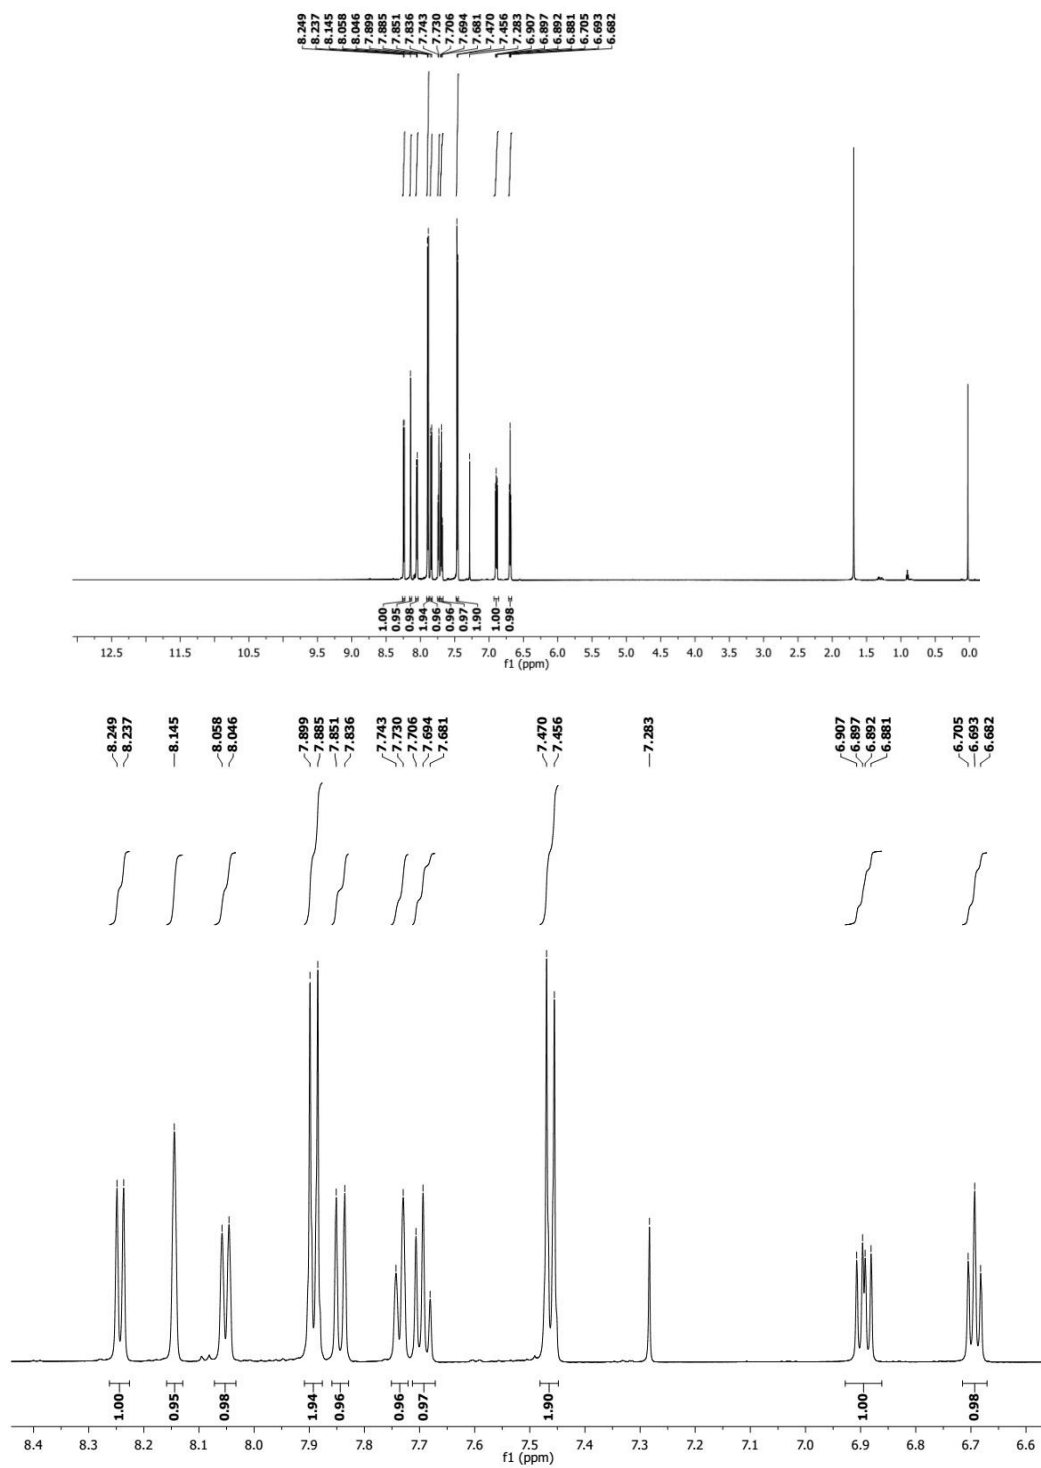

<sup>13</sup>C NMR of Compound 3t

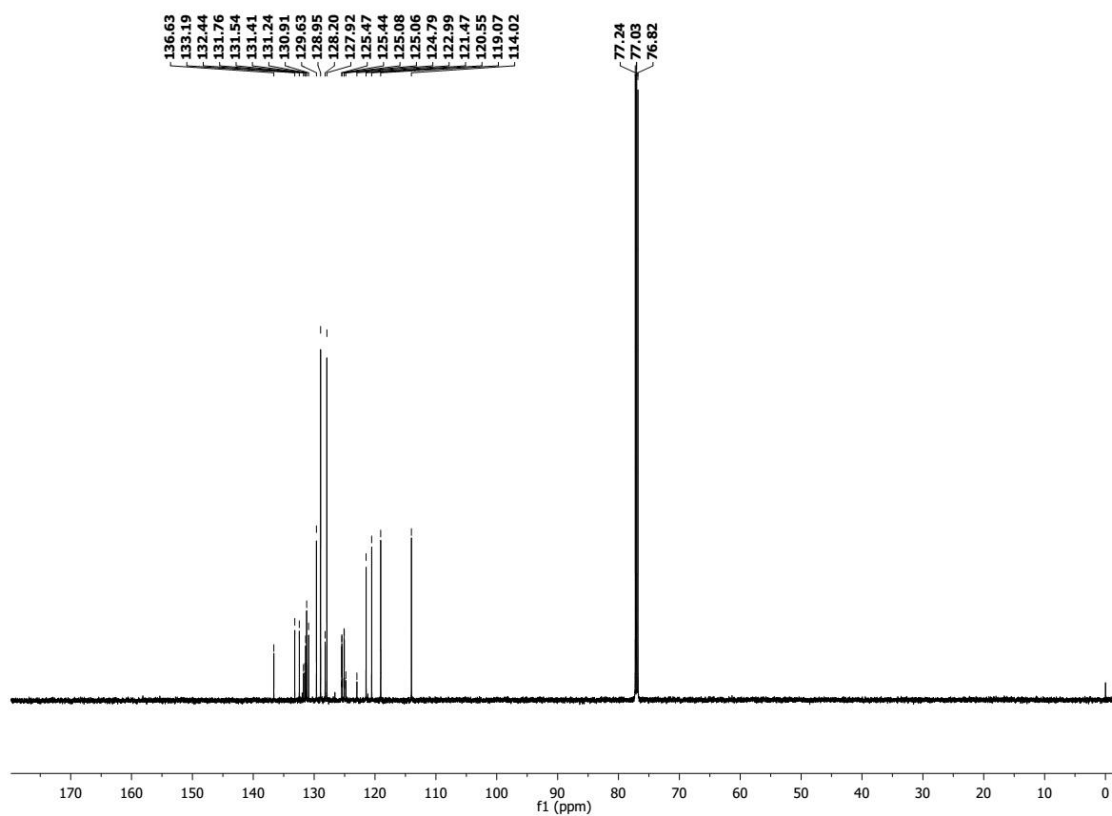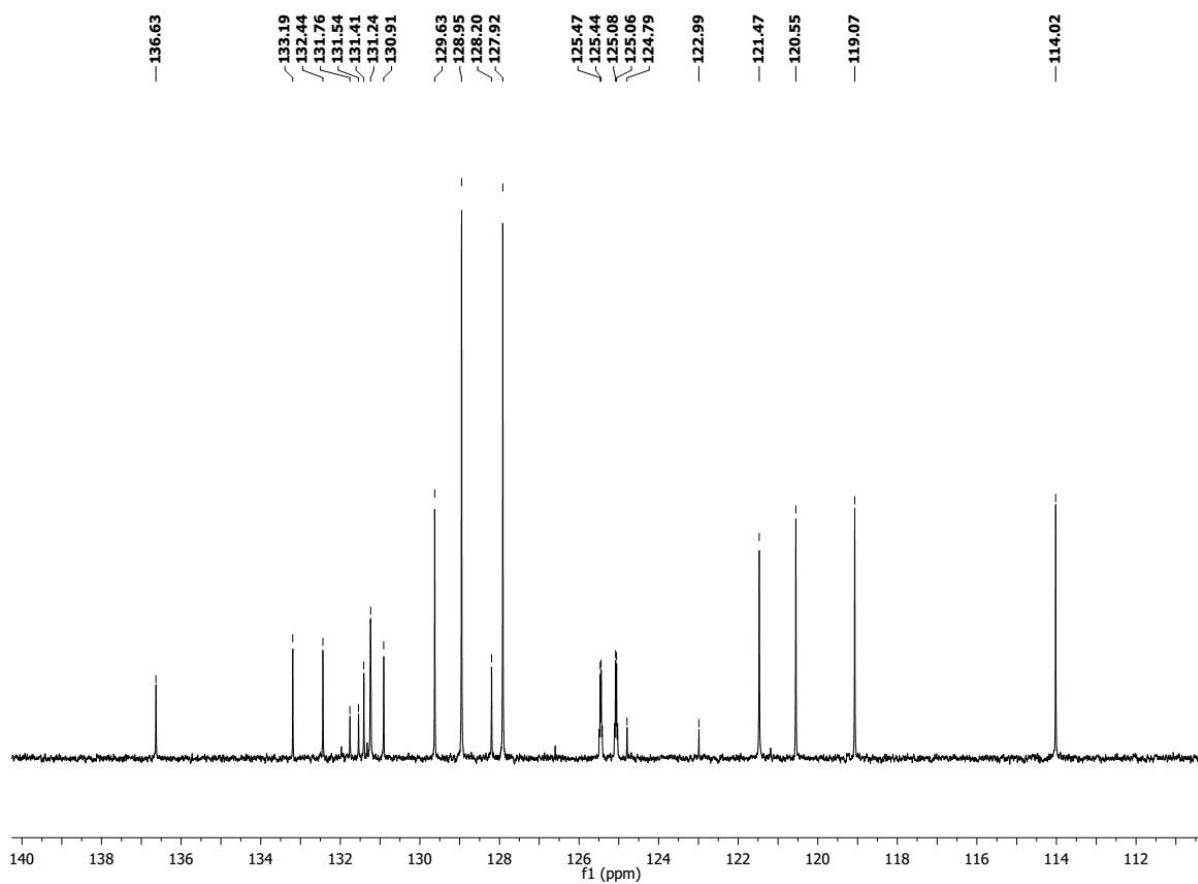

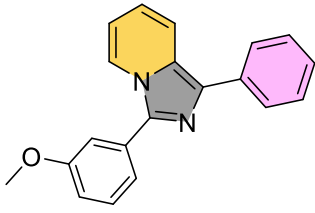

Compound (3u)

LC-MS of Compound 3u

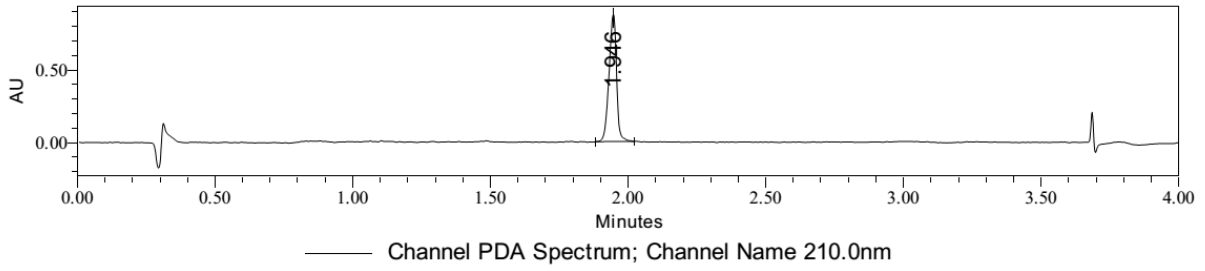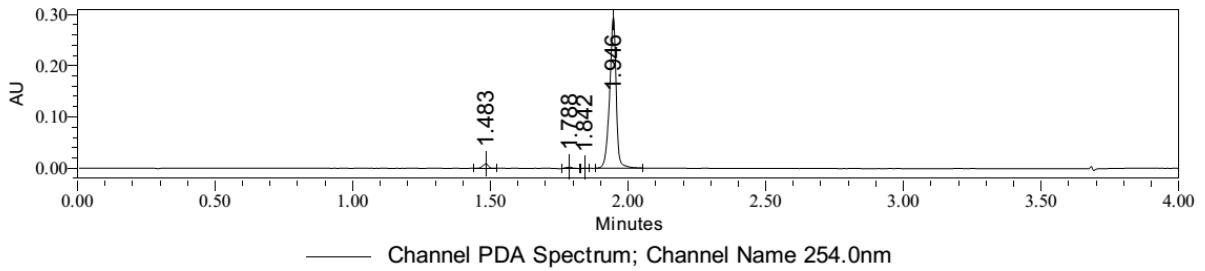

**Peak Results**  
Channel: PDA Spectrum

|   | RT    | Base Peak (m/z) | Height | Area    | % Area | Channel      | Channel Name |
|---|-------|-----------------|--------|---------|--------|--------------|--------------|
| 1 | 1.483 |                 | 9020   | 11930   | 2.37   | PDA Spectrum | 254.0nm      |
| 2 | 1.788 |                 | 2950   | 5060    | 1.00   | PDA Spectrum | 254.0nm      |
| 3 | 1.842 |                 | 799    | 809     | 0.16   | PDA Spectrum | 254.0nm      |
| 4 | 1.946 |                 | 294870 | 486016  | 96.47  | PDA Spectrum | 254.0nm      |
| 5 | 1.946 |                 | 875637 | 1666342 | 100.00 | PDA Spectrum | 210.0nm      |

**Match Plot**

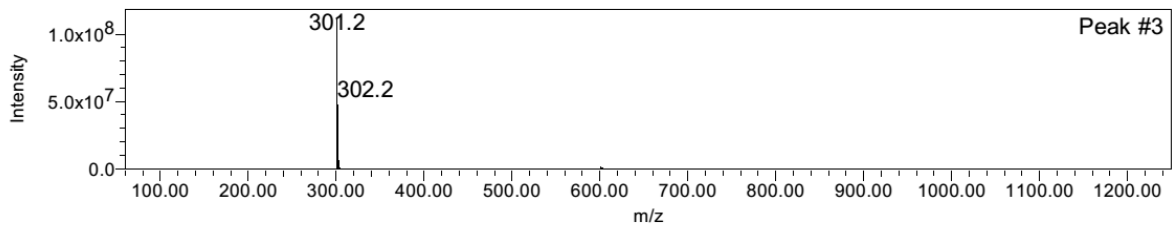

Base Peak 301.18 Channel Description 1: QDa Positive(+) Scan (60.00-1250.00)Da, Centroid, CV=10 - AVG (2.7:3.9) 20.000 Th: 0.010 Retention Time 1.966

<sup>1</sup>H NMR of Compound 3u

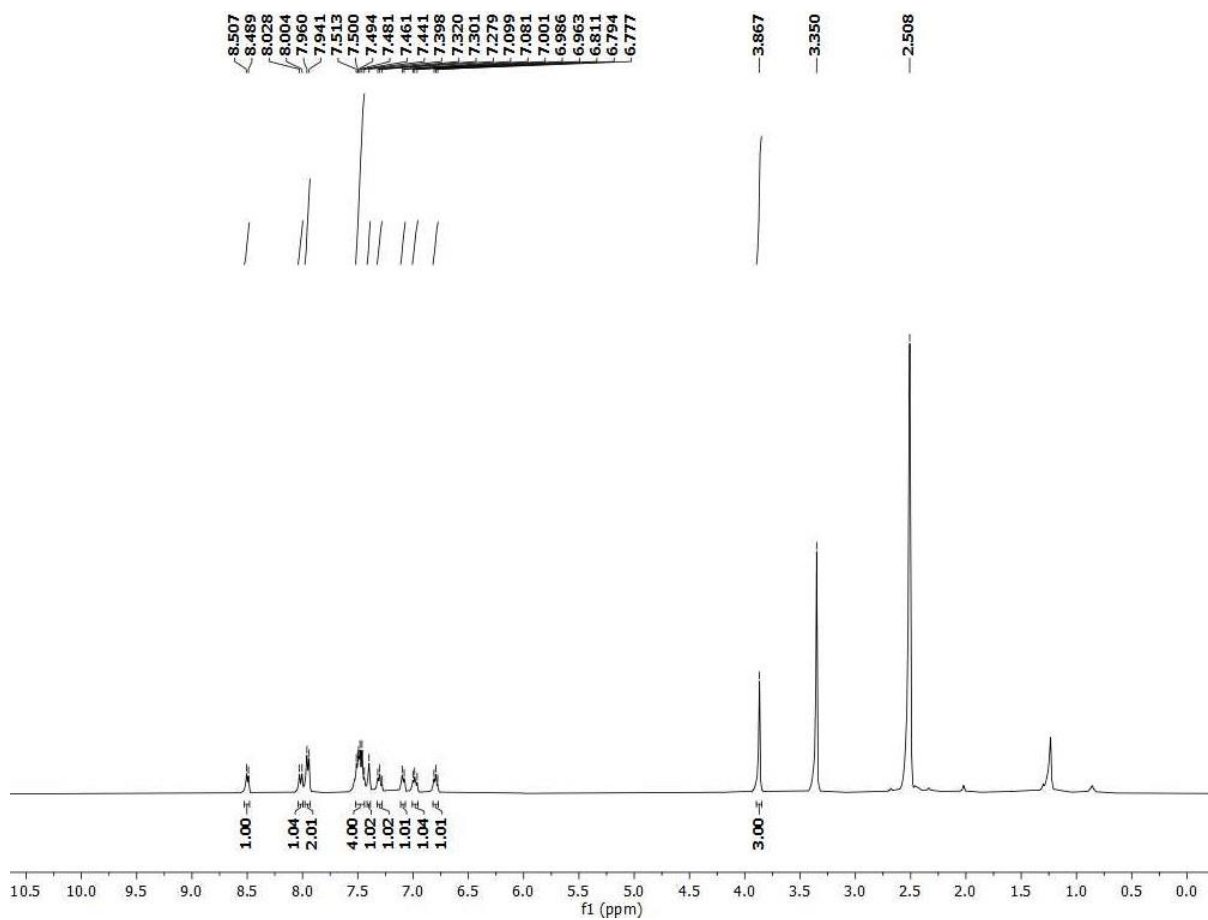

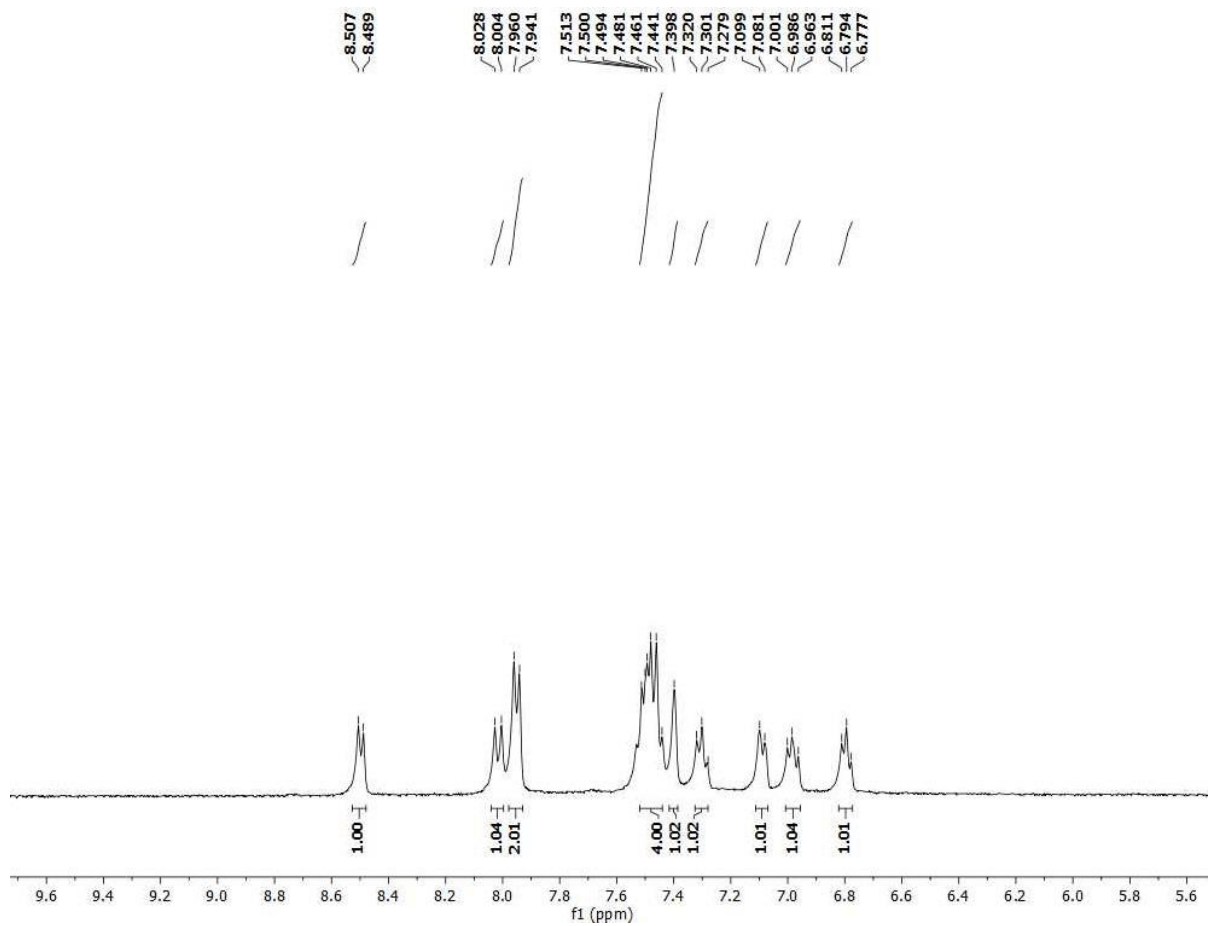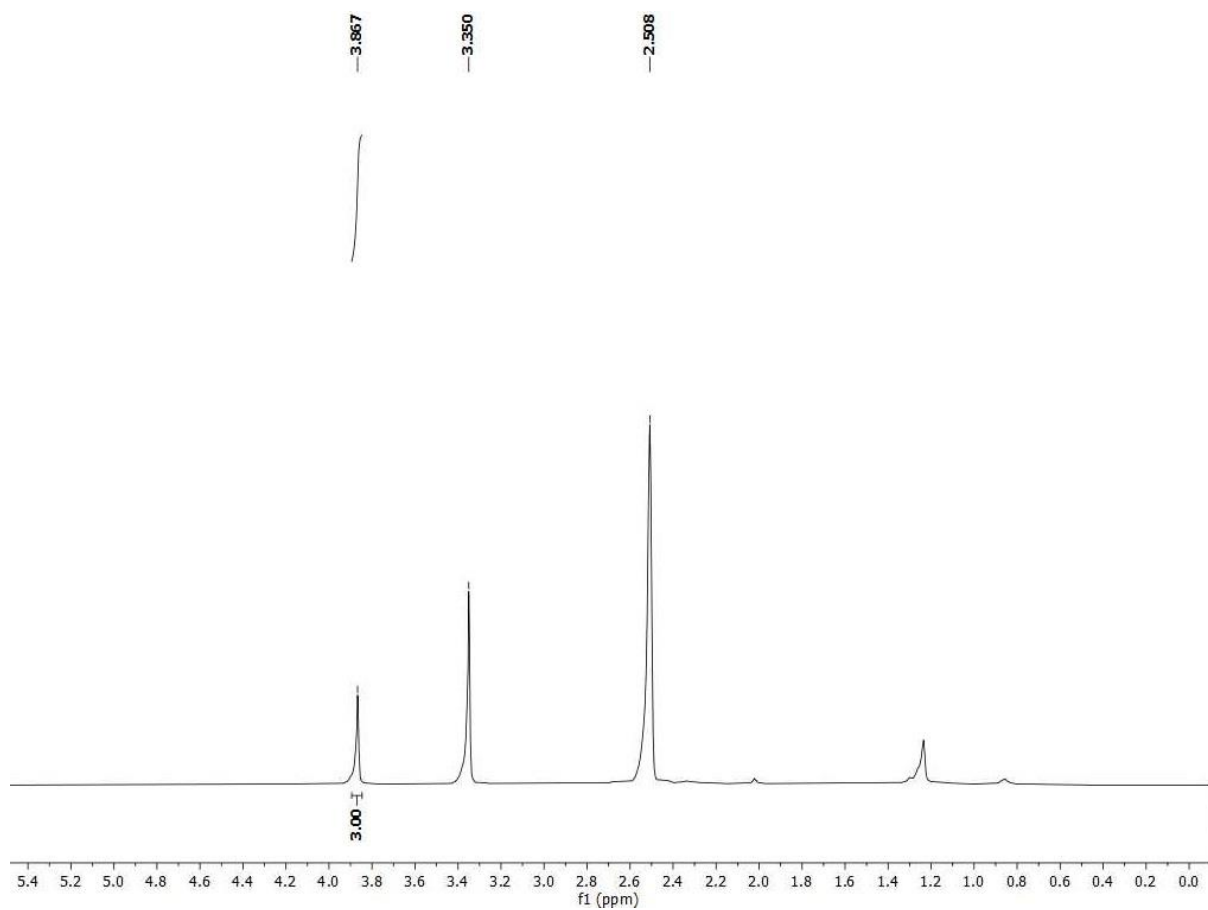



D<sub>2</sub>O NMR of Compound 3u

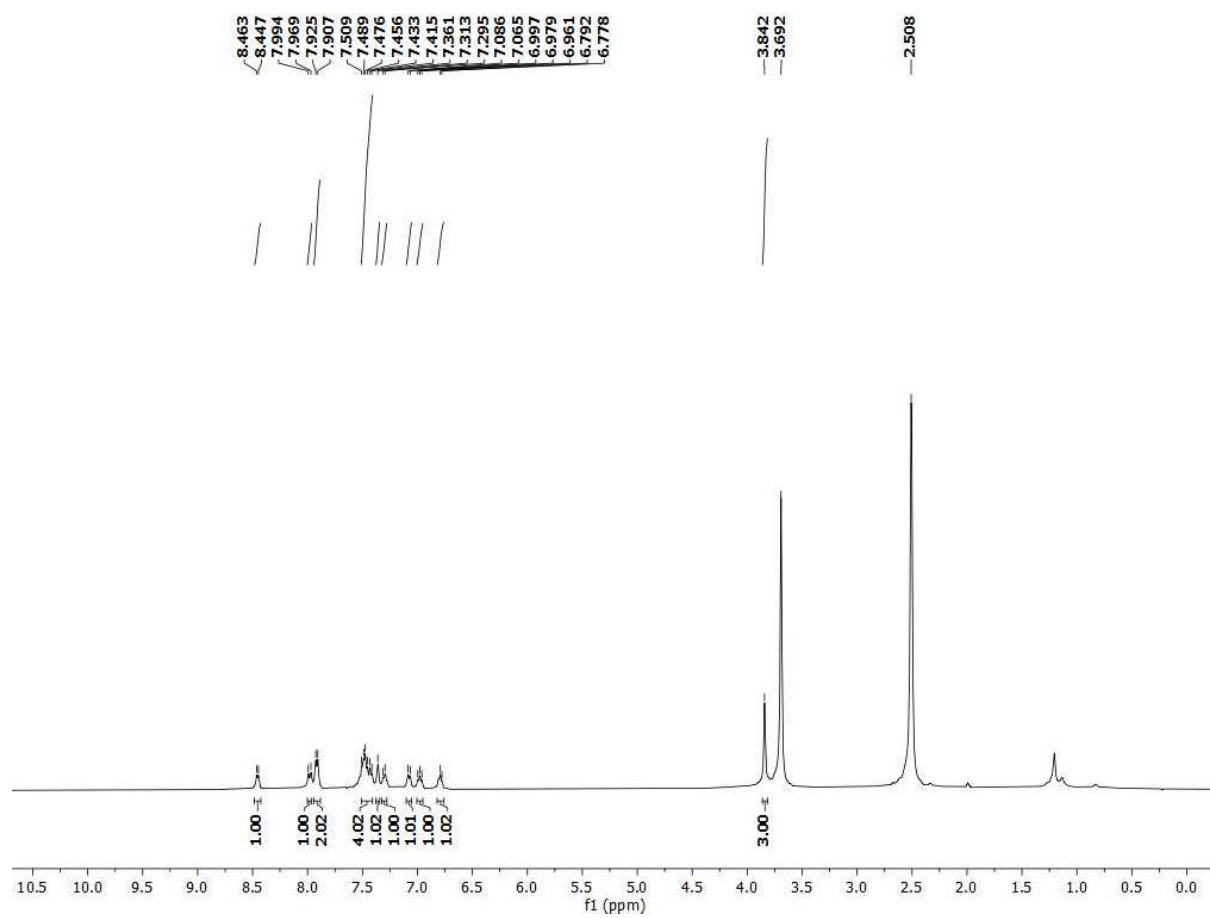

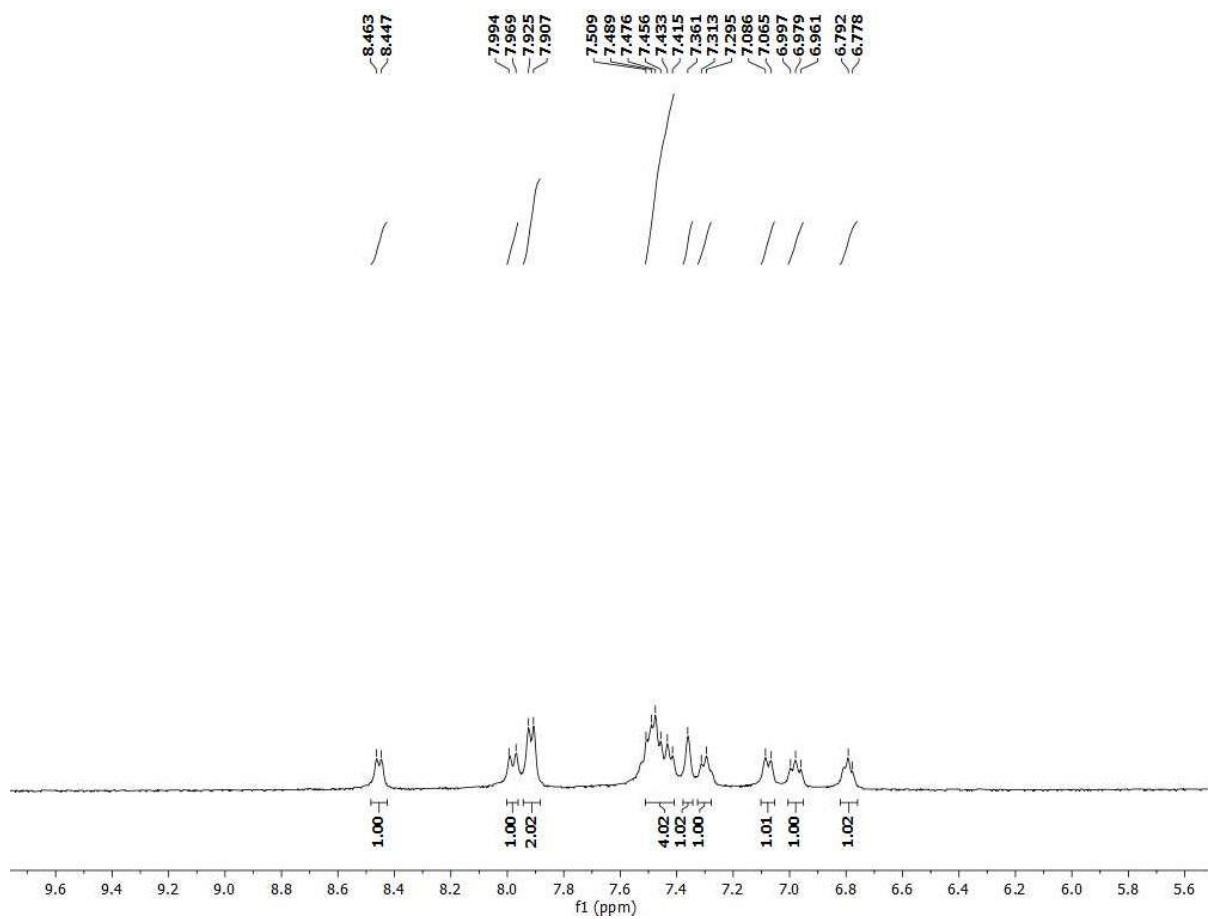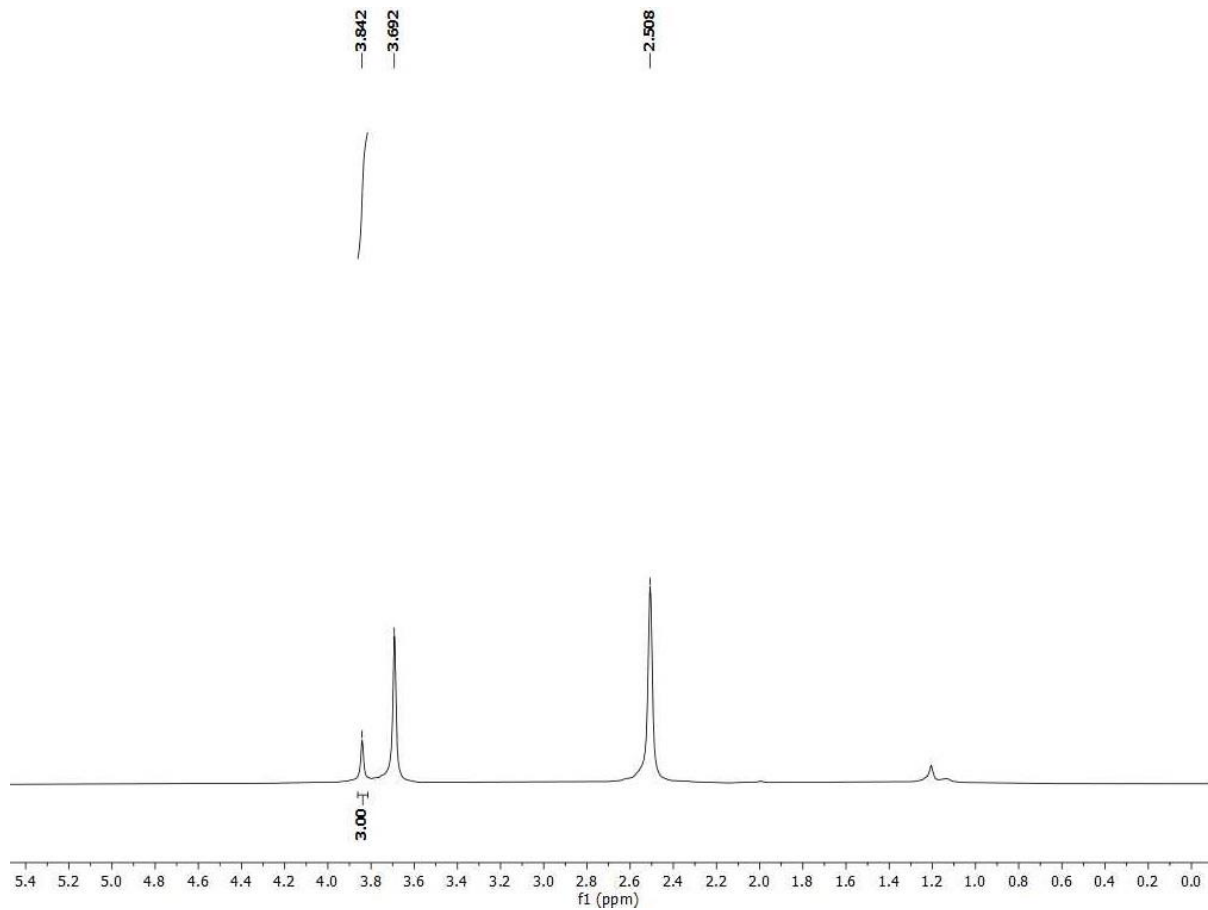

$^{13}\text{C}$  NMR of Compound 3u

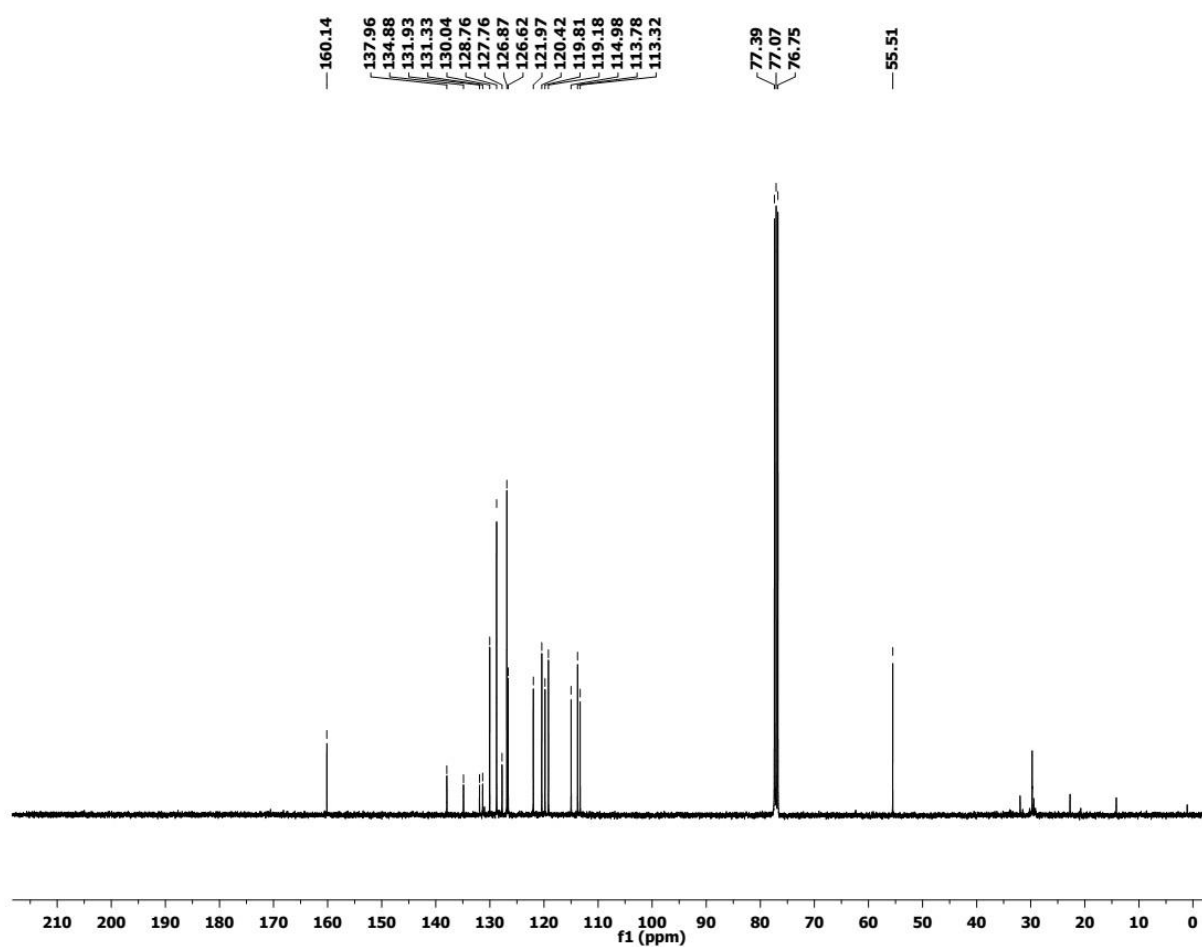

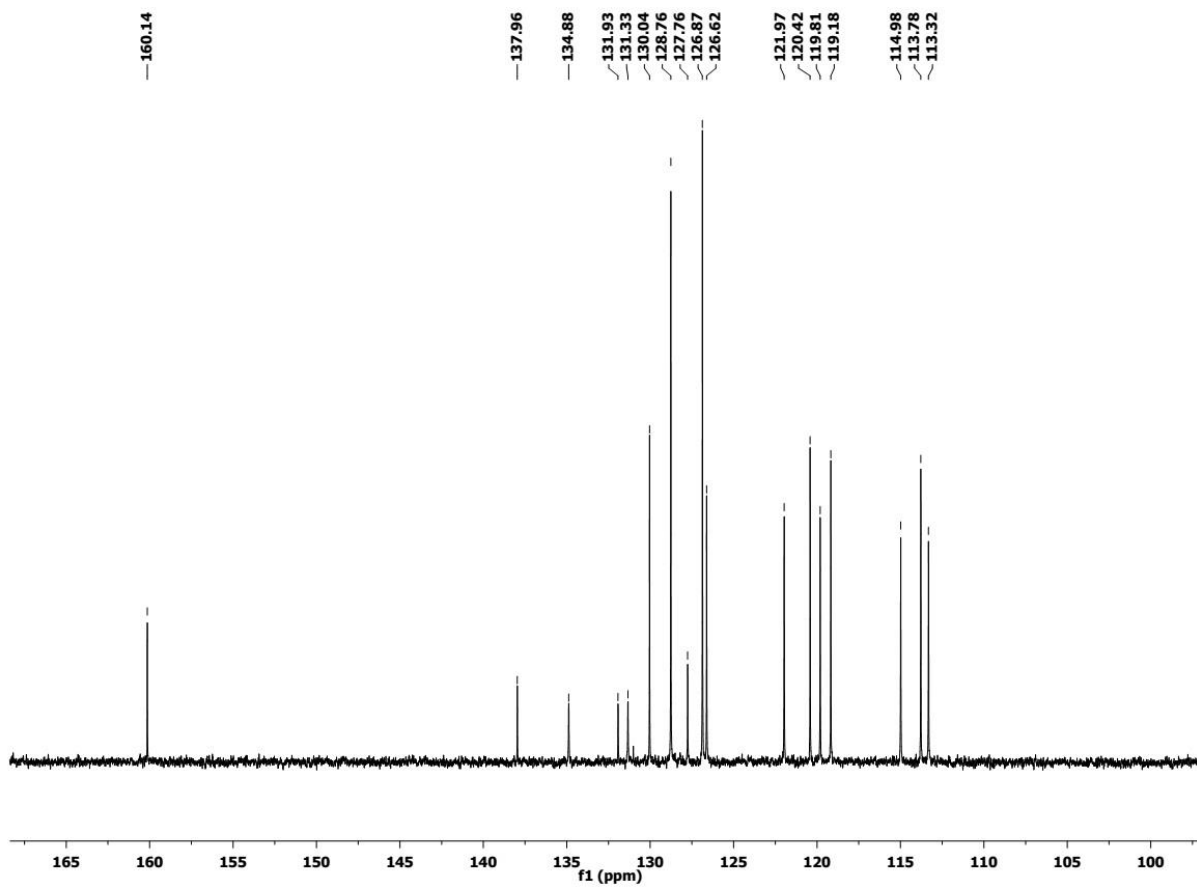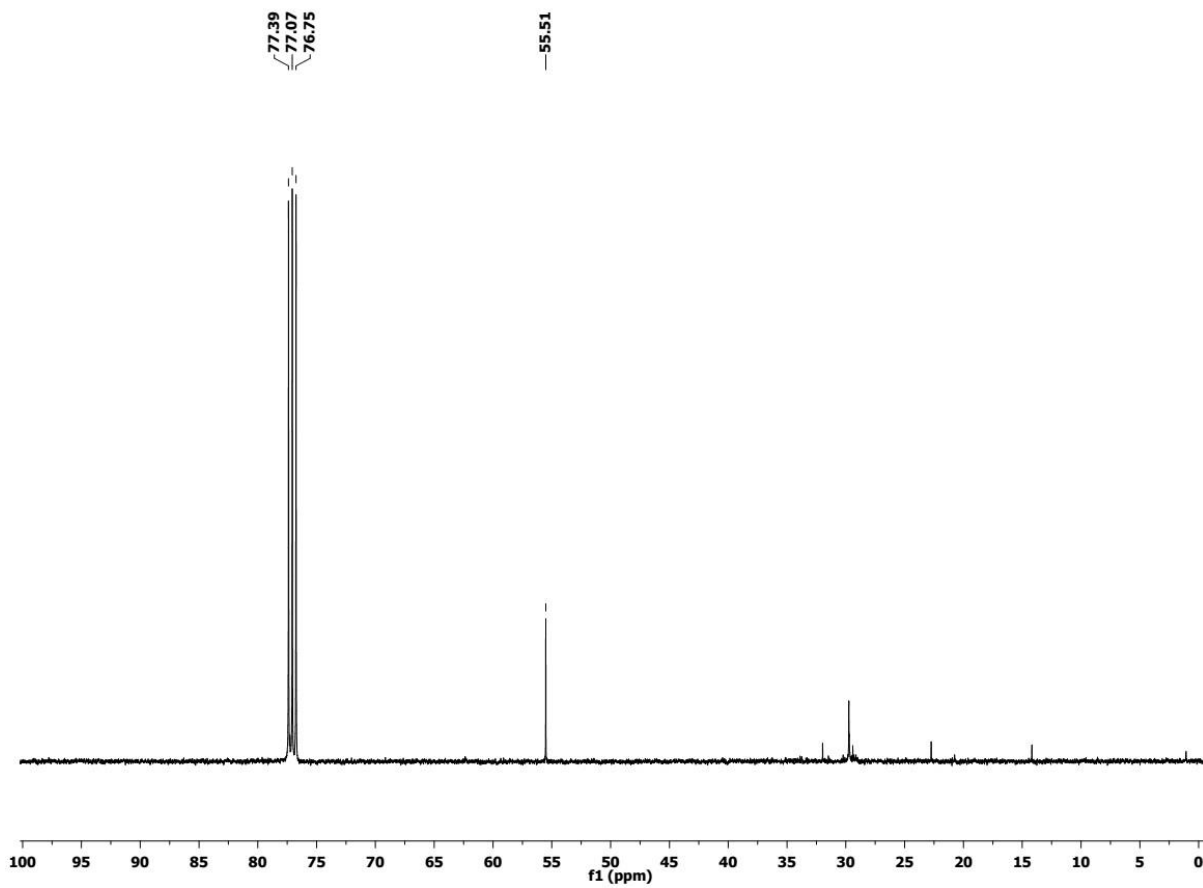

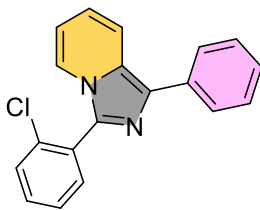

Compound (3v)

$^1\text{H}$  NMR of Compound 3v

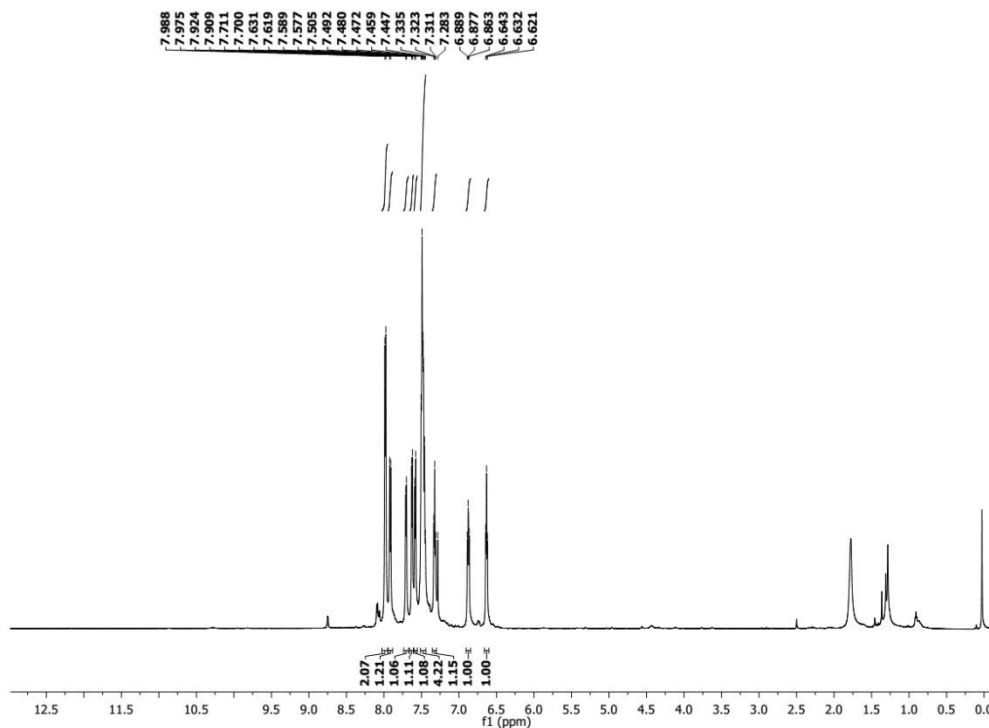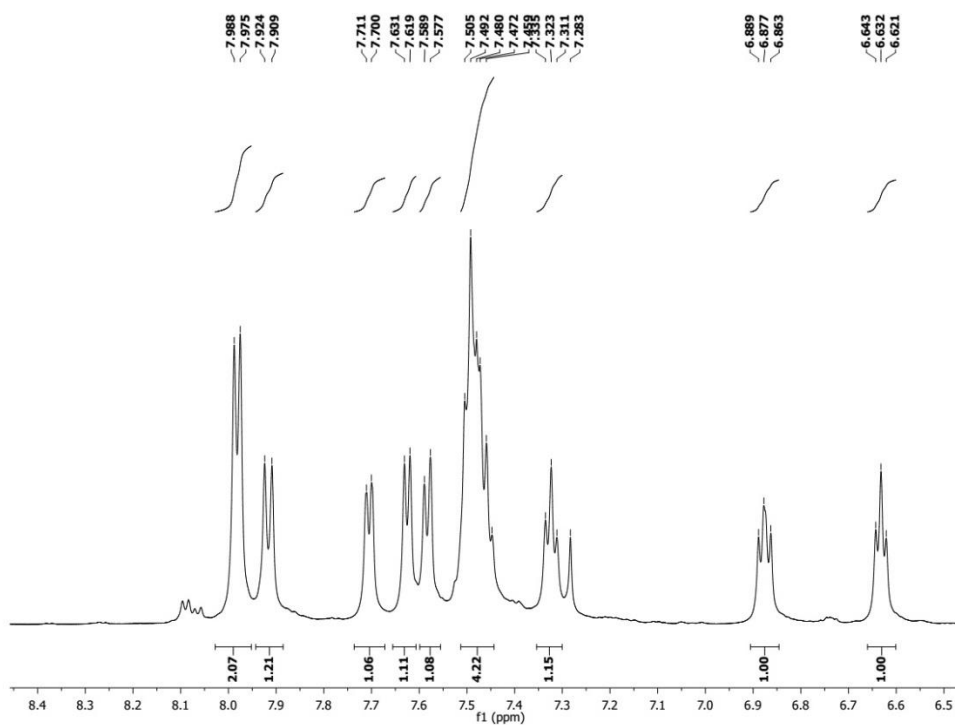

# <sup>13</sup>C NMR of Compound 3v

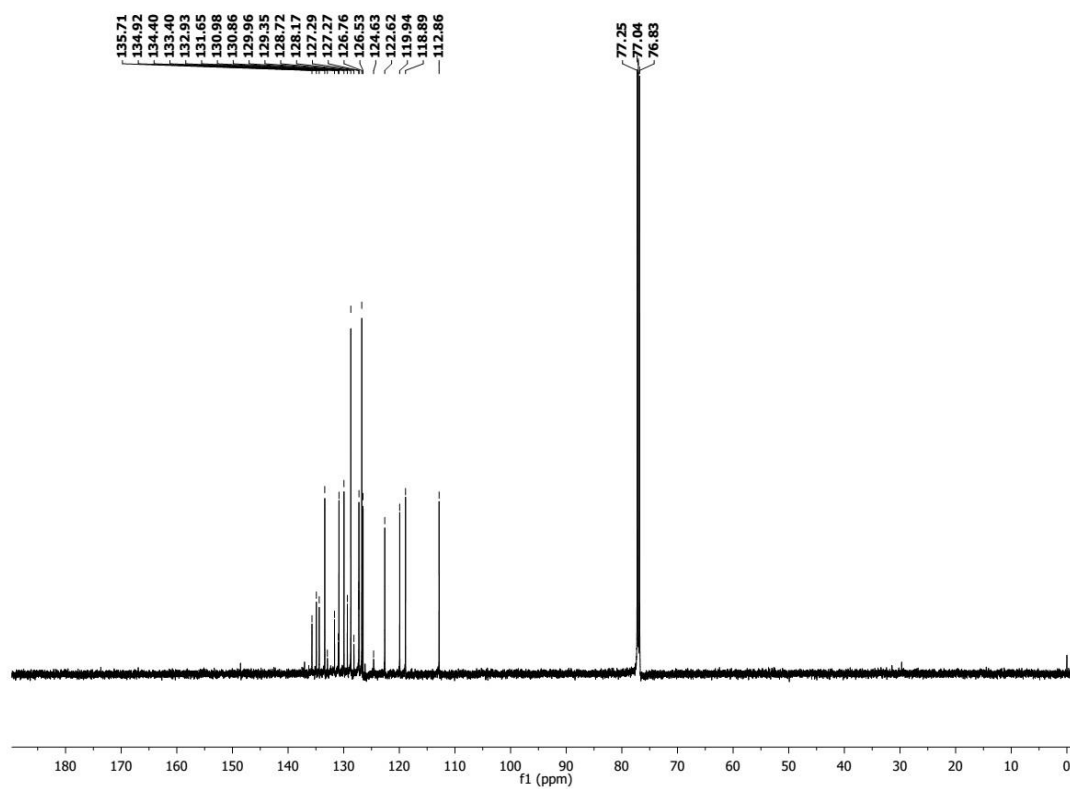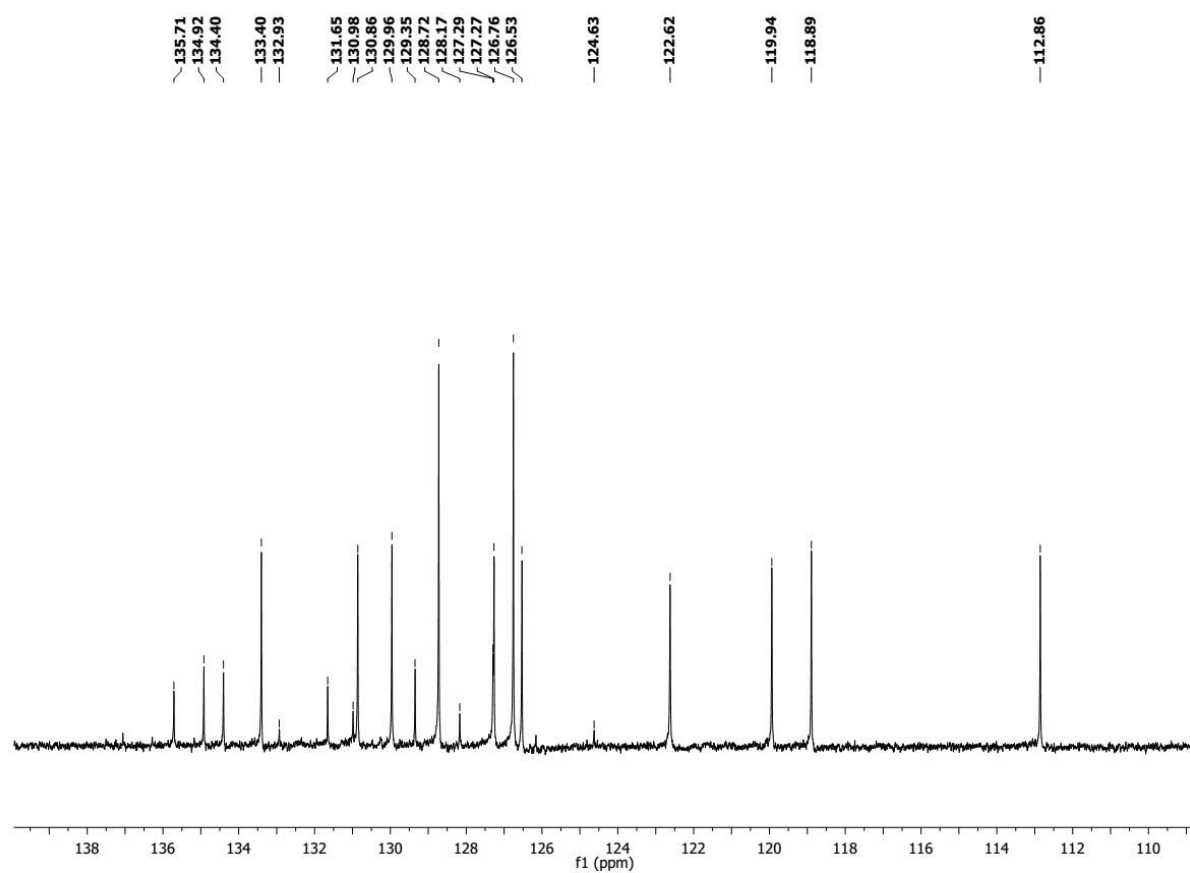

## References

1. A. S. Sharma, V. S Sharma and H. Kaur, *ACS Applied Nano Materials.*, 2020, **3**, 1191-1202.
2. H. Wang, W. Xu, Z. Wang, L. Yu, K. Xu, *J. Org. Chem.*, 2015, **80**, 2431-2435.
3. Z. Hu, J. Hou, J. Liu, W. Yu, J. Chang, *Org. Biomol. Chem.*, 2018, **16**, 5653.
4. M. Li, Y. Xie, Y. Ye, Y. Zou, H. Jiang, W. Zeng, *Org. Lett.*, 2014, **23**, 6232-6235.
5. U. C. Rajesh, G. Purohit, D. S. Rawat, *ACS Sustainable Chemistry & Engineering* .,2015, **10**, 2397-2404
6. U. Gulati, U. C. Rajesh, D. S. Rawat, *ACS Sustainable Chemistry & Engineering.*, 2018, **6**, 10039-10051.
7. A. Joshi, D. C. Mohan, S. Adimurthy, *J. Org. Chem.*, 2016, **19**, 9461-9469.
